# Supplementary material for: Generalizable transcriptome-based tumor malignant level evaluation and molecular subtyping towards precision oncology
Source: Springer Nature journal article supplement (doi:10.1186/s12967-024-05326-0), 2024-05-28
Supplement: MOESM2 [file 12967_2024_5326_MOESM2_ESM.pdf]

**Generalizable transcriptome-based tumor malignant level evaluation and  
molecular subtyping towards precision oncology**

Dingxue Hu *et al.*

This supplementary file includes Suppl. Fig. S1-S17.

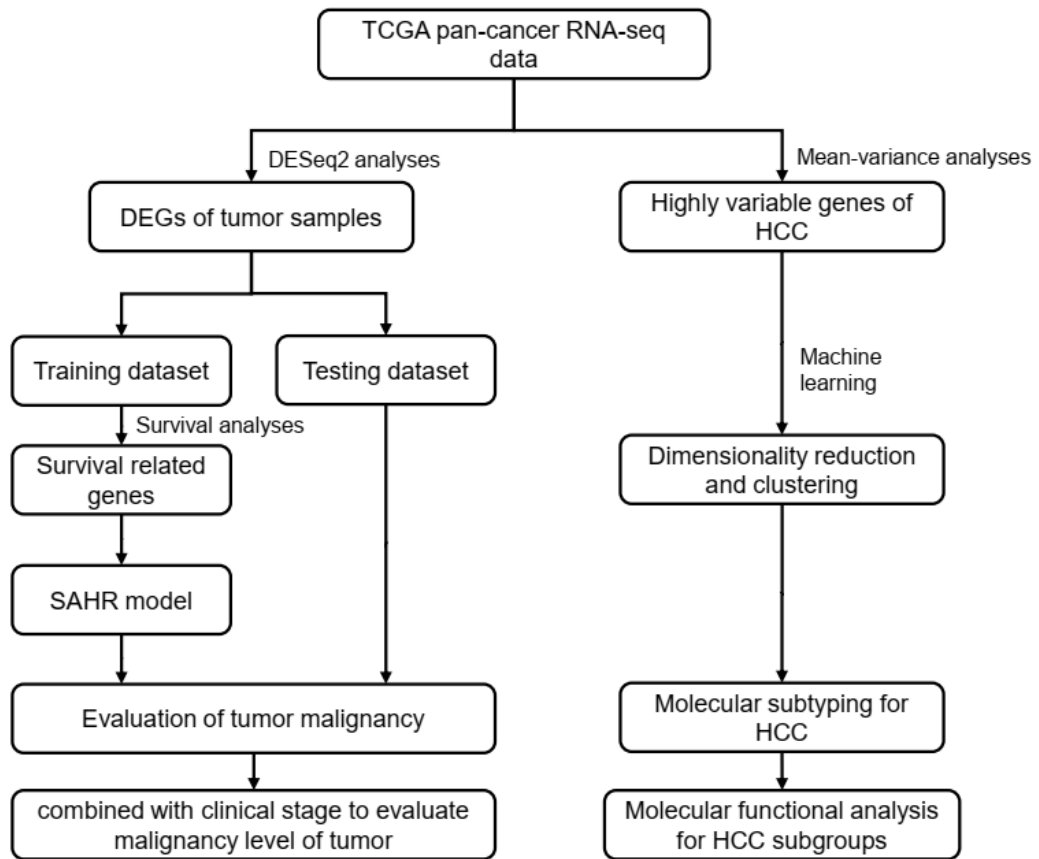

**Fig. S1. Workflow of the analysis in this study.**

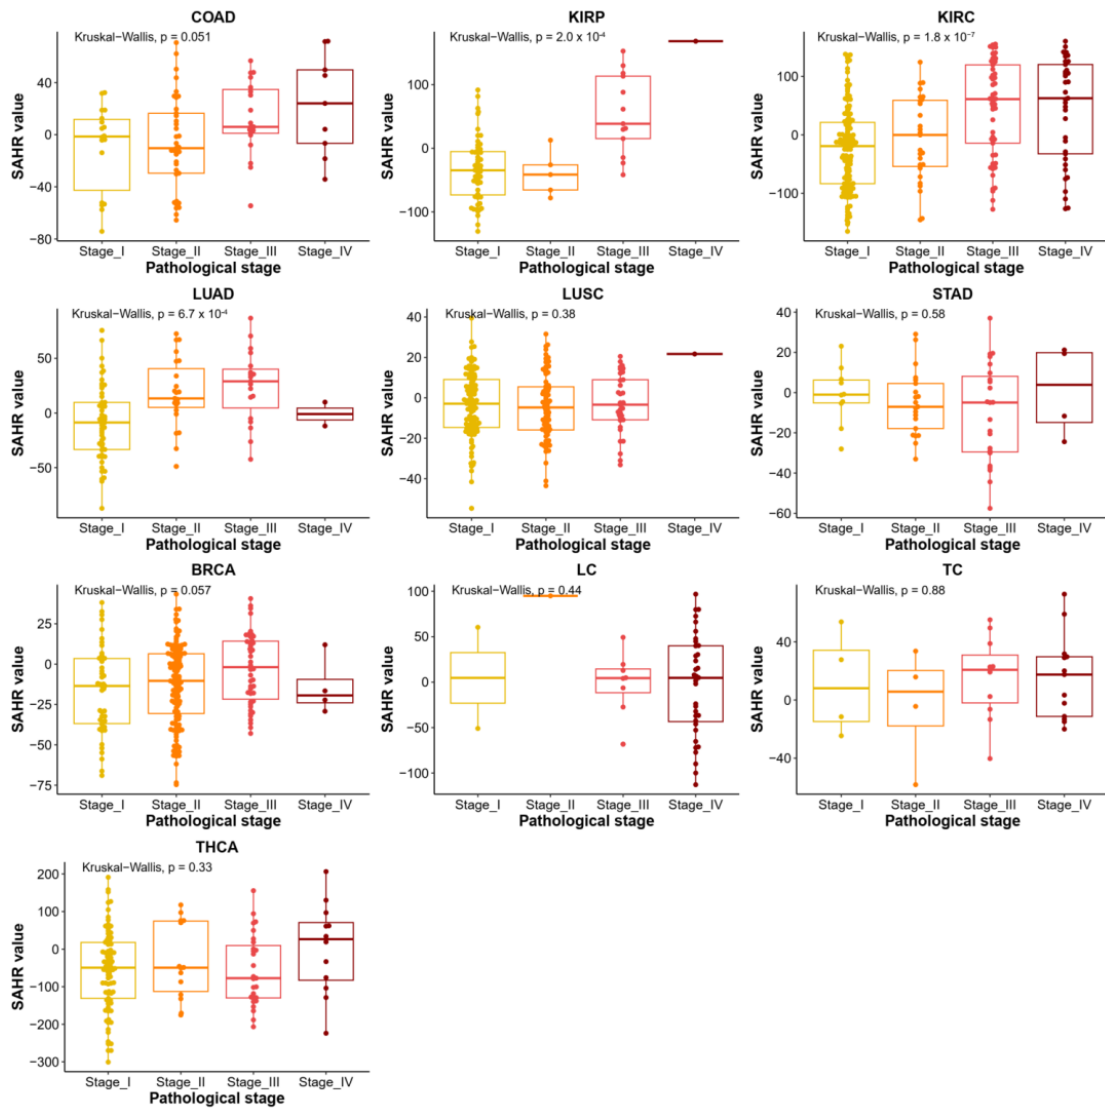

**Fig. S2. Associations between SAHR value and clinical stage among various cancer types.**

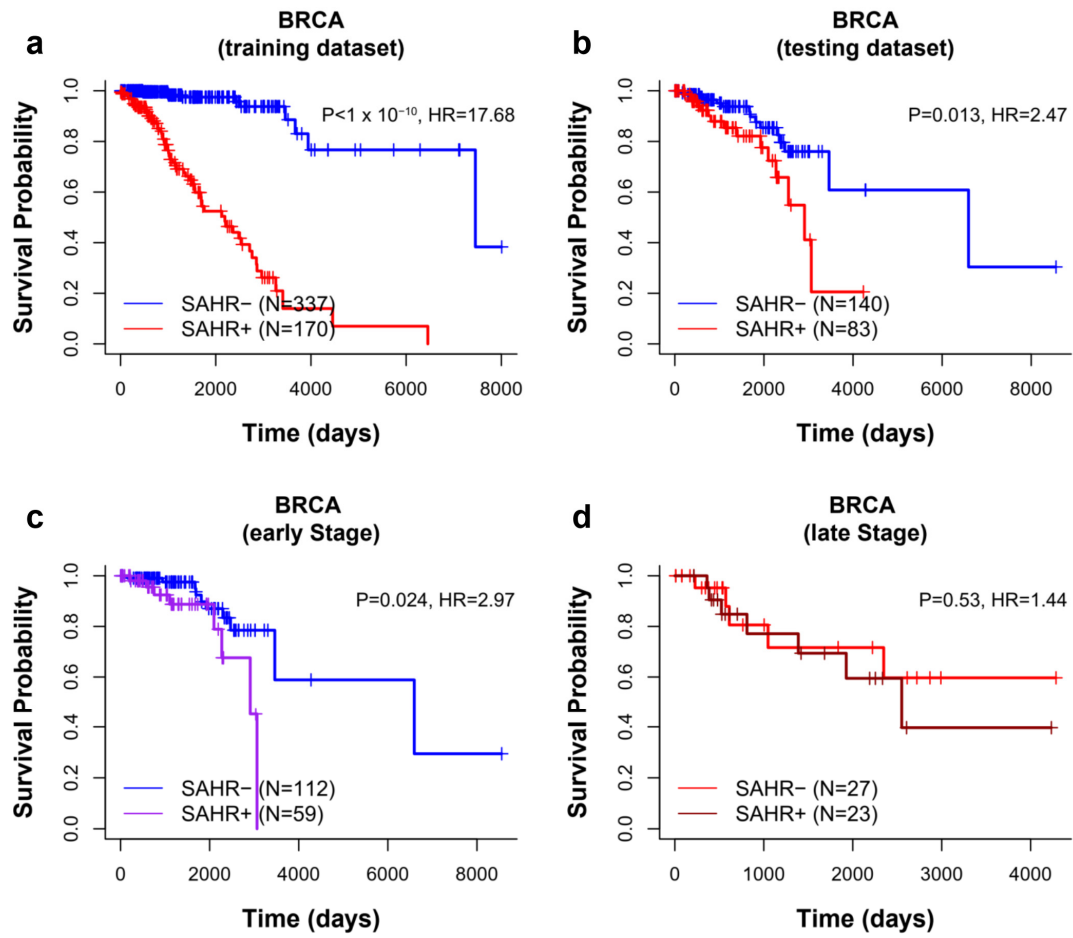

**Fig. S3. Comparison of breast cancer (BRCA) patients with different SAHR values.**

(a) training dataset, (b) testing dataset, (c) early- and (d) late-stage patients in testing dataset.

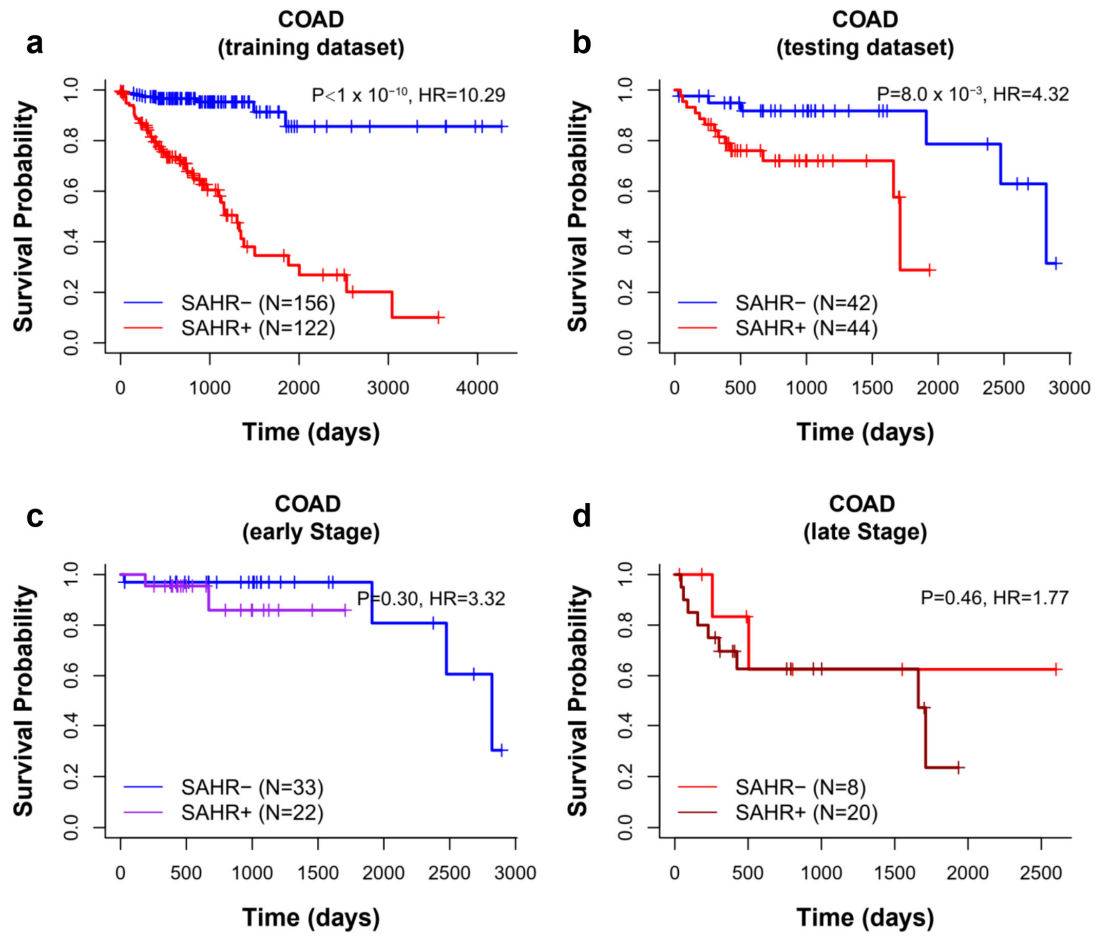

**Fig. S4. Comparison of colon adenocarcinoma (COAD) patients with different SAHR values.** (a) training dataset, (b) testing dataset, (c) early- and (d) late-stage patients in testing dataset.

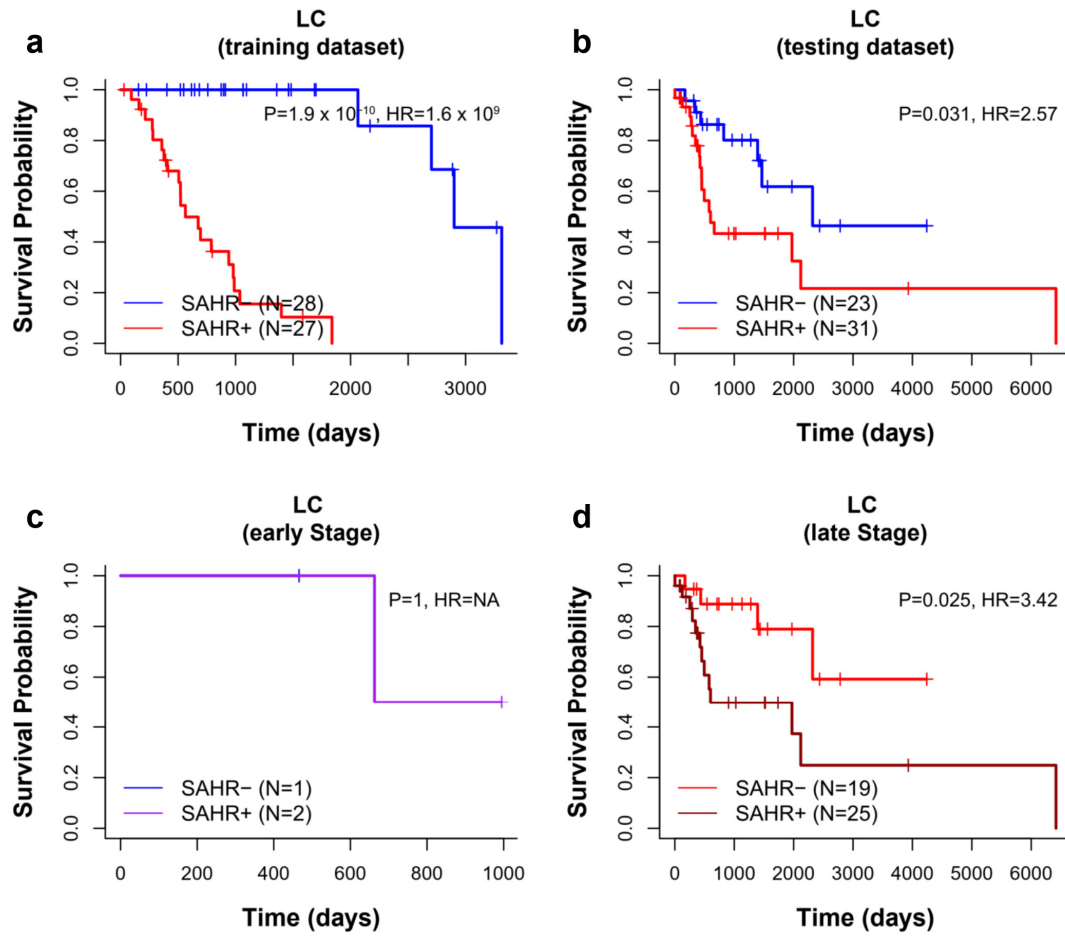

**Fig. S5. Comparison of Laryngeal cancer (LC) patients with different SAHR values.** (a) training dataset, (b) testing dataset, (c) early- and (d) late-stage patients in testing dataset.

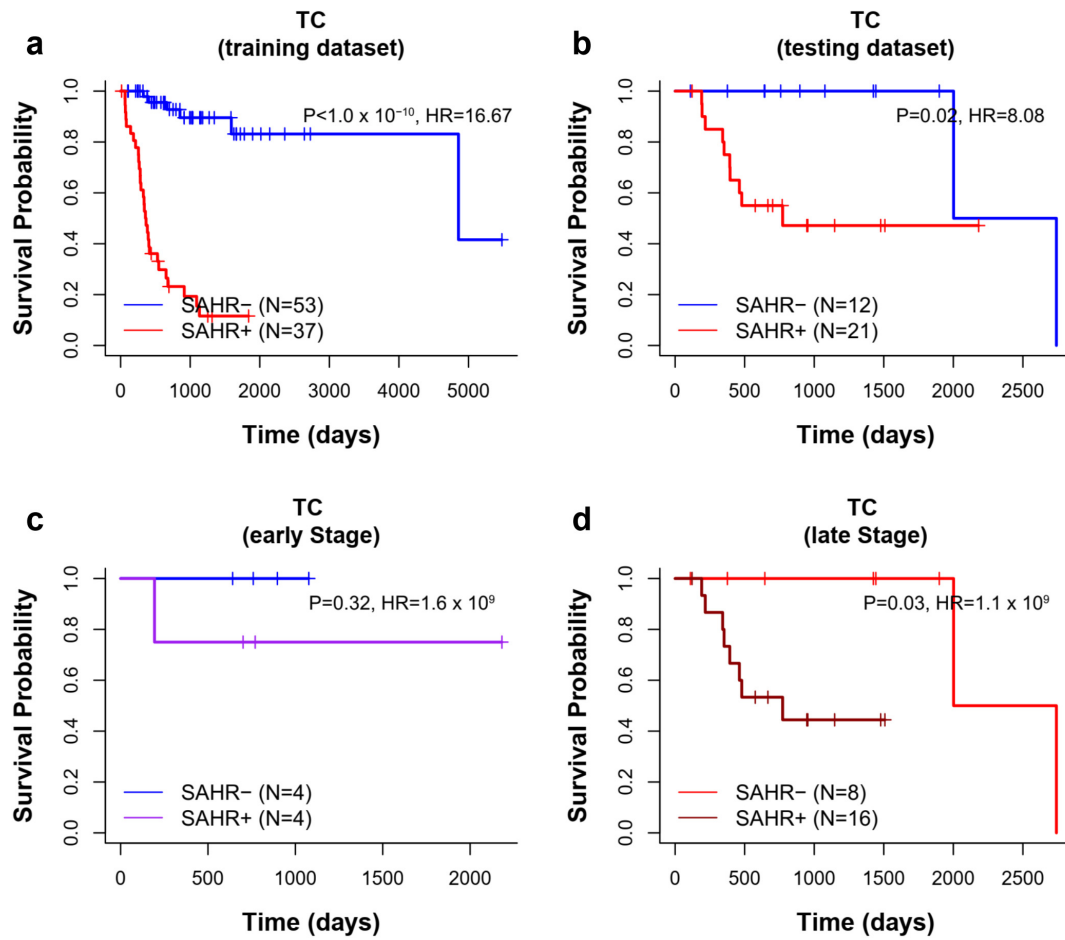

**Fig. S6. Comparison of Tongue cancer (TC) patients with different SAHR values.**

(a) training dataset, (b) testing dataset, (c) early- and (d) late-stage patients in testing dataset.

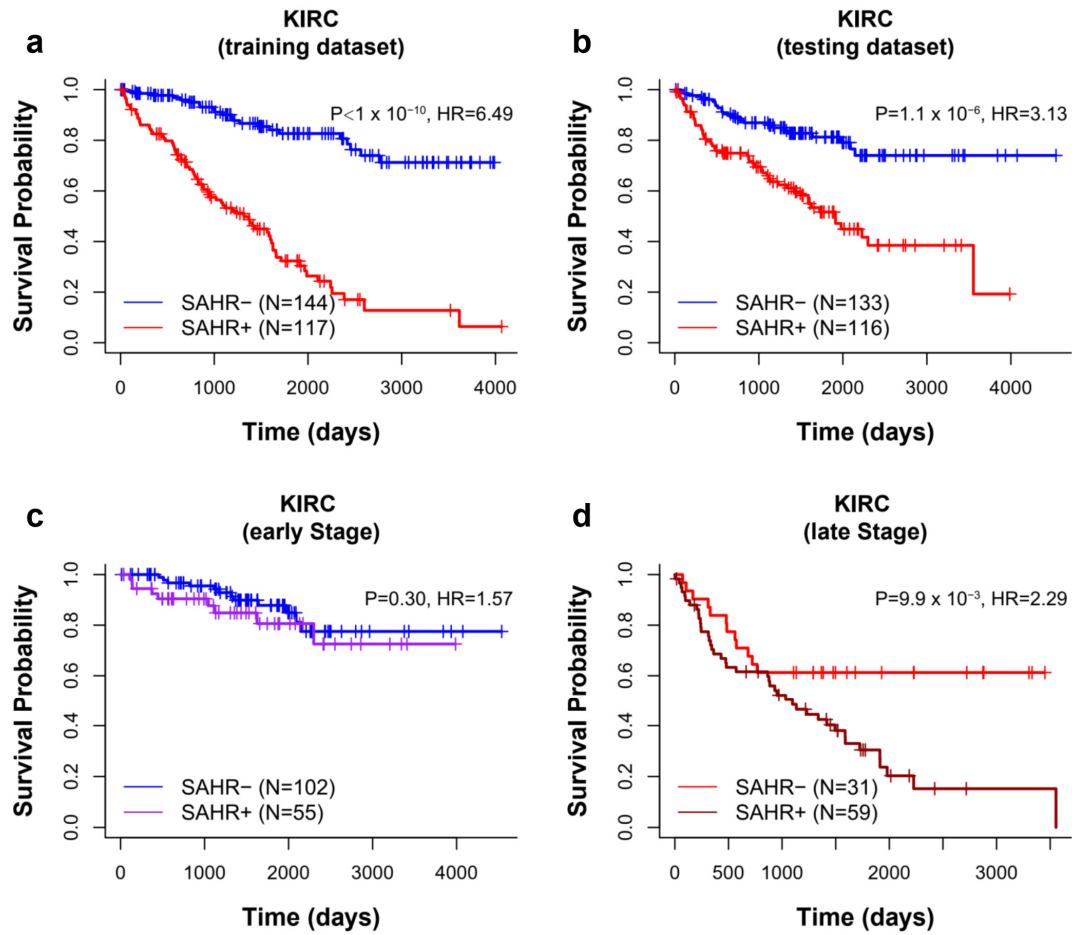

**Fig. S7. Comparison of Kidney renal clear cell carcinoma (KIRC) patients with different SAHR values. (a) training dataset, (b) testing dataset, (c) early- and (d) late-stage patients in testing dataset.**

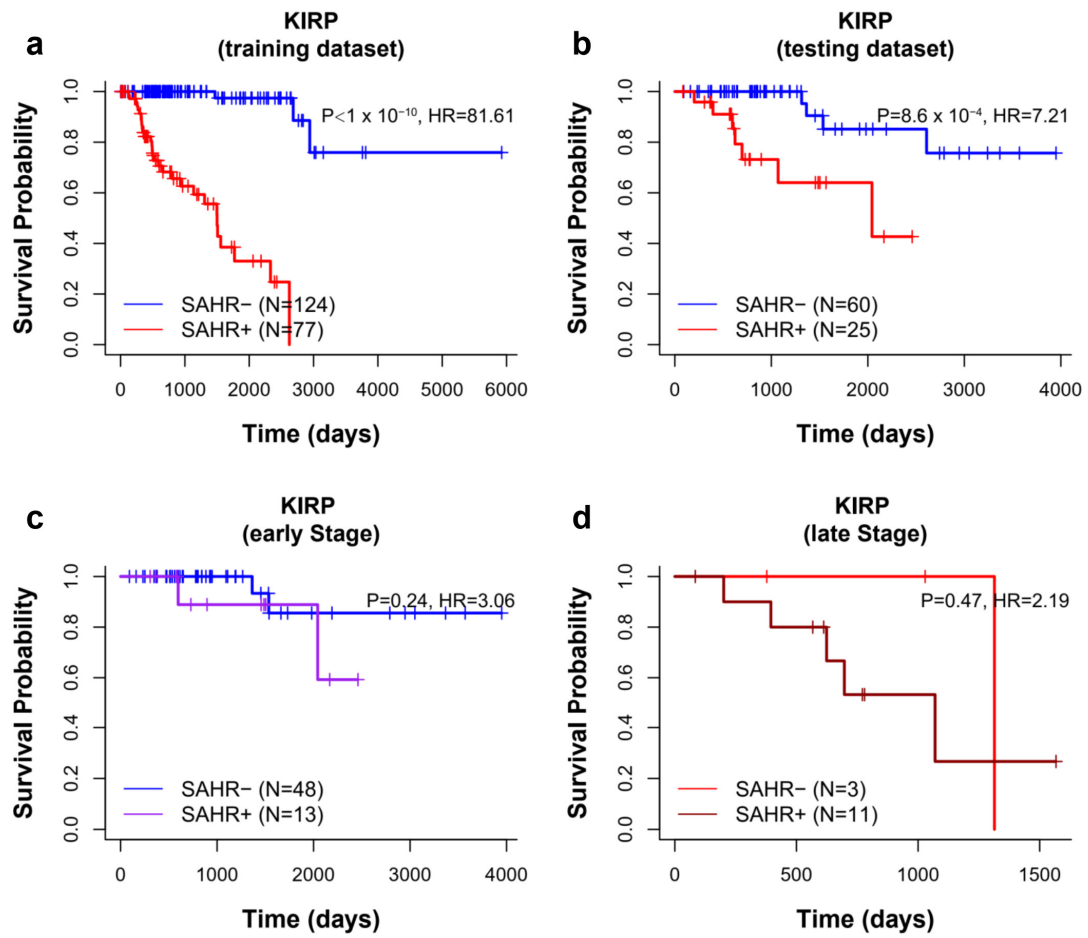

**Fig. S8. Comparison of Kidney renal papillary cell carcinoma (KIRP) patients with different SAHR values. (a) training dataset, (b) testing dataset, (c) early- and (d) late-stage patients in testing dataset.**

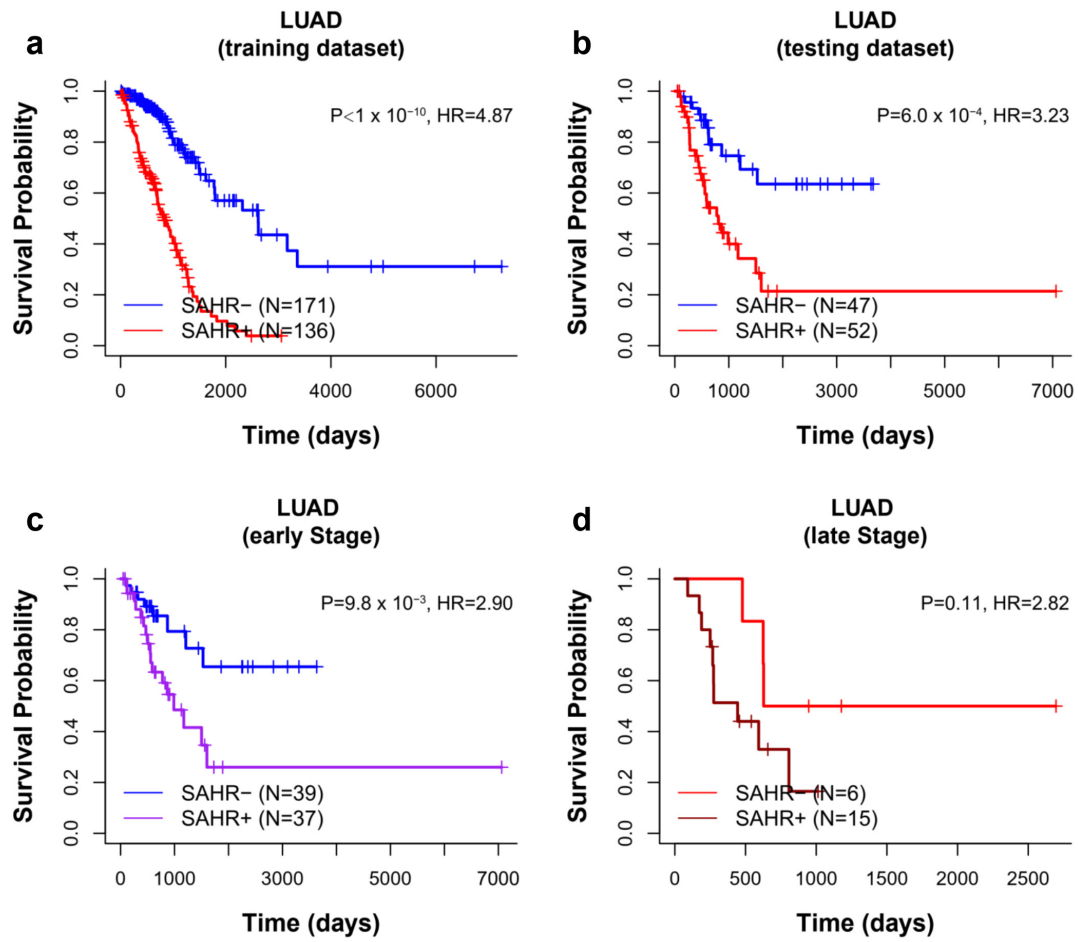

**Fig. S9. Comparison of Lung adenocarcinoma (LUAD) patients with different SAHR values.** (a) training dataset, (b) testing dataset, (c) early- and (d) late-stage patients in testing dataset.

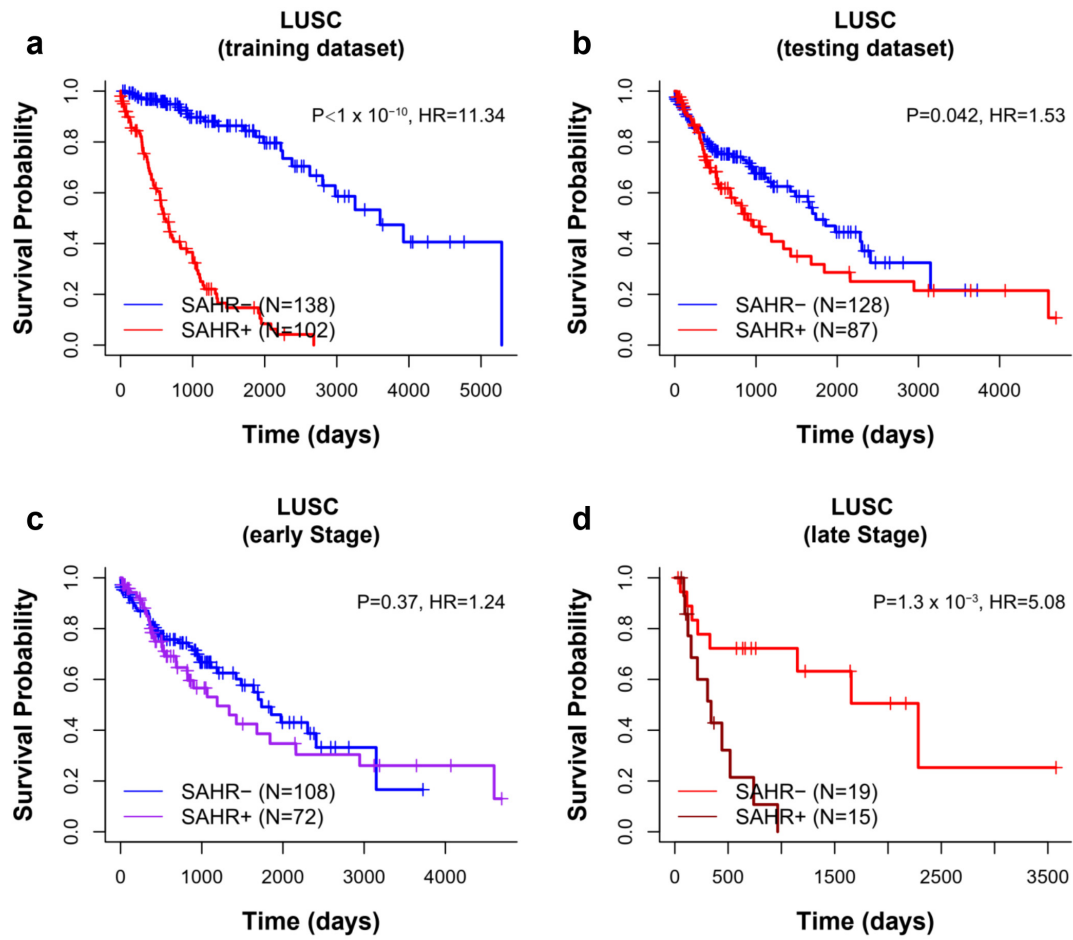

**Fig. S10. Comparison of Lung squamous cell carcinoma (LUSC) patients with different SAHR values. (a) training dataset, (b) testing dataset, (c) early- and (d) late-stage patients in testing dataset.**

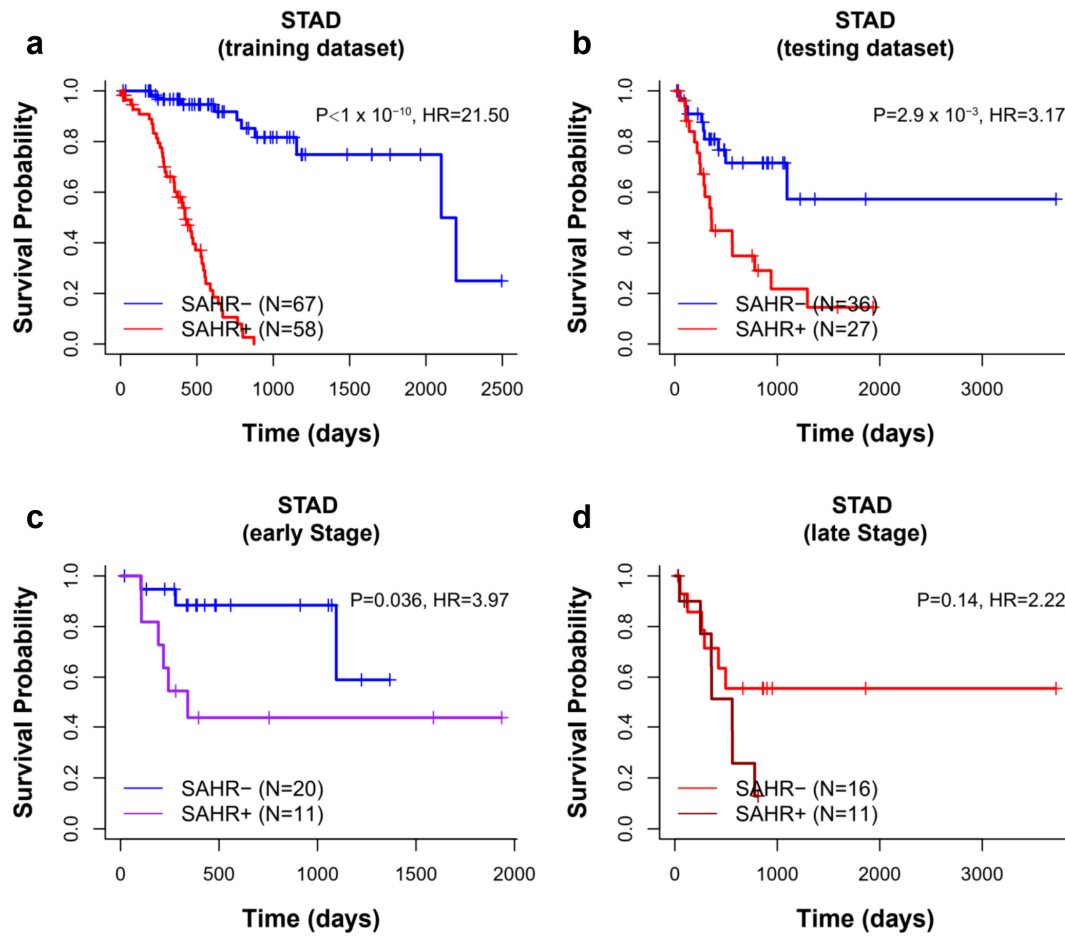

**Fig. S11. Comparison of Stomach adenocarcinoma (STAD) patients with different SAHR values.** (a) training dataset, (b) testing dataset, (c) early- and (d) late-stage patients in testing dataset.

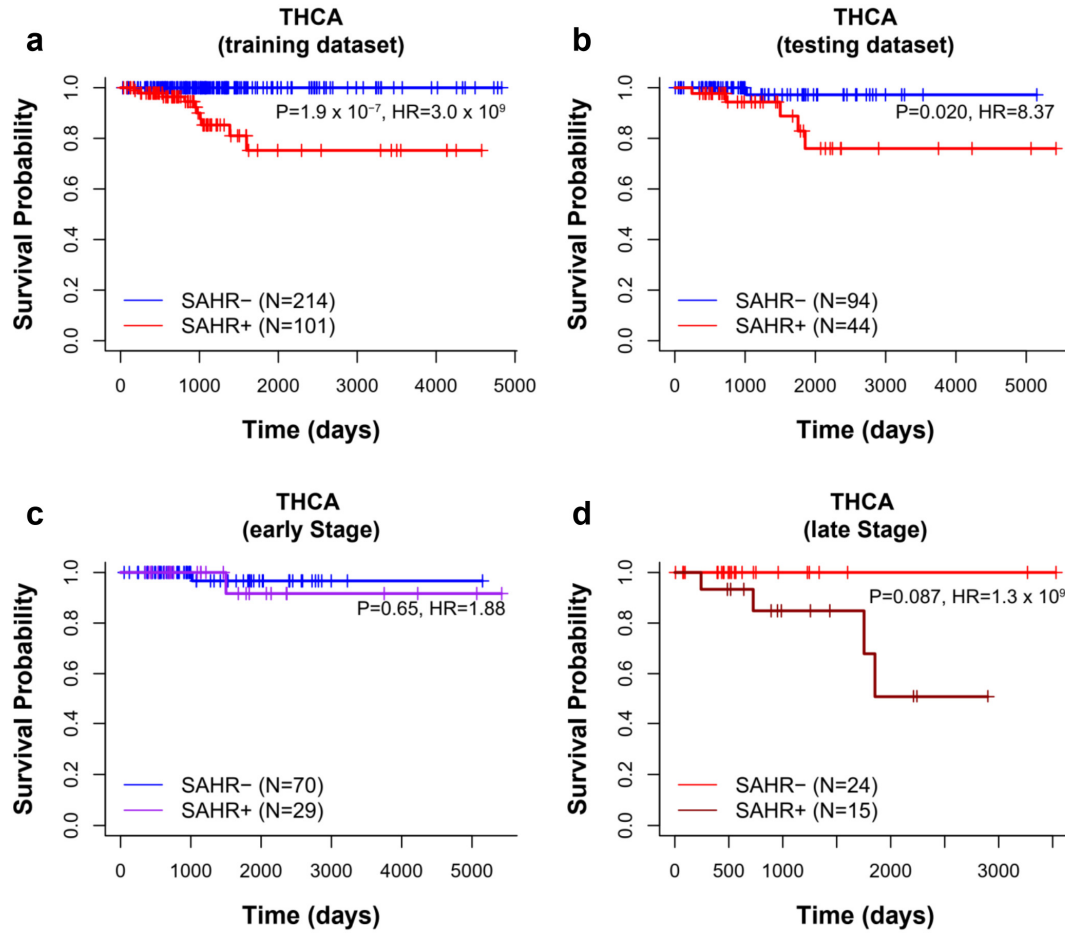

**Fig. S12. Comparison of Thyroid carcinoma (THCA) patients with different SAHR values.** (a) training dataset, (b) testing dataset, (c) early- and (d) late-stage patients in testing dataset.

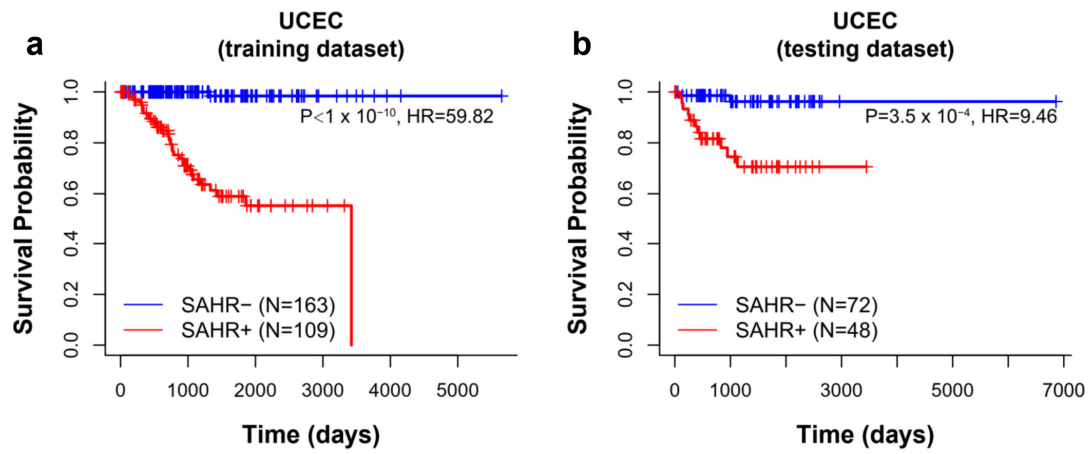

**Fig. S13. Comparison of Endometrial endometrioid adenocarcinoma (UCEC) patients with different SAHR values. (a) training dataset, (b) testing dataset.**

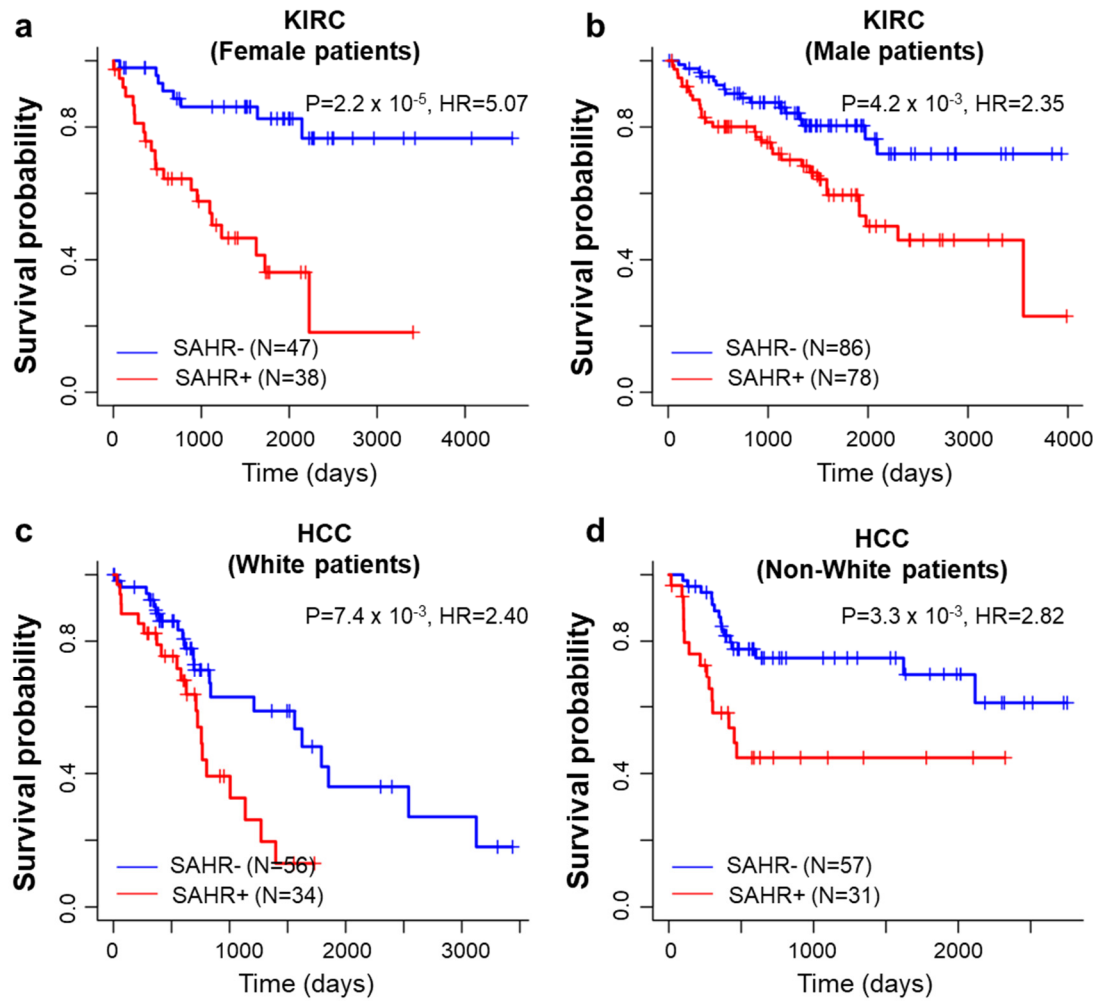

**Fig. S14. Comparison of patients' survival for SAHR values in patients with different gender or ethics.** (a) female and (b) male in KIRC, (c) White and (d) non-White in HCC.

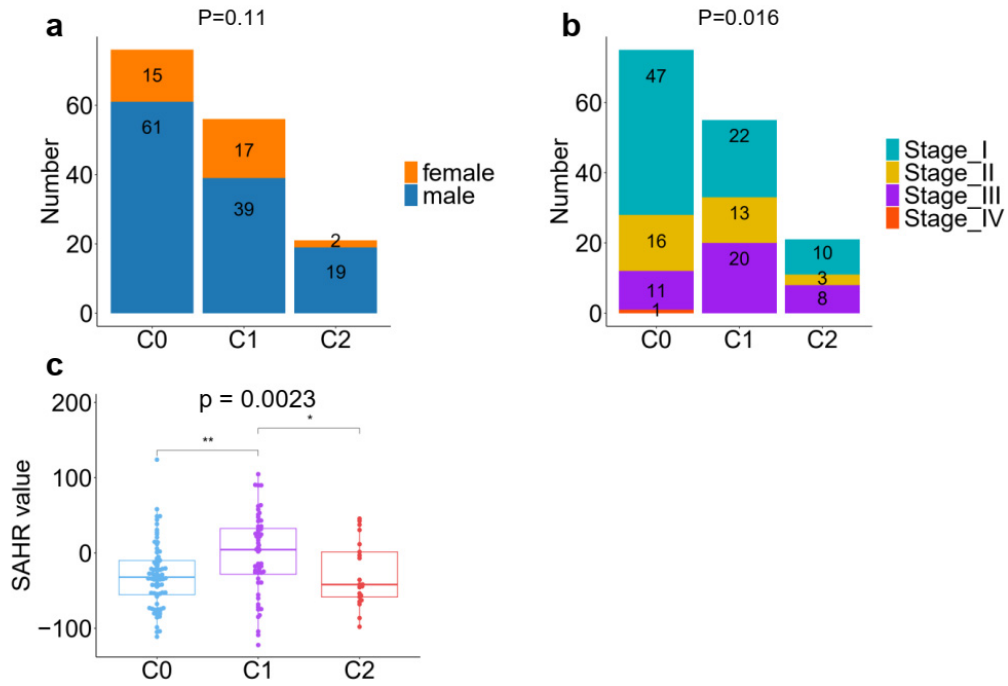

**Fig. S15. Gender and clinical stage distribution of HCC patients in different HCC subtypes.** (a) Gender, (b) Stage. P-values were calculated using Kruskal-Wallis tests.



tests, \*:  $p < 0.05$ , \*\*:  $p < 0.01$ , \*\*\*:  $p < 0.001$ . (d) KEGG pathway enrichment analyses based on gene expression profile data using gene set variation analysis.

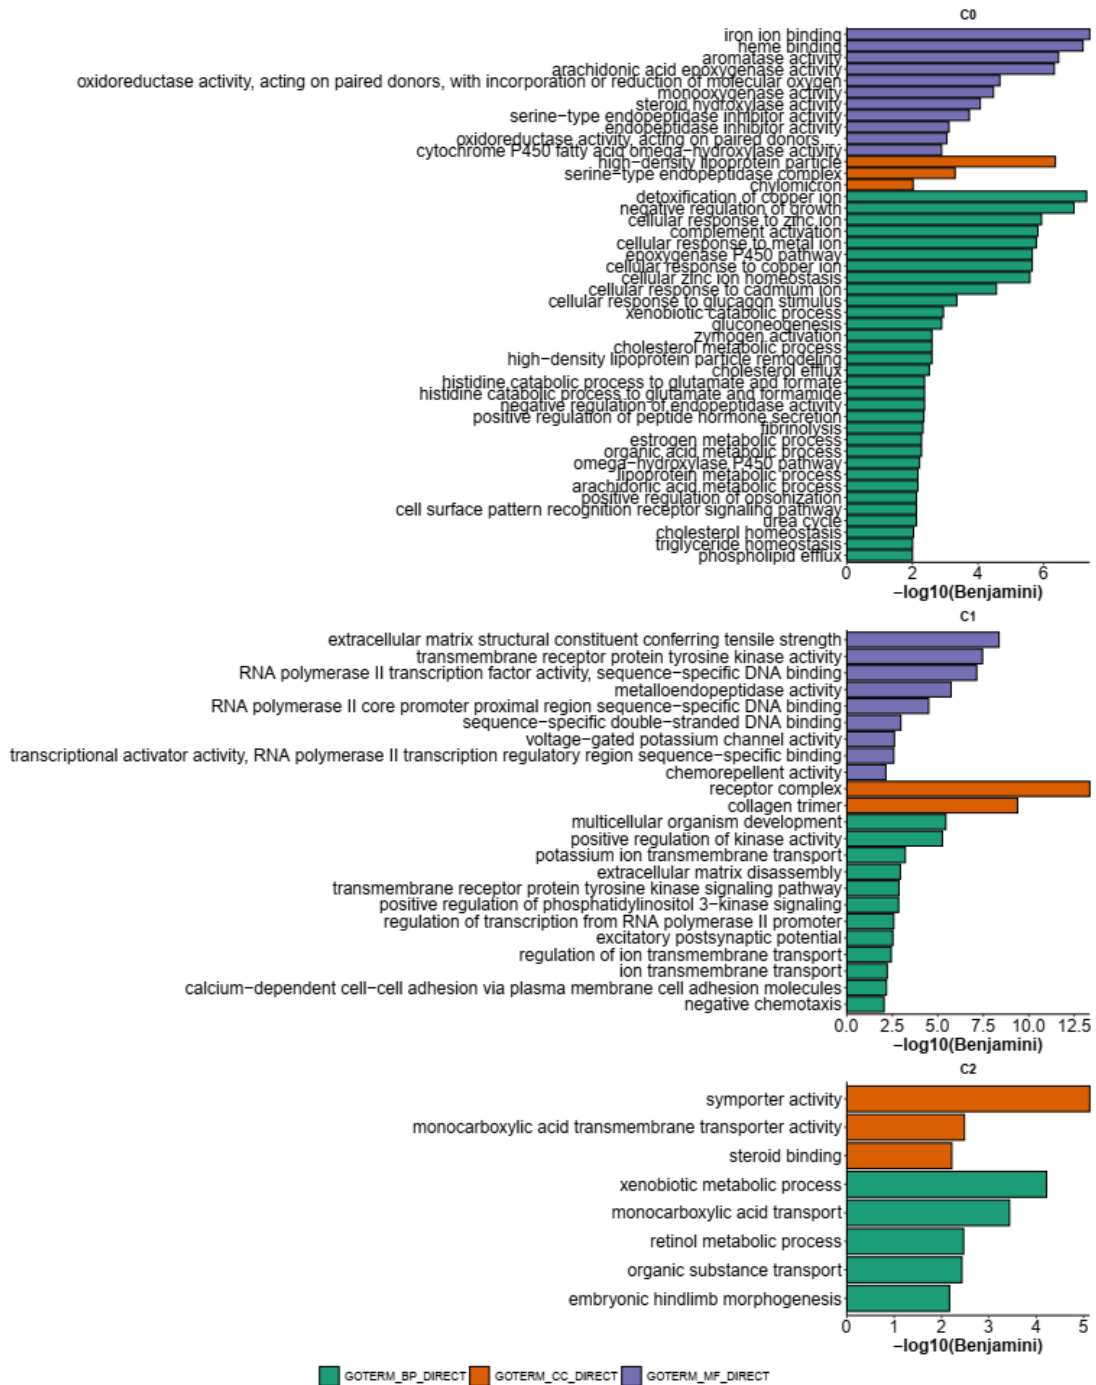

**Fig. S17. Gene Ontology enrichment for the subtype-specific up regulated genes in HCC.**
