# Supplementary material for: Generalizable transcriptome-based tumor malignant level evaluation and molecular subtyping towards precision oncology
Source: J Transl Med. 2024 May 28;22:512. doi: 10.1186/s12967-024-05326-0 (PMC11134716; doi:10.1186/s12967-024-05326-0)
Supplement: Supplementary file 1 — Supplementary Material 1 [file 12967_2024_5326_MOESM1_ESM.xlsx]

## Sheet: Suppl. Table S1
Suppl. Table S1. Statistics of the cancer analysis
Type	Cancer Name	Number of normal samples	Number of tumor samples	Down-regulated-saver	Oncogene-like	Suppressor-like	Up-regulated-saver	Fraction of samples used for training in SAHR model building	Number of tumor in training/testing subsets
BLCA	Bladder urothelial carcinoma	19	400	237	62	65	340	0.7	279/121
BRCA	Infiltrating duct carcinoma of the Breast	77	755	108	209	93	212	0.7	525/230
COAD	Colon adenocarcinoma	39	380	102	236	107	49	0.75	290/90
HCC	Hepatocellular carcinoma	48	352	19	504	99	48	0.5	169/183
LC	Laryngeal cancer	12	109	10	107	73	156	0.5	55/54
TC	Tongue cancer	13	123	30	35	73	117	0.7	90/33
KIRC	Kidney renal clear cell carcinoma	72	514	556	3907	487	292	0.5	263/251
KIRP	Kidney renal papillary cell carcinoma	32	289	257	469	130	199	0.7	204/85
LUAD	Lung adenocarcinoma	46	418	21	402	316	148	0.75	319/99
LUSC	Lung squamous cell carcinoma	45	462	284	77	21	238	0.5	241/221
STAD	Stomach adenocarcinoma	22	211	40	43	39	67	0.7	140/71
THCA	Thyroid carcinoma	54	454	64	55	40	66	0.7	316/138
UCEC	Endometrial endometrioid adenocarcinoma	19	396	111	226	95	97	0.7	276/120

## Sheet: Suppl. Table S2
Suppl. Table S2. Gender and ethnicity information of the samples used in the SAHR models
Cancer	Training dataset		Testing dataset
	Male/Female	White/Asian/Others	Male/Female	White/Asian/Others
BLCA	215/59	216/34/24	79/42	99/8/14
BRCA	0/516	329/23/164	0/224	153/21/50
COAD	150/128	131/5/142	48/38	44/2/40
HCC	109/59	79/74/15	126/52	90/77/11
LC	42/13	43/0/12	48/6	42/1/11
TC	59/31	80/4/6	21/12	29/1/3
KIRC	171/90	229/3/29	164/85	226/5/18
KIRP	147/54	135/5/61	63/22	69/1/15
LUAD	130/177	230/3/74	55/44	78/0/21
LUSC	179/61	167/7/66	158/57	150/1/64
STAD	79/46	88/12/25	41/22	47/5/11
THCA	84/231	199/30/86	37/101	96/15/27
UCEC	0/272	198/10/64	0/120	82/7/31

## Sheet: Suppl. Table S3
Suppl. Table S3. Differential expression and prognosis-association for known oncogenes and tumor suppressors
Gene Name	BLCA	BRCA	COAD	HCC	LC	TC	KIRC	KIRP	LUAD	LUSC	STAD	THCA	UCEC
CREBBP															up-regulated, not-survival-associated
ETV1		down-no-survival							down-no-survival	down-no-survival		Up-no-survival			oncogene-like
CD79B	down-no-survival		down-no-survival				Up-no-survival				down-no-survival	down-no-survival	down-no-survival		up-regulated-saver
BRCA1	Up-no-survival	Up-no-survival	Up-no-survival					oncogene-like	Up-no-survival	Up-no-survival	Up-no-survival		Up-no-survival		down-regulated, not-survival-associated
WAS			down-no-survival				oncogene-like	Up-no-survival		down-no-survival					suppressor-like
WWTR1	down-no-survival		down-no-survival						down-no-survival				down-no-survival		down-regulated-saver
CD74							Up-no-survival			down-no-survival
FAS			down-no-survival				Up-no-survival	Up-no-survival
CUL3					down-no-survival
FLT4		down-no-survival					Up-no-survival	down-no-survival	down-no-survival	down-regulated-saver			down-no-survival
CDH1							suppressor-like	down-no-survival	Up-no-survival	Up-no-survival			Up-no-survival
CDH10			down-no-survival	Up-no-survival			down-no-survival	down-regulated-saver	down-no-survival	down-regulated-saver
TNC					Up-no-survival	Up-no-survival		Up-no-survival	Up-no-survival	Up-no-survival		Up-no-survival
PREX2	down-no-survival	down-no-survival	down-no-survival				Up-no-survival		down-no-survival	down-no-survival
ROS1	Up-no-survival	Up-no-survival		Up-no-survival	Up-no-survival	Up-no-survival	down-regulated-saver	down-no-survival		down-no-survival	Up-no-survival	Up-no-survival	Up-no-survival
TNFRSF17			suppressor-like		Up-no-survival		Up-no-survival		Up-no-survival	Up-no-survival	down-no-survival		Up-no-survival
ARID1B
PIK3CB
KMT2C
PRDM1	down-no-survival				down-no-survival		Up-no-survival				down-no-survival	Up-no-survival
POLD1	Up-no-survival		Up-no-survival	Up-no-survival						Up-no-survival			Up-no-survival
CASP8
NTHL1		Up-no-survival	Up-no-survival
ERBB3					down-no-survival	down-no-survival						Up-no-survival	Up-no-survival
SPEN
CTNNA2		Up-no-survival		Up-no-survival					Up-no-survival	Up-no-survival			Up-no-survival
SMARCD1
FGFR2			down-no-survival			down-no-survival	down-no-survival	down-no-survival	down-no-survival			down-no-survival
KLF6	down-regulated-saver	down-no-survival		down-no-survival	down-no-survival				down-no-survival	down-no-survival		down-no-survival	down-no-survival
RHOA
ATP2B3		Up-no-survival	down-no-survival				down-regulated-saver	down-no-survival			down-regulated-saver
CBFB			Up-no-survival
FGFR3		Up-no-survival								Up-no-survival		Up-no-survival	Up-no-survival
TFE3
BCL3		Up-no-survival
CLTCL1				Up-no-survival		down-no-survival				Up-no-survival
FSTL3			oncogene-like		Up-no-survival	Up-no-survival	Up-no-survival			down-no-survival		Up-no-survival	down-no-survival
PRKACA
AFF4
SMC1A
FCGR2B			down-no-survival	down-no-survival			Up-no-survival	Up-no-survival
SDHA													Up-no-survival
SMARCE1
KDM5A
IGF2BP2	Up-no-survival			Up-no-survival	Up-no-survival	Up-no-survival		Up-no-survival		Up-no-survival	Up-no-survival	Up-no-survival
EED
ARHGEF10L					down-no-survival	down-no-survival
MLH1
NT5C2					down-no-survival
FGFR1	down-regulated-saver		down-no-survival
ARAF
N4BP2
MLLT10
CDH17				Up-no-survival				Up-no-survival	Up-no-survival	Up-no-survival
CIC
DNM2
KEAP1
PTPRC			down-no-survival				Up-no-survival			down-no-survival		down-no-survival
XPO1										Up-no-survival
PALB2										Up-no-survival
KAT6A
CYLD
FAT1						Up-no-survival			Up-no-survival	Up-no-survival
ATRX
MECOM		down-no-survival			down-no-survival		down-no-survival	down-no-survival				Up-no-survival	Up-no-survival
EPS15
BAX		up-regulated-saver					Up-no-survival	Up-no-survival				Up-no-survival	Up-no-survival
GNAS													Up-no-survival
CNOT3
GNA11			suppressor-like								down-no-survival
FUS
FH
ESR1	down-no-survival	Up-no-survival	down-no-survival	down-no-survival								Up-no-survival
MSH2				Up-no-survival						Up-no-survival	Up-no-survival
MAP3K1
JAK2													down-no-survival
ABL1	down-no-survival
LZTR1
SMARCB1										Up-no-survival
MAPK1
PATZ1
PDGFB					Up-no-survival			down-no-survival	down-regulated-saver	down-no-survival		Up-no-survival
MYH9													down-no-survival
EP300
HIF1A							down-no-survival
DICER1
TCL1A		Up-no-survival	down-no-survival		Up-no-survival	Up-no-survival					down-no-survival	down-no-survival
CCNB1IP1			Up-no-survival
ARHGAP5	down-regulated-saver												down-no-survival
NFATC2	down-no-survival	down-no-survival					Up-no-survival			down-no-survival			down-no-survival
SALL4	Up-no-survival	Up-no-survival	Up-no-survival	Up-no-survival	Up-no-survival	Up-no-survival	oncogene-like		Up-no-survival	Up-no-survival	Up-no-survival		Up-no-survival
STAG2
GATA1	down-no-survival		down-no-survival				Up-no-survival		down-no-survival	down-no-survival	down-no-survival		down-regulated-saver
CTCF
AXIN1								oncogene-like
TSC2
NBN
IKBKB
EIF3E
NDRG1			down-no-survival	Up-no-survival		Up-no-survival	up-regulated-saver			Up-no-survival
UBR5
LEPROTL1
ARHGEF10			up-regulated-saver				oncogene-like	Up-no-survival
ERCC2
LYL1			down-no-survival				Up-no-survival			down-no-survival	down-no-survival		down-no-survival
CCNE1	Up-no-survival	oncogene-like	Up-no-survival	oncogene-like	Up-no-survival	Up-no-survival		oncogene-like	oncogene-like	Up-no-survival	Up-no-survival		oncogene-like
AKT2
CD79A		up-regulated-saver	down-no-survival		Up-no-survival		Up-no-survival		Up-no-survival		down-no-survival	down-no-survival	Up-no-survival
PPP2R1A
JAK3					Up-no-survival		oncogene-like	Up-no-survival	Up-no-survival
PIK3R2			Up-no-survival	Up-no-survival			oncogene-like		Up-no-survival	Up-no-survival
ELL
CRTC1
CDK6					Up-no-survival	Up-no-survival				Up-no-survival	Up-no-survival
MET		down-no-survival	Up-no-survival		Up-no-survival	Up-no-survival	Up-no-survival	Up-no-survival	Up-no-survival		Up-no-survival	Up-no-survival
HOXA13	down-no-survival			Up-no-survival	Up-no-survival	Up-no-survival	oncogene-like	Up-no-survival	Up-no-survival	Up-no-survival	Up-no-survival	Up-no-survival	down-regulated-saver
EZH2	Up-no-survival	Up-no-survival	Up-no-survival	Up-no-survival			oncogene-like	oncogene-like	Up-no-survival	Up-no-survival	Up-no-survival		Up-no-survival
SFRP4			Up-no-survival	Up-no-survival	Up-no-survival	Up-no-survival		oncogene-like	Up-no-survival		Up-no-survival		down-no-survival
GATA3		Up-no-survival		suppressor-like	Up-no-survival		down-no-survival	down-no-survival
TLX1	Up-no-survival	Up-no-survival	Up-no-survival	Up-no-survival		down-no-survival	Up-no-survival		Up-no-survival	Up-no-survival	Up-no-survival		Up-no-survival
CPEB3	down-no-survival		down-no-survival	suppressor-like	suppressor-like	down-no-survival	suppressor-like	suppressor-like		down-no-survival
SUFU
LARP4B
CCDC6					down-no-survival
RNF43			Up-no-survival	Up-no-survival			down-no-survival		Up-no-survival	Up-no-survival	Up-no-survival		Up-no-survival
DDX5
HLF	down-no-survival	down-no-survival	suppressor-like		down-no-survival	down-no-survival			suppressor-like	down-no-survival	down-no-survival	down-no-survival	down-no-survival
YWHAE
PHOX2B			down-no-survival				Up-no-survival		Up-no-survival	Up-no-survival	down-no-survival
FBXW7
NSD2				Up-no-survival						Up-no-survival	Up-no-survival		Up-no-survival
ZBTB16	down-no-survival	down-no-survival	down-no-survival		down-no-survival	down-no-survival			down-no-survival	down-no-survival	down-no-survival	down-no-survival	down-no-survival
CCND1		Up-no-survival	Up-no-survival				up-regulated-saver					Up-no-survival
DDX6
CBL
CARS1
NUP98
POU2AF1			down-no-survival		Up-no-survival		Up-no-survival		Up-no-survival	Up-no-survival	down-no-survival	down-no-survival
GLI1	down-no-survival			Up-no-survival	Up-no-survival					Up-no-survival		down-no-survival	down-no-survival
SH2B3						Up-no-survival	Up-no-survival		down-no-survival	down-no-survival			down-no-survival
CDKN1B													down-no-survival
CHD4												Up-no-survival	oncogene-like
PTPN6							Up-no-survival	Up-no-survival					Up-no-survival
FANCE				Up-no-survival						Up-no-survival
SRSF3
CCNC
TFEB
CCND3										down-no-survival
DROSHA										Up-no-survival
PDGFRB				Up-no-survival	Up-no-survival	up-regulated-saver		down-no-survival			Up-no-survival		down-no-survival
BCL6		down-no-survival											down-no-survival
CBLB						Up-no-survival
FOXP1										down-no-survival			down-no-survival
ACVR1
SF3B1
BIRC6
NFE2L2											down-no-survival
MSH6										Up-no-survival
BCL9		Up-no-survival		Up-no-survival			down-no-survival		Up-no-survival
SFPQ
PRDM2
MYCL										Up-no-survival			Up-no-survival
AKT3	down-no-survival		down-no-survival		Up-no-survival				down-no-survival				down-no-survival
SDHB
ID3					Up-no-survival				down-no-survival		down-no-survival
MPL	down-no-survival	down-no-survival										down-no-survival	down-no-survival
ARID1A
STAG1
STK11
KMT2A													down-no-survival
CREB1
TNFAIP3	down-no-survival				Up-no-survival		Up-no-survival		down-no-survival
MYB	Up-no-survival					down-no-survival	oncogene-like	Up-no-survival		Up-no-survival	Up-no-survival		Up-no-survival
SGK1	down-no-survival	down-no-survival	down-no-survival	down-no-survival					down-no-survival		down-no-survival		down-no-survival
CCND2	down-no-survival	suppressor-like			Up-no-survival		Up-no-survival	Up-no-survival	down-no-survival			up-regulated-saver	down-no-survival
SET
PPP6C
NR4A3	down-no-survival	down-no-survival	down-no-survival	down-no-survival			down-no-survival	down-no-survival	down-no-survival	down-no-survival	down-no-survival	down-no-survival	down-no-survival
CSF3R		Up-no-survival			Up-no-survival	Up-no-survival	Up-no-survival	Up-no-survival	down-no-survival	down-no-survival
BCL11A				Up-no-survival			Up-no-survival	Up-no-survival		Up-no-survival		down-no-survival
CD274				down-no-survival				Up-no-survival
KCNJ5			down-no-survival	Up-no-survival			down-no-survival		suppressor-like	down-no-survival
SPOP	down-no-survival												down-no-survival
PIK3CA
CXCR4	down-no-survival	Up-no-survival			Up-no-survival		Up-no-survival	Up-no-survival				down-no-survival
ACVR2A
FLT3	down-no-survival	Up-no-survival	down-no-survival	down-no-survival						down-no-survival	down-no-survival	down-no-survival
PMS2
HNRNPA2B1
CDKN2C		down-no-survival		Up-no-survival			Up-no-survival	oncogene-like
ATF1
HOXC13	Up-no-survival	Up-no-survival	oncogene-like	oncogene-like	Up-no-survival	Up-no-survival	oncogene-like	oncogene-like	Up-no-survival	Up-no-survival	Up-no-survival	oncogene-like	Up-no-survival
HOXC11	Up-no-survival	Up-no-survival	oncogene-like	Up-no-survival	Up-no-survival	Up-no-survival		Up-no-survival	Up-no-survival	Up-no-survival	Up-no-survival		Up-no-survival
STIL	Up-no-survival	Up-no-survival	Up-no-survival	Up-no-survival		Up-no-survival		oncogene-like	Up-no-survival	Up-no-survival	Up-no-survival		Up-no-survival
PLCG1			Up-no-survival
DEK
SOX21			Up-no-survival	Up-no-survival			Up-no-survival		Up-no-survival	Up-no-survival	down-no-survival	down-no-survival	Up-no-survival
SOX9	Up-no-survival		Up-no-survival	Up-no-survival				Up-no-survival	Up-no-survival	Up-no-survival	Up-no-survival		Up-no-survival
MAX
KDM5C
CCR7		Up-no-survival	suppressor-like				Up-no-survival				down-no-survival	down-no-survival	Up-no-survival
BCL2L12	Up-no-survival	Up-no-survival	Up-no-survival		Up-no-survival				oncogene-like	Up-no-survival			oncogene-like
SBDS	down-no-survival												down-no-survival
SSX1	Up-no-survival	Up-no-survival		Up-no-survival	Up-no-survival		oncogene-like		Up-no-survival	Up-no-survival	Up-no-survival	Up-no-survival
SIX1	Up-no-survival		Up-no-survival	Up-no-survival		down-no-survival	oncogene-like	Up-no-survival	Up-no-survival	Up-no-survival	Up-no-survival		Up-no-survival
MAP2K2
PTPRB		down-no-survival		down-no-survival				down-no-survival	down-no-survival	down-no-survival			down-no-survival
SMARCA4													Up-no-survival
HIP1					Up-no-survival					down-no-survival		Up-no-survival
KDR		down-no-survival					up-regulated-saver	down-no-survival		down-no-survival			down-no-survival
DGCR8
POT1
SMO										Up-no-survival
HOXD11					Up-no-survival	up-regulated-saver		down-regulated-saver	oncogene-like	Up-no-survival	Up-no-survival
HOXD13				Up-no-survival	Up-no-survival	Up-no-survival	Up-no-survival		Up-no-survival	Up-no-survival	Up-no-survival		Up-no-survival
KNSTRN	Up-no-survival	Up-no-survival	Up-no-survival			Up-no-survival			Up-no-survival	Up-no-survival	Up-no-survival		Up-no-survival
MYOD1		Up-no-survival					Up-no-survival			Up-no-survival			Up-no-survival
USP6		down-no-survival			Up-no-survival	down-no-survival
FOXA1		Up-no-survival				down-no-survival		oncogene-like	Up-no-survival			oncogene-like	Up-no-survival
CBFA2T3			down-no-survival	down-no-survival			Up-no-survival		suppressor-like		down-no-survival		down-no-survival
AFDN					down-no-survival
DNMT1	Up-no-survival	Up-no-survival		Up-no-survival							Up-no-survival		Up-no-survival
ZNF331	down-no-survival						down-no-survival	suppressor-like	down-no-survival	down-regulated-saver	down-no-survival		down-regulated-saver
LATS1
TRAF7										Up-no-survival
RARA		Up-no-survival					Up-no-survival			down-no-survival		Up-no-survival
RAF1
PPARG		down-no-survival			down-no-survival	down-no-survival			down-no-survival	down-no-survival
H3-3B
MUTYH				Up-no-survival
CASP9
BTG1													down-no-survival
KRAS
MEN1	Up-no-survival
VHL	Up-no-survival
NOTCH2													down-no-survival
MYCN	Up-no-survival	Up-no-survival	Up-no-survival	Up-no-survival			suppressor-like	down-no-survival	Up-no-survival	Up-no-survival			Up-no-survival
IL6ST	down-no-survival		down-no-survival							down-no-survival			down-no-survival
CDC73
PDGFRA	down-no-survival	down-no-survival	down-no-survival	down-no-survival			down-no-survival	down-no-survival				down-no-survival	down-no-survival
ERCC5
APC			down-no-survival
HNF1A					up-regulated-saver				Up-no-survival				Up-no-survival
LMO2		down-no-survival	down-no-survival		down-no-survival	suppressor-like		down-no-survival	down-no-survival	down-no-survival
CDK4			Up-no-survival						Up-no-survival	Up-no-survival
ACVR1B
TEC					down-no-survival	down-no-survival				down-no-survival			Up-no-survival
MDM2								Up-no-survival
PAX3		down-no-survival	Up-no-survival	Up-no-survival	Up-no-survival		oncogene-like		Up-no-survival	Up-no-survival	Up-no-survival
TMEM127
USP44		down-no-survival	down-no-survival				down-no-survival	down-no-survival	suppressor-like	down-no-survival
RAC1
BRIP1	Up-no-survival	Up-no-survival	Up-no-survival	Up-no-survival			Up-no-survival	oncogene-like	Up-no-survival	Up-no-survival	Up-no-survival	Up-no-survival	Up-no-survival
KAT7
ABI1
KLF4	down-no-survival	down-no-survival	down-no-survival	down-no-survival	down-no-survival	down-no-survival			down-no-survival	down-no-survival	down-no-survival		down-no-survival
XPA
MYC	down-no-survival	down-no-survival	Up-no-survival	down-no-survival			Up-no-survival	oncogene-like					down-no-survival
PIM1	down-no-survival			down-no-survival	down-no-survival						down-no-survival		down-no-survival
HMGA1	Up-no-survival	Up-no-survival	Up-no-survival	oncogene-like				oncogene-like	oncogene-like	Up-no-survival			Up-no-survival
KNL1	Up-no-survival	Up-no-survival				Up-no-survival		down-regulated-saver	oncogene-like	Up-no-survival	Up-no-survival		Up-no-survival
FBXO11
BARD1		Up-no-survival		Up-no-survival					Up-no-survival	Up-no-survival
IDH1													Up-no-survival
USP8
RAP1GDS1
ETV6
ETNK1			down-no-survival
LRIG3		down-no-survival							Up-no-survival	Up-no-survival
BRCA2	Up-no-survival	Up-no-survival	Up-no-survival	Up-no-survival			Up-no-survival	oncogene-like		Up-no-survival	Up-no-survival		Up-no-survival
RB1
SETD1B
NCOA2
PML							oncogene-like
POLG
NTRK3	down-no-survival	down-no-survival	down-no-survival	down-no-survival		down-no-survival		down-no-survival	down-no-survival	down-regulated-saver	down-no-survival	Up-no-survival	down-no-survival
ZFHX3
CDH11		Up-no-survival	Up-no-survival	Up-no-survival	Up-no-survival	Up-no-survival		down-no-survival			Up-no-survival	Up-no-survival	down-no-survival
NCOR1				suppressor-like
CLTC		Up-no-survival
TP53
SMAD4
ERBB2	Up-no-survival	Up-no-survival			down-no-survival	down-no-survival	suppressor-like
BRD4
SH3GL1					down-no-survival		oncogene-like
AKT1
PRDM16		down-no-survival		Up-no-survival			down-no-survival	down-no-survival		down-no-survival	down-no-survival	down-no-survival
BCL10	down-no-survival
SDHC
ABL2					Up-no-survival	Up-no-survival
SETDB1
TPM3		Up-no-survival											Up-no-survival
RIT1							up-regulated-saver
ASXL2
AFF3	down-no-survival		down-no-survival				up-regulated-saver		down-no-survival	down-no-survival	down-no-survival		down-no-survival
ACKR3		down-no-survival				Up-no-survival	Up-no-survival			Up-no-survival
FANCD2	Up-no-survival	Up-no-survival	Up-no-survival	Up-no-survival					Up-no-survival	Up-no-survival	up-regulated-saver		Up-no-survival
LPP	down-no-survival		down-no-survival										down-no-survival
PIK3R1	down-no-survival	down-no-survival							suppressor-like
ARHGAP26		down-no-survival					up-regulated-saver
NFKBIE		Up-no-survival			Up-no-survival		Up-no-survival						Up-no-survival
RSPO3	down-no-survival	down-no-survival	down-no-survival	down-no-survival		down-no-survival	down-no-survival	down-no-survival		down-no-survival		down-no-survival	down-no-survival
EGFR		down-no-survival				oncogene-like	up-regulated-saver			Up-no-survival
KDM6A
ZMYM3
NSD3										Up-no-survival
RSPO2	down-no-survival	Up-no-survival	down-no-survival					down-no-survival	down-no-survival	down-no-survival	down-no-survival	Up-no-survival	oncogene-like
CDKN2A	Up-no-survival	Up-no-survival	Up-no-survival	Up-no-survival	Up-no-survival	Up-no-survival	oncogene-like	Up-no-survival	Up-no-survival	Up-no-survival	Up-no-survival	Up-no-survival	Up-no-survival
NOTCH1
ZEB1	down-no-survival	down-no-survival	down-no-survival						down-no-survival	down-no-survival			down-no-survival
A1CF	up-regulated-saver		down-no-survival	down-no-survival				down-no-survival	Up-no-survival	Up-no-survival
TCF7L2		down-no-survival											down-no-survival
ATM
HMGA2	Up-no-survival	Up-no-survival	Up-no-survival	Up-no-survival	Up-no-survival	Up-no-survival	Up-no-survival	oncogene-like	oncogene-like	Up-no-survival	Up-no-survival	Up-no-survival	Up-no-survival
LATS2	down-no-survival								down-no-survival	down-no-survival			down-no-survival
EXT2						Up-no-survival
FLI1		down-no-survival	down-no-survival				Up-no-survival		down-no-survival	down-no-survival			down-no-survival
CYSLTR2			down-no-survival		Up-no-survival	up-regulated-saver	Up-no-survival	Up-no-survival				Up-no-survival	down-no-survival
SETBP1	down-regulated-saver		down-no-survival					down-no-survival					down-no-survival
PTPRK						Up-no-survival
RAD17
RANBP2
PTPRD	down-regulated-saver			down-no-survival	Up-no-survival	Up-no-survival	down-no-survival		down-no-survival
MSI2			Up-no-survival				down-no-survival		Up-no-survival	Up-no-survival
XPC										down-no-survival
FLCN
GNAQ	down-no-survival		down-no-survival						down-no-survival	down-no-survival
WIF1		down-no-survival	Up-no-survival	Up-no-survival		down-no-survival	down-no-survival		down-no-survival	down-no-survival		Up-no-survival	Up-no-survival
PHF6										Up-no-survival
KAT6B	down-no-survival
BUB1B	Up-no-survival	Up-no-survival	Up-no-survival	Up-no-survival		Up-no-survival	oncogene-like	Up-no-survival	oncogene-like	Up-no-survival	Up-no-survival		Up-no-survival
NRG1		down-no-survival	suppressor-like	down-no-survival	Up-no-survival	Up-no-survival		oncogene-like	down-no-survival		down-no-survival
CACNA1D		Up-no-survival	Up-no-survival			down-no-survival				down-no-survival	Up-no-survival
KIT		down-no-survival	down-no-survival		down-no-survival	down-no-survival		down-no-survival			down-no-survival	down-no-survival	down-no-survival
ERG	down-no-survival	down-no-survival						down-no-survival	down-no-survival	down-no-survival			down-no-survival
CREB3L1	down-no-survival	Up-no-survival		oncogene-like		down-no-survival				down-no-survival			Up-no-survival
BRAF
SLC34A2	Up-no-survival		Up-no-survival					up-regulated-saver		down-no-survival		Up-no-survival
TNFRSF14							Up-no-survival	Up-no-survival
SKI
FANCC				down-no-survival									Up-no-survival
ELK4
RUNX1			oncogene-like				oncogene-like	Up-no-survival			Up-no-survival	Up-no-survival	Up-no-survival
U2AF1							oncogene-like
FGFR4		Up-no-survival	Up-no-survival		Up-no-survival				down-no-survival	down-no-survival	Up-no-survival		Up-no-survival
SRSF2
TAL1	down-no-survival	down-no-survival	down-no-survival					down-no-survival	down-no-survival	down-no-survival			down-no-survival
JAK1													suppressor-like
FUBP1
DDR2	down-no-survival	down-no-survival	down-no-survival					down-no-survival	down-no-survival	down-no-survival			down-no-survival
REL
H3-3A		Up-no-survival
ERCC3
ELF3					down-no-survival	down-no-survival	down-no-survival	Up-no-survival				Up-no-survival	Up-no-survival
FEV			down-no-survival								down-no-survival
TGFBR2	down-no-survival	down-no-survival						down-no-survival	down-no-survival	down-no-survival			down-no-survival
FCRL4		up-regulated-saver	down-no-survival				Up-no-survival		Up-no-survival	Up-no-survival	down-no-survival	down-no-survival	Up-no-survival
FBLN2	down-no-survival	down-no-survival	down-no-survival		Up-no-survival			down-no-survival				down-no-survival	down-no-survival
PTPN13			Up-no-survival	down-no-survival	down-no-survival		down-no-survival				down-no-survival		down-no-survival
BAP1
PBRM1
CASP3
EBF1	down-no-survival	down-no-survival	down-no-survival	Up-no-survival	down-no-survival			down-no-survival	down-no-survival	down-no-survival			down-no-survival
TERT	Up-no-survival	Up-no-survival	Up-no-survival	Up-no-survival	Up-no-survival	Up-no-survival	Up-no-survival	Up-no-survival	Up-no-survival	Up-no-survival	Up-no-survival		oncogene-like
TLX3		Up-no-survival	Up-no-survival		Up-no-survival					Up-no-survival			Up-no-survival
HEY1	oncogene-like			Up-no-survival	Up-no-survival		Up-no-survival			Up-no-survival			Up-no-survival
PSIP1
SYK													Up-no-survival
WNK2				Up-no-survival		down-no-survival		Up-no-survival	Up-no-survival	Up-no-survival
WRN
TSHR			down-no-survival		Up-no-survival		Up-no-survival		Up-no-survival	Up-no-survival			down-no-survival
CDX2	Up-no-survival	Up-no-survival		Up-no-survival	oncogene-like	Up-no-survival	oncogene-like		Up-no-survival	Up-no-survival			Up-no-survival
TSC1
RET		Up-no-survival		down-no-survival	oncogene-like			down-no-survival	Up-no-survival	Up-no-survival		Up-no-survival
LMO1		oncogene-like	down-no-survival	Up-no-survival				down-regulated-saver	Up-no-survival	Up-no-survival			Up-no-survival
B2M			down-no-survival				Up-no-survival			down-no-survival
NAB2												Up-no-survival
STAT6
SMAD3													down-no-survival
CDK12
KMT2D
SDHAF2													Up-no-survival
CTNNB1
RFWD3									Up-no-survival	Up-no-survival
RHOH			down-no-survival				Up-no-survival				down-no-survival	down-no-survival
FEN1	Up-no-survival	Up-no-survival	Up-no-survival	Up-no-survival		Up-no-survival			Up-no-survival	Up-no-survival			Up-no-survival
STAT3
AXIN2			Up-no-survival	Up-no-survival			down-no-survival			down-no-survival
IL7R					Up-no-survival	Up-no-survival	Up-no-survival		down-no-survival	down-no-survival		down-no-survival
LRP1B			down-no-survival			down-no-survival	down-no-survival		Up-no-survival	Up-no-survival	down-no-survival	down-no-survival
TET2
MAP2K1				down-no-survival
AR			down-no-survival	down-no-survival	down-no-survival	down-no-survival		up-regulated-saver		down-no-survival	down-no-survival	down-no-survival	down-no-survival
MN1	down-no-survival							down-no-survival		Up-no-survival			down-no-survival
ZRSR2
CNBP
CTNND2		Up-no-survival	down-no-survival	Up-no-survival						down-no-survival			Up-no-survival
BRD3
MGMT
SIX2		Up-no-survival	Up-no-survival	Up-no-survival					Up-no-survival	Up-no-survival			Up-no-survival
PPM1D
ALK		down-no-survival	down-no-survival		Up-no-survival		Up-no-survival	Up-no-survival			down-no-survival	Up-no-survival
CHST11		Up-no-survival			Up-no-survival	Up-no-survival	oncogene-like	Up-no-survival				Up-no-survival
ASXL1
CAMTA1
BCL2	down-no-survival		down-no-survival									down-no-survival	down-no-survival
PTEN
MALT1
MYD88				down-no-survival
CHD2
EIF1AX
HRAS										Up-no-survival			Up-no-survival
ATR											Up-no-survival
DDIT3					Up-no-survival			Up-no-survival		Up-no-survival
SMAD2
ERCC4
RMI2	Up-no-survival	Up-no-survival		Up-no-survival	Up-no-survival	Up-no-survival			Up-no-survival	Up-no-survival		Up-no-survival	Up-no-survival
ETV4	Up-no-survival		Up-no-survival	Up-no-survival			down-no-survival		Up-no-survival	Up-no-survival	Up-no-survival	Up-no-survival	Up-no-survival
FOXR1							oncogene-like
POLE									Up-no-survival	Up-no-survival			Up-no-survival
JUN	down-no-survival	down-no-survival		down-no-survival					down-no-survival	down-no-survival	down-no-survival	down-no-survival	down-no-survival
MLF1					Up-no-survival							down-regulated-saver
DDX10			Up-no-survival							Up-no-survival
CD28	down-no-survival		down-no-survival				Up-no-survival					down-no-survival
ERBB4			down-regulated-saver		down-no-survival	down-no-survival	down-no-survival	down-no-survival	down-no-survival	down-no-survival		down-no-survival
MAF		down-no-survival	down-no-survival								down-no-survival		down-no-survival
PER1	down-no-survival	down-no-survival	down-no-survival						down-no-survival	down-no-survival	down-no-survival		down-no-survival
CALR	oncogene-like	Up-no-survival											Up-no-survival
PTPN11
GATA2							down-no-survival	down-no-survival	down-no-survival	down-no-survival
GPC5			down-no-survival	Up-no-survival			down-no-survival	down-no-survival	down-no-survival	down-no-survival
CIITA							Up-no-survival			down-no-survival
PRF1					Up-no-survival		Up-no-survival		down-no-survival	down-no-survival
SOX2		Up-no-survival		Up-no-survival					Up-no-survival	Up-no-survival			Up-no-survival
SETD2
PLAG1	Up-no-survival			Up-no-survival	Up-no-survival	Up-no-survival	down-regulated-saver			Up-no-survival		Up-no-survival	down-no-survival
IDH2		Up-no-survival				down-no-survival	down-no-survival	down-no-survival	Up-no-survival	Up-no-survival			Up-no-survival
CREB3L2													down-no-survival
P2RY8	down-no-survival		down-no-survival				up-regulated-saver				down-no-survival
RAD51B													down-no-survival
EXT1					Up-no-survival	Up-no-survival
CSF1R			down-no-survival	down-no-survival			Up-no-survival	Up-no-survival		down-no-survival
LCK							Up-no-survival					down-no-survival
RBM10
EWSR1
FANCF	Up-no-survival	up-regulated-saver
BCOR
GRIN2A			down-no-survival	Up-no-survival			Up-no-survival	down-no-survival	Up-no-survival	Up-no-survival			down-no-survival
TENT5C	down-no-survival		suppressor-like	down-no-survival				down-no-survival			down-no-survival
ZNRF3			Up-no-survival				suppressor-like
MACC1			oncogene-like		down-no-survival	down-no-survival		up-regulated-saver		down-no-survival		Up-no-survival
CHEK2		Up-no-survival					oncogene-like	Up-no-survival	Up-no-survival	Up-no-survival			Up-no-survival
FOXL2	Up-no-survival		Up-no-survival		Up-no-survival	Up-no-survival	Up-no-survival	oncogene-like	Up-no-survival	Up-no-survival	Up-no-survival		down-no-survival
CCR4	down-no-survival	Up-no-survival					Up-no-survival
MAML2		down-no-survival								down-no-survival
NUTM1			down-no-survival				oncogene-like			Up-no-survival
AMER1										Up-no-survival
WT1		Up-no-survival	Up-no-survival		Up-no-survival	Up-no-survival	down-regulated-saver	down-no-survival			Up-no-survival	oncogene-like	down-no-survival
ROBO2		Up-no-survival	Up-no-survival			down-no-survival	suppressor-like	down-no-survival	down-no-survival	down-no-survival			Up-no-survival
SOCS1					Up-no-survival	Up-no-survival		down-no-survival
PBX1	down-no-survival		down-no-survival			down-no-survival	suppressor-like	down-no-survival					down-no-survival
IKZF1			down-no-survival				Up-no-survival			down-no-survival		down-no-survival
PTCH1	down-regulated-saver	down-regulated-saver
TAL2		Up-no-survival		Up-no-survival				down-no-survival		Up-no-survival
NF2
MITF	down-no-survival	down-no-survival	down-no-survival		down-no-survival	down-no-survival			down-no-survival	down-no-survival			down-no-survival
FANCA	Up-no-survival	Up-no-survival	Up-no-survival	Up-no-survival		Up-no-survival	oncogene-like	Up-no-survival	Up-no-survival	Up-no-survival	Up-no-survival		Up-no-survival
ARID2
FHIT					down-no-survival	down-no-survival
PTPRT			down-no-survival			down-no-survival	down-no-survival	down-no-survival	down-no-survival				down-no-survival
PAX5		Up-no-survival	down-no-survival		Up-no-survival	Up-no-survival		down-no-survival	Up-no-survival			down-no-survival	Up-no-survival
FAT4	down-regulated-saver	down-no-survival	down-no-survival	down-no-survival				down-no-survival	down-no-survival	down-no-survival		down-no-survival	down-no-survival
TRRAP
NCOR2
NF1
ARHGEF12
SRC				Up-no-survival
SND1
BLM	Up-no-survival	Up-no-survival	Up-no-survival	Up-no-survival	Up-no-survival		Up-no-survival	oncogene-like	Up-no-survival	Up-no-survival	Up-no-survival		Up-no-survival
TRIM33
PDCD1LG2				down-no-survival		Up-no-survival	Up-no-survival						down-no-survival
SIRPA		down-no-survival				Up-no-survival	Up-no-survival	Up-no-survival	down-no-survival
CARD11							Up-no-survival	Up-no-survival	oncogene-like	Up-no-survival
NTRK1					Up-no-survival	Up-no-survival	down-regulated-saver	down-no-survival
BAZ1A							Up-no-survival	Up-no-survival					Up-no-survival
MDM4
MTOR							down-no-survival
ZNF521	down-regulated-saver							down-no-survival		down-no-survival			down-no-survival
GRM3	Up-no-survival							down-no-survival	down-no-survival	down-no-survival
MAFB												down-no-survival
DAXX
SDHD			down-no-survival
POU5F1	up-regulated-saver			Up-no-survival		Up-no-survival	Up-no-survival	Up-no-survival	Up-no-survival		Up-no-survival		Up-no-survival
TRIM27
CRLF2	down-no-survival			Up-no-survival			Up-no-survival	Up-no-survival	Up-no-survival	down-no-survival		Up-no-survival	down-no-survival
OLIG2		Up-no-survival					Up-no-survival		Up-no-survival	oncogene-like		Up-no-survival
NRAS
MTCP1	up-regulated-saver						oncogene-like	Up-no-survival
DDX3X
FANCG	Up-no-survival		Up-no-survival	Up-no-survival	Up-no-survival		oncogene-like	oncogene-like	Up-no-survival	Up-no-survival			Up-no-survival
SSX2
ETV5		down-no-survival	Up-no-survival		Up-no-survival				suppressor-like			Up-no-survival
CEBPA	Up-no-survival	down-no-survival					Up-no-survival	up-regulated-saver
NCOA4			down-no-survival
SSX4
TAF15
H3C2	Up-no-survival	Up-no-survival	Up-no-survival	Up-no-survival	Up-no-survival	Up-no-survival	Up-no-survival	Up-no-survival	Up-no-survival	Up-no-survival			Up-no-survival

## Sheet: Suppl. Table S4
Suppl. Table S4. List of dysregulated and prognosis-associated genes across cancers
Gene Name	BLCA	BRCA	COAD	HCC	LC	TC	KIRC	KIRP	LUAD	LUSC	STAD	THCA	UCEC
TSPAN6					down-regulated-saver	down-no-survival	down-no-survival		up-no-survival	up-no-survival					up-regulated, not-survival-associated
TNMD		down-no-survival			down-no-survival	down-no-survival		down-no-survival		down-no-survival			down-no-survival		oncogene-like
DPM1															up-regulated-saver
SCYL3															down-regulated, not-survival-associated
C1orf112	up-no-survival	up-no-survival	up-no-survival						up-no-survival	up-no-survival	up-no-survival		up-no-survival		suppressor-like
FGR							up-no-survival	up-no-survival	down-no-survival	down-no-survival			down-no-survival		down-regulated-saver
CFH	down-no-survival	down-no-survival	down-no-survival		down-no-survival
FUCA2
GCLC									up-no-survival	up-no-survival
NFYA
STPG1			down-no-survival
NIPAL3
LAS1L			up-no-survival
ENPP4					down-no-survival	down-no-survival				down-no-survival
SEMA3F		up-regulated-saver	up-no-survival	up-no-survival	down-no-survival		up-regulated-saver			up-no-survival		up-no-survival
CFTR				down-no-survival	down-no-survival	down-no-survival	down-no-survival		suppressor-like	down-no-survival
ANKIB1
CYP51A1							suppressor-like	down-no-survival
KRIT1
RAD52
BAD											down-no-survival
LAP3
CD99							up-no-survival
HS3ST1	down-no-survival				down-no-survival	down-no-survival		up-no-survival	up-no-survival	up-no-survival
AOC1		up-no-survival	down-no-survival	down-no-survival	down-no-survival			suppressor-like	up-no-survival	up-no-survival	down-no-survival	up-no-survival	up-no-survival
WNT16									up-regulated-saver	up-no-survival			up-no-survival
HECW1			up-no-survival	up-no-survival	up-no-survival		down-no-survival	down-no-survival	up-no-survival	oncogene-like		down-no-survival	up-no-survival
MAD1L1					up-no-survival	up-no-survival	up-no-survival	up-no-survival
LASP1
SNX11
TMEM176A							up-regulated-saver
M6PR
KLHL13	down-no-survival	down-no-survival					down-no-survival	down-regulated-saver		up-no-survival			down-no-survival
CYP26B1		down-no-survival	down-no-survival			up-no-survival	down-no-survival	down-no-survival
ICA1					down-no-survival	suppressor-like			up-no-survival				up-no-survival
DBNDD1	oncogene-like	up-no-survival	up-no-survival	up-no-survival	down-no-survival	down-no-survival		up-no-survival	up-no-survival	up-no-survival			up-no-survival
ALS2
CASP10
CFLAR										down-no-survival
TFPI		down-no-survival					up-no-survival	up-no-survival		down-no-survival		down-no-survival	down-no-survival
NDUFAF7
RBM5
MTMR7				up-no-survival
SLC7A2		up-no-survival	down-no-survival	suppressor-like		down-no-survival		down-no-survival	up-no-survival	down-no-survival		up-no-survival	down-no-survival
ARF5													up-no-survival
SARM1						down-no-survival							down-no-survival
POLDIP2
PLXND1					up-no-survival		up-no-survival			down-no-survival		up-no-survival	down-no-survival
AK2
CD38			down-no-survival		up-no-survival		up-no-survival					suppressor-like
FKBP4		up-no-survival							up-no-survival	up-no-survival
KDM1A
RBM6
CAMKK1	down-no-survival						up-no-survival	up-regulated-saver
RECQL						up-no-survival
VPS50
HSPB6	down-regulated-saver	down-no-survival	down-no-survival		down-no-survival	down-no-survival		down-regulated-saver	down-no-survival	down-no-survival	down-no-survival	down-no-survival	down-no-survival
ARHGAP33			up-no-survival	up-no-survival	up-no-survival		oncogene-like		up-no-survival	up-no-survival
NDUFAB1
PDK4	down-no-survival	down-no-survival	down-no-survival	down-no-survival	down-no-survival	down-no-survival		down-no-survival	down-no-survival	down-no-survival	down-no-survival		down-no-survival
SLC22A16				up-no-survival			up-no-survival				oncogene-like	up-no-survival
ZMYND10	up-no-survival	up-no-survival		up-no-survival				up-regulated-saver	down-no-survival	down-no-survival
ABCB5	down-no-survival	down-no-survival	down-no-survival	oncogene-like			up-no-survival	up-no-survival					down-no-survival
ARX	up-no-survival	up-no-survival		up-no-survival	down-no-survival	down-no-survival	oncogene-like	oncogene-like	up-no-survival			up-no-survival	oncogene-like
SLC25A13									up-no-survival	up-no-survival			up-no-survival
ST7										down-no-survival
CDC27
SLC4A1		down-no-survival	down-no-survival	down-no-survival	up-no-survival		down-no-survival	down-no-survival	down-no-survival	down-no-survival
CALCR		down-no-survival					up-no-survival	down-regulated-saver	up-no-survival		up-no-survival		up-no-survival
HCCS
DVL2
PRSS22		up-no-survival	up-no-survival		down-no-survival		down-regulated-saver	down-no-survival	up-no-survival	oncogene-like		up-no-survival	up-no-survival
UPF1
SKAP2		down-no-survival				up-no-survival
SLC25A5							down-no-survival
MCUB							up-no-survival	up-no-survival
HOXA11		up-no-survival		up-no-survival	up-no-survival	up-no-survival	down-no-survival		up-no-survival	up-no-survival	up-no-survival	up-no-survival	down-no-survival
POLR2J								up-no-survival					up-no-survival
DHX33
MEOX1	down-no-survival	down-no-survival	down-no-survival	up-no-survival									down-no-survival
THSD7A		down-no-survival	down-no-survival				suppressor-like	down-no-survival		down-regulated-saver			down-no-survival
LIG3										up-no-survival
RPAP3
ACSM3		down-no-survival		down-no-survival	down-no-survival	down-no-survival	down-no-survival			down-no-survival
REXO5				up-no-survival					up-no-survival	up-no-survival
CIAPIN1
SPPL2B													up-no-survival
FAM214B
COPZ2					oncogene-like								down-no-survival
PRKAR2B	down-no-survival	down-no-survival	down-no-survival	down-no-survival		down-no-survival	down-no-survival				down-no-survival		down-no-survival
MSL3
CREBBP
TSPOAP1			up-no-survival			down-no-survival
MPO		down-no-survival		down-no-survival	down-no-survival	down-no-survival		up-no-survival		down-no-survival
PON1				down-no-survival			down-regulated-saver	down-no-survival	up-no-survival	down-no-survival	up-no-survival
GCFC2
WDR54	oncogene-like		up-no-survival		up-no-survival	up-no-survival	up-no-survival
CROT			down-no-survival		down-no-survival		suppressor-like				down-no-survival
ABCB4	down-no-survival				down-no-survival		up-regulated-saver	up-no-survival	up-no-survival
KMT2E
RHBDD2
SOX8						down-no-survival		up-no-survival				up-no-survival
IBTK
ZNF195											up-no-survival
MYCBP2		down-no-survival											down-no-survival
FBXL3													down-no-survival
ITGAL		up-regulated-saver	down-no-survival				up-no-survival	up-no-survival	down-no-survival	down-no-survival
PDK2						down-no-survival							down-no-survival
ITGA3	up-no-survival				up-no-survival	up-no-survival		up-no-survival				up-no-survival
ZFX													down-no-survival
LAMP2
ITGA2B	up-no-survival				up-no-survival								up-regulated-saver
ASB4		down-no-survival	oncogene-like			down-no-survival				down-no-survival	up-no-survival
GDE1
REX1BD			up-no-survival										up-no-survival
CRLF1			down-regulated-saver	up-no-survival					up-no-survival			up-no-survival	up-no-survival
OSBPL7								up-no-survival			down-no-survival
TMEM98				up-no-survival				up-no-survival				up-no-survival
YBX2				up-no-survival			up-no-survival	up-no-survival	up-no-survival	up-no-survival
KRT33A	up-no-survival				down-no-survival	down-no-survival	up-no-survival	up-no-survival		up-no-survival			up-no-survival
MAP3K14							up-no-survival
ABCC8	down-no-survival		down-no-survival	up-no-survival		down-no-survival
CACNG3
TMEM132A	up-no-survival	up-no-survival	up-no-survival	up-no-survival	up-no-survival	up-no-survival	oncogene-like	up-no-survival	up-no-survival	up-no-survival		up-no-survival	up-no-survival
AP2B1
TAC1		down-no-survival				down-no-survival	down-no-survival					down-no-survival	up-no-survival
ZNF263
CX3CL1	down-no-survival	down-no-survival							down-no-survival	down-no-survival		up-no-survival
SPATA20
CACNA1G		down-no-survival		up-no-survival				oncogene-like	up-no-survival		down-no-survival		down-no-survival
TNFRSF12A		up-no-survival	up-no-survival		up-no-survival	up-no-survival		up-no-survival				up-no-survival
DLX6	up-no-survival	up-no-survival	up-regulated-saver	up-no-survival	up-no-survival	up-no-survival	up-no-survival		up-no-survival	up-no-survival	up-no-survival		up-no-survival
MAP3K9				oncogene-like	down-no-survival		down-no-survival						up-no-survival
RALA
BAIAP2L1		up-no-survival							up-no-survival	up-no-survival			up-no-survival
KDM7A
ETV1		down-no-survival							down-no-survival	down-no-survival		Up-no-survival
AGK
ALDH3B1					down-no-survival	down-no-survival		up-no-survival		down-no-survival		up-no-survival
TTC22			down-no-survival		down-no-survival					up-no-survival	down-no-survival
PHTF2
CCL26			up-no-survival	up-no-survival		up-no-survival		down-no-survival	up-no-survival	up-no-survival	up-no-survival	up-no-survival	down-no-survival
FARP2
USH1C				up-no-survival					up-no-survival	up-no-survival		down-no-survival	up-no-survival
GGCT	up-no-survival	oncogene-like	up-no-survival						up-no-survival	up-no-survival		up-no-survival	up-no-survival
DBF4	up-no-survival	up-no-survival	up-no-survival						up-no-survival	up-no-survival	up-no-survival		up-no-survival
TBXA2R				down-no-survival	up-no-survival	up-no-survival		down-no-survival	down-no-survival	down-no-survival			down-no-survival
IFRD1								up-no-survival
LGALS14				up-no-survival			oncogene-like					up-no-survival
COX10
GTF2IRD1		up-no-survival	up-no-survival	up-no-survival						up-no-survival			up-no-survival
PAF1
VPS41
ARHGAP44			down-no-survival	up-no-survival		down-no-survival			down-no-survival	down-no-survival			down-no-survival
ELAC2
SCIN		up-no-survival	down-no-survival	oncogene-like	down-no-survival	down-no-survival	down-no-survival		up-no-survival		down-no-survival	up-no-survival
ARSD
PNPLA4
MYH13				oncogene-like		down-no-survival	oncogene-like	up-no-survival
ADIPOR2
CDKL3			up-no-survival
UPP2							down-no-survival	down-no-survival
PRSS21	up-no-survival				up-no-survival		up-no-survival	up-no-survival		up-no-survival	oncogene-like		up-no-survival
MARK4
PROM1						down-no-survival	down-no-survival		up-no-survival			down-no-survival	up-no-survival
CCDC124													up-no-survival
CEACAM21							up-no-survival		down-no-survival	down-no-survival	down-no-survival		up-no-survival
PAFAH1B1
NOS2	up-no-survival			up-no-survival		down-no-survival		down-no-survival		up-no-survival		up-no-survival
DNAH9	down-no-survival	down-no-survival					down-no-survival		down-no-survival	down-no-survival
KIAA0100
SLC13A2		down-no-survival	suppressor-like		down-no-survival	down-no-survival	down-no-survival	down-no-survival			down-no-survival	down-no-survival	up-no-survival
GAS7	down-no-survival	down-no-survival	down-no-survival		down-no-survival	down-no-survival			down-no-survival	down-no-survival			suppressor-like
TRAPPC6A													up-no-survival
MATK			down-no-survival		up-no-survival		up-no-survival	up-no-survival	down-no-survival	down-no-survival
CEACAM7		up-no-survival	down-no-survival	up-no-survival	down-no-survival	down-no-survival	down-no-survival		up-no-survival	up-no-survival		down-no-survival	up-no-survival
CD79B	down-no-survival		down-no-survival				Up-no-survival				down-no-survival	down-no-survival	down-no-survival
SCN4A		down-no-survival	down-no-survival	up-regulated-saver	down-no-survival	down-no-survival	up-regulated-saver	down-no-survival	up-no-survival
ST7L
TKTL1		down-no-survival		up-no-survival						up-no-survival	up-no-survival
PAX6	up-no-survival	up-no-survival		up-no-survival	up-no-survival	up-no-survival	oncogene-like	up-no-survival	up-no-survival	up-no-survival			oncogene-like
RPUSD1		up-no-survival	up-no-survival						oncogene-like	up-no-survival			up-no-survival
RHBDF1								up-no-survival				up-no-survival
LUC7L							oncogene-like	up-no-survival
CACNA2D2						down-no-survival	down-no-survival	down-no-survival	suppressor-like	down-no-survival
BAIAP3							down-no-survival			down-no-survival		up-no-survival
TSR3
PIGQ		up-no-survival											up-no-survival
CRAMP1
TEAD3													down-no-survival
SELE	down-no-survival	down-no-survival		down-no-survival	up-no-survival		suppressor-like	down-no-survival	down-no-survival	down-no-survival		down-no-survival	down-no-survival
DNAJC11							down-no-survival	suppressor-like
FMO3				down-no-survival				down-no-survival	down-no-survival
MYLIP
NOX1		up-no-survival							up-no-survival		up-regulated-saver
E2F2	up-no-survival	up-no-survival		oncogene-like			oncogene-like	up-no-survival	up-no-survival	up-no-survival			up-no-survival
PSMB1
SYN1		up-no-survival					oncogene-like	up-no-survival				up-no-survival
JARID2										up-no-survival
CDKL5									down-no-survival	down-no-survival			down-no-survival
CAMK1G					up-no-survival	up-no-survival	down-no-survival	down-no-survival				up-no-survival	down-no-survival
CDK11A
NADK
TFAP2B			down-no-survival		down-no-survival	down-no-survival	down-no-survival	down-regulated-saver		up-no-survival		down-no-survival	up-no-survival
TFAP2D							up-no-survival		up-no-survival	up-no-survival	up-no-survival	down-no-survival
DLEC1		suppressor-like			up-no-survival			up-no-survival	down-no-survival
CYTH3												down-no-survival
ADAM22				up-no-survival				down-no-survival				down-regulated-saver	down-no-survival
SYPL1													down-no-survival
CYB561	up-no-survival	up-no-survival											up-no-survival
SPAG9													down-no-survival
CELSR3	up-no-survival	up-regulated-saver	up-no-survival	oncogene-like	up-no-survival	up-no-survival	oncogene-like	up-no-survival	up-no-survival	up-no-survival	up-no-survival		up-no-survival
AASS		down-no-survival											down-no-survival
PLEKHG6					down-no-survival	down-no-survival		up-no-survival	up-no-survival	up-no-survival			up-no-survival
SS18L2													up-no-survival
MPND													up-no-survival
MGST1									up-no-survival				oncogene-like
CRY1
PGLYRP1				down-no-survival	up-no-survival		up-no-survival		down-no-survival	down-no-survival	down-no-survival
NFIX	down-no-survival				down-no-survival	down-no-survival			down-no-survival	down-no-survival			down-no-survival
ST3GAL1								down-no-survival
MMP25		up-no-survival	down-no-survival				up-no-survival	up-no-survival		down-no-survival			up-no-survival
IL32							up-no-survival	up-no-survival					up-regulated-saver
PKD1	down-no-survival												down-no-survival
MAPK8IP2	up-no-survival	up-no-survival		up-no-survival	up-no-survival				up-no-survival	up-no-survival	up-no-survival
MED24
RHOBTB2										down-no-survival
HEATR5B
SEC62
CSDE1
UBE3C
REV3L	down-regulated-saver
TENM1		down-no-survival	down-no-survival		up-no-survival		up-no-survival	up-no-survival	up-no-survival			up-no-survival
PAX7		oncogene-like	up-no-survival				up-no-survival		up-no-survival	up-no-survival	up-no-survival
MASP2		down-no-survival								down-no-survival			down-no-survival
IYD	up-no-survival	oncogene-like		down-no-survival	down-no-survival		suppressor-like	down-no-survival	up-no-survival	down-no-survival		down-no-survival	up-no-survival
FAM76A
TRAF3IP3			down-no-survival		up-no-survival		up-no-survival
POMT2
VTA1
MLXIPL		down-no-survival	up-no-survival			down-no-survival						up-no-survival
BAZ1B
RANBP9					down-no-survival
ETV7	up-regulated-saver	up-regulated-saver					up-no-survival	up-no-survival					up-no-survival
SPRTN
EEF1AKNMT
DYRK4
ZNF207
UQCRC1							down-no-survival						up-no-survival
STARD3NL
CD9										up-regulated-saver
HHATL		down-no-survival	down-no-survival		down-no-survival	down-no-survival	up-no-survival	up-no-survival		down-no-survival		up-no-survival
NCAPD2	up-no-survival			up-no-survival					oncogene-like	up-no-survival			up-no-survival
IFFO1	down-no-survival						oncogene-like	up-no-survival		down-no-survival			down-no-survival
GIPR				up-no-survival				up-no-survival				up-no-survival
PHF7
SEMA3G	down-no-survival	down-no-survival	down-regulated-saver	up-no-survival		down-no-survival	suppressor-like	down-no-survival	down-no-survival	down-no-survival			down-no-survival
NISCH
STAB1			down-no-survival	down-no-survival			up-no-survival
FUZ						down-no-survival
SLC6A13					up-no-survival		up-regulated-saver		down-no-survival	down-no-survival			down-no-survival
IDS													down-no-survival
PRSS3					down-no-survival		down-no-survival	down-no-survival	up-no-survival	up-no-survival		up-no-survival	oncogene-like
ZNF200
CD4			down-no-survival	suppressor-like			up-no-survival	up-no-survival		down-no-survival
LRRC23								up-no-survival
BTK			down-no-survival				up-no-survival	up-no-survival	suppressor-like	down-no-survival
HFE
SCMH1
FYN	down-no-survival									down-no-survival		up-no-survival	down-no-survival
HIVEP2
FMO1			up-no-survival	up-no-survival		down-no-survival			up-no-survival	up-no-survival	up-no-survival	down-no-survival	down-no-survival
ELOA
LYPLA2													up-no-survival
CLCN6		down-no-survival											down-no-survival
MRC2												up-no-survival	down-no-survival
NME1-NME2
SLC6A7				up-no-survival	up-no-survival	up-no-survival	oncogene-like	up-no-survival			up-no-survival
TSPAN9					up-regulated-saver
BTBD7
APBA3
MKS1
ABHD5			down-no-survival										oncogene-like
ANOS1			up-no-survival				up-no-survival		suppressor-like	down-no-survival	up-no-survival		up-no-survival
AKAP8L
MBTD1
UTP18
RNF216
TTC19
PTBP1
DPF1	oncogene-like	up-no-survival	up-no-survival	oncogene-like	up-no-survival	up-no-survival	oncogene-like		up-no-survival	up-no-survival	up-no-survival		up-no-survival
SYT7	up-no-survival	up-no-survival	up-no-survival		up-no-survival		down-regulated-saver	down-no-survival	up-no-survival	up-no-survival			up-no-survival
LARS2							suppressor-like
PIK3C2A
PLAUR		up-no-survival			up-no-survival		oncogene-like	up-no-survival				up-no-survival	up-no-survival
ANLN	up-no-survival	up-no-survival	up-no-survival	up-no-survival		up-no-survival	oncogene-like	oncogene-like	oncogene-like	up-no-survival	up-no-survival		up-no-survival
WIZ
RABGAP1
DCN	down-no-survival	down-no-survival	down-no-survival	down-no-survival			down-no-survival	down-no-survival	down-no-survival	down-no-survival	down-no-survival	down-no-survival	down-no-survival
QPCTL													up-no-survival
PPP5C
CEP68	down-no-survival	down-no-survival											down-no-survival
MAP4K3
ZBTB32		up-no-survival		up-no-survival	up-no-survival	up-regulated-saver	oncogene-like
TYROBP						up-no-survival	up-no-survival	up-no-survival	down-no-survival	down-no-survival
TMEM159										up-no-survival			down-no-survival
GABRA3	up-no-survival	up-no-survival		up-no-survival					up-no-survival	up-no-survival	up-no-survival		up-no-survival
BRCA1	Up-no-survival	Up-no-survival	Up-no-survival					oncogene-like	Up-no-survival	Up-no-survival	Up-no-survival		Up-no-survival
ERCC1
CD22		up-no-survival	down-no-survival				up-no-survival	up-no-survival		down-no-survival	down-no-survival		down-no-survival
SEMA3B				up-no-survival			down-no-survival		down-no-survival	down-no-survival
MBTPS2
PRICKLE3										up-no-survival
LTF			down-no-survival		down-no-survival	down-no-survival					down-no-survival	down-no-survival	up-no-survival
EXTL3
NR1H4			down-no-survival					up-no-survival		down-no-survival
ELOVL5
ALOX5							up-no-survival	up-no-survival	down-no-survival	down-no-survival		up-no-survival
KDM5D
CALCOCO1	suppressor-like	down-no-survival							down-no-survival	down-no-survival			down-no-survival
UBR7
MAP4K5
EHD3				down-no-survival	down-no-survival		suppressor-like	down-no-survival			down-no-survival
PSMC4		up-no-survival								up-no-survival			up-no-survival
MAN2B2
SLC7A14		down-no-survival	down-no-survival	up-no-survival	down-no-survival	down-no-survival	down-regulated-saver	down-regulated-saver		up-no-survival	down-no-survival	down-no-survival
CLDN11		down-no-survival	down-no-survival		down-no-survival	down-no-survival	down-regulated-saver	down-no-survival	down-no-survival				down-no-survival
SLC25A39	up-no-survival	up-no-survival							up-no-survival	up-no-survival			up-no-survival
MVP								up-no-survival				up-no-survival
NUB1
PGM3
RWDD2A
CLK1							up-no-survival
POLR3B							down-no-survival
ANGEL1
RNF14
DNASE1L1
DDX11	up-regulated-saver		up-no-survival	up-no-survival	up-no-survival		oncogene-like	up-no-survival	up-no-survival	up-no-survival	up-no-survival		up-no-survival
HEBP1											down-no-survival		down-no-survival
GPRC5A		up-no-survival		down-no-survival	down-no-survival		down-regulated-saver		down-no-survival	down-no-survival	up-no-survival		up-no-survival
MAMLD1												up-no-survival	down-no-survival
CD6	down-no-survival	up-regulated-saver					up-no-survival	up-no-survival
TACC3	up-no-survival	up-no-survival	up-no-survival	up-no-survival		up-no-survival	oncogene-like	oncogene-like	oncogene-like	up-no-survival			up-no-survival
UFL1					down-no-survival
POLA2	up-no-survival	up-no-survival	up-no-survival	up-no-survival	up-no-survival					up-no-survival			up-no-survival
ZC3H3		up-no-survival		up-no-survival
CAPN1					down-no-survival
ACP3					down-no-survival	down-no-survival	down-no-survival	down-no-survival			down-no-survival		up-no-survival
MDH1
SLC30A9
MTMR11				up-no-survival			up-no-survival		up-no-survival			up-no-survival	down-no-survival
COX15
CCDC88C								down-no-survival
YAF2
ZMYND11	down-no-survival
WAS			down-no-survival				oncogene-like	Up-no-survival		down-no-survival
DPEP1	up-no-survival	up-regulated-saver	up-no-survival	up-no-survival	up-no-survival	up-no-survival	suppressor-like	down-no-survival	up-no-survival				up-no-survival
BID	up-no-survival		up-no-survival		up-no-survival		oncogene-like			up-no-survival		up-no-survival	up-no-survival
MATR3							oncogene-like
NPC1L1			oncogene-like						up-no-survival	up-no-survival	down-no-survival
XYLT2										up-no-survival
RGPD5
STMN4			down-no-survival	up-no-survival						up-no-survival	down-no-survival
NUDCD3
ISL1					down-no-survival				up-no-survival	up-no-survival
CHDH	up-no-survival					down-no-survival	suppressor-like			down-no-survival
IL20RA		down-no-survival	up-no-survival				down-regulated-saver	up-no-survival	down-regulated-saver			down-regulated-saver
CLCA1		down-no-survival	suppressor-like								down-no-survival	up-no-survival
CLCA4	down-no-survival	down-no-survival	down-no-survival		down-no-survival	down-no-survival				up-no-survival	down-no-survival		up-no-survival
GLT8D1
ATP2C1
IGF1		down-no-survival	down-no-survival	down-no-survival
SLC38A5	up-no-survival	up-no-survival	up-no-survival		up-no-survival	up-no-survival	oncogene-like
RALBP1							suppressor-like
RUFY3
CNTN1	down-no-survival		down-no-survival		up-no-survival		down-no-survival	down-no-survival		up-no-survival	down-no-survival	down-no-survival
SLC11A1		up-no-survival	up-no-survival		up-no-survival	up-no-survival	oncogene-like	up-no-survival	down-no-survival	down-no-survival	up-no-survival		up-no-survival
WWTR1	down-no-survival		down-no-survival						down-no-survival				down-no-survival
AGPS
CXorf56
ATP1A2	down-no-survival	down-no-survival	down-no-survival	up-no-survival	down-no-survival	down-no-survival		down-no-survival	down-no-survival	down-no-survival	down-no-survival
TTC27
ZNF582			down-no-survival		down-no-survival	suppressor-like		down-no-survival		down-no-survival	down-no-survival		suppressor-like
VSIG2		down-no-survival	suppressor-like		down-no-survival	down-no-survival		down-no-survival	down-no-survival	down-no-survival	down-no-survival		down-no-survival
PHLDB1		down-no-survival				up-no-survival
MARCO		down-no-survival		down-no-survival			up-no-survival	up-no-survival	down-no-survival	down-no-survival		up-no-survival
CYP24A1			up-no-survival				down-no-survival		up-no-survival	up-no-survival	up-no-survival	up-no-survival
PRDM11	down-no-survival	down-no-survival							down-no-survival				suppressor-like
SYT13	up-no-survival	up-no-survival							oncogene-like	up-no-survival	up-no-survival		up-no-survival
SNAI2				up-no-survival	up-no-survival	up-no-survival		down-no-survival		up-no-survival			down-no-survival
CD74							Up-no-survival			down-no-survival
HGF	down-no-survival	down-no-survival		down-no-survival				down-no-survival		down-no-survival			down-no-survival
ZRANB1	down-no-survival												down-no-survival
NCDN
ADGRA2	down-no-survival	down-no-survival					up-no-survival	down-no-survival		down-no-survival			down-no-survival
ZFP64										up-no-survival
MNAT1
SAMD4A	down-no-survival	down-no-survival	down-no-survival							down-no-survival		up-no-survival	down-no-survival
RUNX3					up-no-survival		up-no-survival	up-no-survival				down-no-survival	up-no-survival
MRE11
PLEKHB1			up-no-survival		down-no-survival	down-no-survival	down-regulated-saver			down-no-survival			up-no-survival
SERPINB1					down-no-survival	down-regulated-saver
CYP3A43	up-no-survival	down-no-survival		suppressor-like			up-no-survival				up-no-survival
SLC7A9	up-regulated-saver		up-no-survival				suppressor-like	down-no-survival	up-no-survival	up-no-survival	down-no-survival
SPAST										up-no-survival
NRXN3				up-no-survival		down-no-survival	up-no-survival	up-no-survival
OSBPL5	down-no-survival												down-no-survival
AQR
CPS1		down-no-survival	up-no-survival	suppressor-like					up-no-survival	up-no-survival
C8B				down-no-survival					down-no-survival	down-no-survival		up-no-survival
FHL1	down-regulated-saver	down-no-survival	down-no-survival	down-no-survival	down-no-survival	down-no-survival	up-no-survival	up-no-survival	down-no-survival	down-no-survival	down-no-survival	down-no-survival	down-no-survival
RTF2
GABRA1		up-no-survival	down-no-survival				up-no-survival			up-no-survival	down-no-survival	up-no-survival
NLRP2	up-no-survival	up-no-survival					down-no-survival		up-regulated-saver	up-no-survival			up-no-survival
SLC45A4				up-no-survival				down-no-survival
RNF10
ZNF839
ZDHHC6
GRAMD1B							down-no-survival	down-no-survival	up-no-survival				down-no-survival
RNH1
NDUFS1					down-no-survival	down-no-survival	suppressor-like
RB1CC1
ERP44
ALAS1				down-no-survival									up-no-survival
BIRC3							up-no-survival	oncogene-like		down-no-survival
AKAP11													down-no-survival
GLRX2
SNAPC1					up-no-survival					up-no-survival
DERA
STRAP										up-no-survival
ABCC2			up-no-survival		up-no-survival	up-no-survival			oncogene-like	up-no-survival
DEF6							oncogene-like	up-no-survival					up-no-survival
PLEKHO1	down-no-survival		down-no-survival		up-no-survival		oncogene-like
GCLM	up-no-survival								up-no-survival	up-no-survival
UBR2
EHD2	down-no-survival	down-no-survival	down-no-survival			up-no-survival	up-no-survival	up-no-survival	down-no-survival	down-no-survival		up-no-survival	down-no-survival
DEPDC1	up-no-survival	up-no-survival		up-no-survival		up-no-survival	oncogene-like	up-no-survival	up-no-survival	up-no-survival	up-no-survival		up-no-survival
CCDC28A
RRAGD	down-no-survival	down-no-survival			down-no-survival	down-no-survival
HSF2
PHF20
HSD17B6	down-no-survival	up-no-survival	down-no-survival	down-no-survival	up-no-survival	up-no-survival		down-no-survival	suppressor-like	down-no-survival	down-no-survival		down-no-survival
NR1H3							oncogene-like
TYMP	up-no-survival	up-regulated-saver			up-no-survival	up-no-survival	oncogene-like	up-no-survival					up-no-survival
NCAPH2
TOMM34			up-no-survival								up-no-survival
SEC63
KPNA6
VIM		down-no-survival					up-no-survival	oncogene-like	down-no-survival	down-no-survival
RTEL1-TNFRSF6B	up-regulated-saver		up-no-survival	up-no-survival		up-no-survival	oncogene-like	oncogene-like	up-no-survival		up-no-survival
FAS			down-no-survival				Up-no-survival	Up-no-survival
RNASET2							oncogene-like	up-no-survival					up-no-survival
CD44			up-no-survival				oncogene-like	up-no-survival	down-no-survival			up-no-survival	down-no-survival
KCNG1	up-no-survival	up-no-survival	down-no-survival	up-no-survival					up-no-survival	up-no-survival
AGPAT4				oncogene-like					down-no-survival			down-no-survival
SLAMF7			down-no-survival		up-no-survival		up-no-survival	up-no-survival	up-no-survival		down-no-survival		up-no-survival
BTN3A1							up-no-survival
MIPEP						down-no-survival
PRKCH									suppressor-like				down-no-survival
INSRR				up-no-survival			down-regulated-saver	down-no-survival	up-no-survival	up-no-survival
IFNGR1
B4GALT7													up-no-survival
SH2D2A		up-no-survival	up-no-survival		up-no-survival	up-no-survival	oncogene-like	up-no-survival					up-no-survival
VRK2
TNFRSF1B							up-no-survival			down-no-survival
VEZT
POU2F2	down-no-survival		down-no-survival		up-no-survival	up-no-survival	oncogene-like					down-no-survival
BRD9
SNX1
TBPL1
ARNTL2	up-no-survival		up-no-survival				up-no-survival	up-no-survival	oncogene-like	up-no-survival		up-no-survival
BCLAF1
SLC39A9
ANK1						down-no-survival	up-no-survival	up-no-survival	up-no-survival	up-no-survival	up-no-survival		up-no-survival
IBSP	up-no-survival	up-no-survival	oncogene-like	up-no-survival	up-no-survival	up-no-survival	oncogene-like	up-no-survival	up-no-survival	up-no-survival	up-no-survival	up-no-survival	up-no-survival
TFB1M
RABEP1
HMGB3	up-no-survival	up-no-survival				up-no-survival		up-no-survival	up-no-survival	up-no-survival	up-no-survival		up-no-survival
NUP160
BAK1		up-no-survival								up-no-survival			up-no-survival
MUSK	down-no-survival		down-no-survival						down-no-survival	down-no-survival		down-no-survival
IKZF2					down-no-survival	down-no-survival					down-no-survival
GRN								up-no-survival					up-no-survival
FAM13B	down-no-survival		down-no-survival							down-no-survival			down-no-survival
ARHGAP31		down-no-survival							down-no-survival	down-no-survival			down-no-survival
CENPQ										up-no-survival
SARS1
RANBP3
ARID4A										down-no-survival			down-no-survival
EIPR1										up-no-survival			up-no-survival
PNPLA6									down-no-survival	down-no-survival
IFT88
ALG1
ZCCHC8
ABCF2
CHPF2													up-no-survival
LRRC7	suppressor-like		down-no-survival				up-no-survival			up-no-survival		down-no-survival	down-no-survival
FUT8		up-no-survival						up-no-survival	up-no-survival
UBA6										up-no-survival
GAB2									suppressor-like	down-no-survival			down-no-survival
ATP6V0A1
PIAS1
SLC4A7
APBA2	up-no-survival	up-no-survival			up-no-survival	up-no-survival	oncogene-like	up-no-survival	up-no-survival	up-no-survival			up-no-survival
MAP2K3				down-no-survival
EFCAB1		down-no-survival	down-no-survival					up-no-survival	down-no-survival	down-no-survival
TMSB10		up-no-survival		up-no-survival	up-no-survival	up-no-survival	oncogene-like	up-no-survival				up-no-survival	up-no-survival
ASTE1
RNF19A
PEX3
GABARAPL2
MYOC	down-no-survival	down-no-survival	down-no-survival		down-no-survival	suppressor-like		down-no-survival	down-no-survival	down-no-survival	down-no-survival	down-no-survival	down-no-survival
SH3YL1					down-no-survival			down-no-survival					up-no-survival
FAM136A									up-no-survival	up-no-survival			up-no-survival
VCL	down-no-survival		down-no-survival										down-no-survival
DEPDC1B	up-no-survival	up-no-survival	up-no-survival	up-no-survival	up-no-survival	up-no-survival			oncogene-like	up-no-survival	up-no-survival	up-no-survival	up-no-survival
DAPK2	down-no-survival	down-no-survival		up-no-survival					suppressor-like	down-no-survival		up-no-survival	up-no-survival
NSMAF
ADSS2
STAP1		up-regulated-saver	down-no-survival					down-no-survival			down-no-survival	down-no-survival
TIMP2	down-no-survival									down-no-survival			down-no-survival
RFC1
TBC1D23
CUL3					down-no-survival
MYOM2	down-no-survival	down-no-survival		suppressor-like		down-no-survival		down-no-survival	down-no-survival				down-no-survival
OTC	down-no-survival	down-no-survival	down-no-survival	suppressor-like	down-no-survival	down-no-survival		down-regulated-saver	down-no-survival	down-no-survival	down-no-survival	down-no-survival	down-no-survival
CYP46A1	down-no-survival	down-no-survival	down-no-survival					down-no-survival					down-no-survival
ZZZ3
SLC18A1		up-no-survival					up-no-survival
USP2	down-no-survival		down-no-survival		down-no-survival	down-no-survival	suppressor-like	down-no-survival		down-no-survival	down-no-survival		down-no-survival
CASR			down-no-survival				suppressor-like	down-no-survival	up-no-survival		down-no-survival	down-no-survival
TUBG2					up-no-survival
FLT4		down-no-survival					Up-no-survival	down-no-survival	down-no-survival	down-regulated-saver			down-no-survival
NSUN2									up-no-survival	up-no-survival
FBXO42
MFAP3
MRI1
METTL1			up-no-survival						oncogene-like	up-no-survival
HOXC8	up-no-survival		oncogene-like	up-no-survival	oncogene-like	up-no-survival			up-no-survival	up-no-survival	up-no-survival		down-no-survival
AGA
PI4K2B
BOD1L1
MAT2B
TLL1		down-no-survival	down-no-survival			up-no-survival	up-regulated-saver		down-no-survival	down-no-survival			down-no-survival
EDC4
TRIO						up-no-survival
VCAN		up-no-survival	up-no-survival	up-no-survival	up-no-survival	up-no-survival	up-no-survival	up-no-survival	up-no-survival		up-no-survival	up-no-survival
CLEC16A
MSR1		up-no-survival			up-no-survival	up-no-survival	up-no-survival	up-no-survival	down-no-survival	down-regulated-saver	up-no-survival
CDH1							suppressor-like	down-no-survival	Up-no-survival	Up-no-survival			Up-no-survival
MTREX
DNAH5			up-no-survival			up-no-survival				down-no-survival	up-no-survival
ZFYVE16
RIPOR1									down-no-survival	down-regulated-saver
C6		down-no-survival	down-no-survival	down-no-survival	down-no-survival	down-no-survival	up-regulated-saver	up-no-survival	down-no-survival	down-regulated-saver		down-regulated-saver	down-no-survival
RAI14					up-no-survival	up-regulated-saver					up-no-survival		down-no-survival
SOX30							down-no-survival	down-no-survival	up-no-survival	up-no-survival
PNKP													up-no-survival
BEST2	oncogene-like		down-no-survival		up-no-survival		oncogene-like			up-no-survival
PHLPP2			down-no-survival								down-no-survival		down-no-survival
SPDL1		up-no-survival	up-no-survival	up-no-survival					up-no-survival	up-no-survival	up-no-survival		up-no-survival
STAU2					down-no-survival
SLC66A1	up-no-survival												up-no-survival
CTNS
RTN4R	up-no-survival	up-no-survival	up-no-survival		up-no-survival	up-no-survival	oncogene-like	up-no-survival		up-no-survival		up-no-survival
PHF23
CDH10			down-no-survival	Up-no-survival			down-no-survival	down-regulated-saver	down-no-survival	down-regulated-saver
INPP4A
RAB27B					down-no-survival			up-no-survival				up-no-survival
PSMA4
MYO16		down-no-survival		down-no-survival				down-no-survival				down-no-survival
LSG1										up-no-survival
PARP3
TNC					Up-no-survival	Up-no-survival		Up-no-survival	Up-no-survival	Up-no-survival		Up-no-survival
THAP3
RIPOR3				down-no-survival	up-no-survival	up-regulated-saver		down-no-survival					down-no-survival
TDP1										up-regulated-saver			up-no-survival
AIFM2		down-no-survival											up-no-survival
C2orf83		down-no-survival	up-no-survival				up-no-survival				up-no-survival
SPATA7
MED17
RETSAT		down-no-survival	down-no-survival								down-no-survival
CAPG	up-no-survival	up-no-survival		up-no-survival				up-no-survival
AP2S1		up-no-survival											oncogene-like
USH2A				down-no-survival						up-no-survival	up-no-survival
ZPBP		down-no-survival	up-no-survival	down-no-survival			down-no-survival		down-no-survival			suppressor-like	down-no-survival
TG		up-no-survival	up-no-survival					down-no-survival		up-no-survival		down-no-survival
ADAM28			down-no-survival				up-no-survival	up-no-survival	up-no-survival	up-no-survival			up-regulated-saver
BARX2			down-no-survival		down-no-survival	down-no-survival	up-no-survival		up-no-survival	oncogene-like	down-no-survival		down-no-survival
DCUN1D1										up-no-survival
JADE2					up-no-survival								down-no-survival
ZIC2	up-no-survival	oncogene-like	up-no-survival	up-no-survival	up-no-survival	up-no-survival	oncogene-like		up-no-survival	up-no-survival	up-no-survival	down-no-survival	up-no-survival
LCP2							up-no-survival	up-no-survival		down-no-survival
TRIT1										up-no-survival
ADRB1		down-no-survival	down-no-survival	down-regulated-saver			down-no-survival	down-no-survival	down-no-survival	down-no-survival			up-no-survival
GUCA2B			down-no-survival				up-regulated-saver	up-no-survival		down-no-survival	down-no-survival
CUL7				up-no-survival
CTNNA1					down-no-survival
PHKA2							up-no-survival
CNTLN
EPHA3	down-no-survival		down-no-survival				up-no-survival					down-no-survival	down-no-survival
HSPA5
DSG2					up-no-survival				up-no-survival	up-no-survival			up-no-survival
GEMIN8
OFD1
GPM6B	down-no-survival	down-no-survival	down-no-survival				down-no-survival		down-no-survival	down-no-survival	down-no-survival		up-no-survival
MAGEC2	up-no-survival	up-regulated-saver	up-no-survival	up-no-survival	up-no-survival	up-no-survival	up-no-survival		up-no-survival	up-no-survival	up-no-survival
PREX2	down-no-survival	down-no-survival	down-no-survival				Up-no-survival		down-no-survival	down-no-survival
WDR37
YTHDC2
CTPS2
ATP6V1H							down-no-survival
POLR2B
FAM214A			down-no-survival		down-no-survival						down-no-survival
ARAP2									down-no-survival	down-no-survival		down-no-survival
TPR
CP			down-no-survival	down-no-survival		down-no-survival	up-no-survival		up-no-survival	up-no-survival			up-no-survival
KIAA0556					down-no-survival
DTNBP1
XK				up-no-survival		down-no-survival	down-regulated-saver	down-no-survival
ANO2	down-no-survival			up-no-survival				down-no-survival	down-no-survival	down-no-survival			down-regulated-saver
C12orf4
SCML1			up-no-survival								up-no-survival
WWC3										down-no-survival
ARHGAP6	down-no-survival	down-no-survival			down-no-survival	down-no-survival			down-no-survival	down-no-survival		down-no-survival	down-no-survival
FAM184B						down-no-survival	down-regulated-saver	down-no-survival
MAP4
GOPC
ROS1	Up-no-survival	Up-no-survival		Up-no-survival	Up-no-survival	Up-no-survival	down-regulated-saver	down-no-survival		down-no-survival	Up-no-survival	Up-no-survival	Up-no-survival
USP28										up-no-survival
HDAC9			down-no-survival									up-no-survival
TSPAN17													up-no-survival
NOP16			up-no-survival				oncogene-like			up-no-survival			up-no-survival
CC2D2A	down-no-survival					down-no-survival				down-no-survival
RRM2B
ZNF800
TNFRSF17			suppressor-like		Up-no-survival		Up-no-survival		Up-no-survival	Up-no-survival	down-no-survival		Up-no-survival
SNX29
LMO3	down-no-survival	down-no-survival	down-no-survival			down-no-survival	down-no-survival	down-no-survival		down-no-survival		up-no-survival	down-no-survival
GUCA1A							up-no-survival		up-no-survival	up-no-survival	up-no-survival
RSF1
VPS13D					down-no-survival		suppressor-like
CELF2	down-no-survival	down-no-survival							down-no-survival	down-no-survival			down-no-survival
FAM120A
R3HDM1										up-no-survival
COL9A2			up-no-survival	up-no-survival	up-no-survival		down-regulated-saver	down-no-survival	up-no-survival	up-no-survival			up-no-survival
KITLG	down-no-survival		down-no-survival	up-no-survival			down-no-survival						down-no-survival
ERCC8
ADAMTS6		up-no-survival	oncogene-like	up-no-survival	up-no-survival	up-no-survival		down-no-survival					up-no-survival
H6PD													down-no-survival
VAMP3													down-no-survival
PER3	down-no-survival	down-no-survival	down-no-survival		down-no-survival								down-no-survival
UTS2		up-no-survival		up-no-survival			up-no-survival	up-no-survival	up-no-survival		up-no-survival	up-no-survival
TNFRSF9		up-no-survival		up-no-survival	up-no-survival	up-no-survival	up-no-survival	up-no-survival	up-no-survival				up-no-survival
EPN3	up-no-survival	up-no-survival			down-no-survival		down-regulated-saver	down-no-survival	up-no-survival	up-no-survival	down-no-survival
LTBP1					up-no-survival	up-no-survival		down-no-survival				up-no-survival
RCN1			oncogene-like				oncogene-like	oncogene-like					up-no-survival
ELN	down-no-survival							down-no-survival		down-regulated-saver
RFC2	up-no-survival	up-no-survival					up-no-survival	oncogene-like		up-no-survival			up-no-survival
ARID1B
CLPTM1L
NEDD4L			down-no-survival				suppressor-like	down-no-survival		down-no-survival
FOXP3		up-no-survival	up-no-survival		up-no-survival	up-regulated-saver	oncogene-like		up-no-survival	up-no-survival			up-no-survival
PPP1R3F						down-no-survival
HEXB
PTCD2
NEXMIF	down-no-survival		down-no-survival			down-no-survival	down-no-survival	down-no-survival			down-no-survival	down-no-survival
JKAMP
DKK3		down-no-survival		up-no-survival		up-no-survival			down-no-survival				down-no-survival
ARHGEF5													up-no-survival
NFE2L3	up-no-survival	up-no-survival	up-no-survival	up-no-survival		up-no-survival	oncogene-like	oncogene-like	up-no-survival	up-no-survival	up-no-survival	up-no-survival	up-no-survival
MCUR1
LIMA1			down-no-survival			up-no-survival
LETMD1
SLC4A8		up-no-survival	up-no-survival		up-no-survival	up-no-survival	down-regulated-saver	down-no-survival		down-no-survival
LAMC3	down-no-survival	down-no-survival	down-no-survival					down-no-survival	down-no-survival	down-regulated-saver			up-regulated-saver
PTGER3	down-regulated-saver	down-no-survival	down-no-survival			down-no-survival	down-no-survival	down-no-survival			down-no-survival		down-no-survival
TNIP3		up-no-survival					oncogene-like	up-no-survival		down-no-survival			up-no-survival
MAPK9
COL23A1		down-no-survival	down-no-survival		up-no-survival		up-no-survival	up-no-survival			down-no-survival	down-no-survival
BCAR1
FAM160A2
HERPUD1											down-no-survival
HOMER3	up-no-survival	up-no-survival		up-no-survival	up-no-survival	up-no-survival		up-no-survival	up-no-survival	up-no-survival			up-no-survival
RAD51	up-no-survival	up-no-survival		up-no-survival	up-no-survival	up-no-survival	up-no-survival	up-no-survival	oncogene-like	up-no-survival	up-no-survival		up-no-survival
POLQ	up-no-survival	up-no-survival	up-no-survival	up-no-survival		up-no-survival	oncogene-like	up-no-survival	up-no-survival	up-no-survival	up-no-survival		oncogene-like
PIK3CB
CYBA							oncogene-like	up-no-survival					up-regulated-saver
THOC3		up-no-survival							up-no-survival	up-no-survival			up-no-survival
HEBP2										up-no-survival
MPHOSPH9										up-no-survival
PLEKHA5
PRSS8	up-no-survival	up-no-survival					suppressor-like						up-no-survival
SIKE1
RRP12			up-no-survival
FNIP2			down-no-survival	down-no-survival						down-no-survival
MSMO1									down-no-survival
TTC17
ALX4		down-no-survival		up-no-survival	up-no-survival			down-regulated-saver		up-no-survival
FSTL4		oncogene-like	up-no-survival	up-no-survival	up-no-survival		down-no-survival	down-no-survival	up-no-survival	up-no-survival		up-no-survival	up-no-survival
FOXN3	down-no-survival	down-no-survival	down-no-survival										down-no-survival
METTL24	down-no-survival	down-no-survival	down-no-survival								down-no-survival	down-no-survival
AKR7A2											down-no-survival
MRTO4			up-no-survival							up-no-survival
NNAT		down-no-survival	down-no-survival	up-no-survival		down-no-survival					down-no-survival		down-no-survival
USE1
MCF2L2			down-no-survival	up-no-survival						up-no-survival		up-no-survival
NRIP2		down-no-survival		up-no-survival		down-no-survival		down-no-survival					down-no-survival
LAMA3		down-no-survival		up-no-survival	up-no-survival	up-no-survival		up-no-survival
AP5M1							suppressor-like
ANAPC4
KCNQ1			up-no-survival			down-no-survival	down-no-survival	down-no-survival		down-no-survival
TRAPPC3
THRAP3
PHPT1				up-no-survival									up-no-survival
ENTPD2	up-no-survival			up-no-survival			up-no-survival	up-no-survival	up-no-survival	up-no-survival		up-no-survival	up-no-survival
LY75
ARID4B
OPN3	up-no-survival		down-no-survival			up-no-survival
SDCCAG8
PTPRN	up-no-survival	up-no-survival	down-regulated-saver	up-no-survival	up-no-survival	up-no-survival	oncogene-like	up-no-survival	up-no-survival	up-no-survival	down-no-survival		up-no-survival
HHAT
KIF1B					down-no-survival
FOXC1			up-no-survival			down-no-survival	down-no-survival				up-regulated-saver
TBC1D22A
SYNE2							down-no-survival
PLEKHH1				up-no-survival		down-no-survival				up-no-survival		down-no-survival	up-no-survival
ATP9A
SPO11
CBLN4		down-no-survival					up-no-survival		down-no-survival	down-no-survival		up-no-survival	down-no-survival
CHRDL2					up-no-survival				up-no-survival			up-no-survival	down-no-survival
FAM168A
RELT		up-no-survival	up-no-survival		up-no-survival	up-no-survival	oncogene-like	up-no-survival					up-no-survival
GALC										down-no-survival
NOP58			up-no-survival							up-no-survival
SZRD1
KCNH2	down-no-survival	up-no-survival		up-no-survival				up-no-survival	up-no-survival	up-no-survival			down-no-survival
CUL1
FAM114A2
CYFIP2		up-no-survival					suppressor-like	down-no-survival		down-no-survival	down-no-survival
TAB2
GINM1
EIF2AK2						up-no-survival
USP36
KMT2C
MCOLN3				up-no-survival	up-no-survival		down-no-survival
CCDC85A		down-no-survival	down-no-survival			down-no-survival			down-no-survival	down-no-survival		down-no-survival	down-no-survival
PUM2
ITIH4							oncogene-like
ITIH1				down-no-survival			up-no-survival
HPF1
ZFR
ZNF280C			up-no-survival							up-no-survival	up-no-survival
NPFFR2		up-no-survival		up-no-survival			down-regulated-saver	up-no-survival	up-no-survival	up-no-survival	up-no-survival	up-no-survival
PHF21B		up-no-survival	down-no-survival				down-no-survival	down-no-survival	up-no-survival	up-no-survival
TRAF1					up-no-survival
RC3H2
IL17RB	up-no-survival					down-no-survival					up-no-survival
TRAF3IP2							up-no-survival
GYG2		down-no-survival					down-regulated-saver		up-no-survival	up-no-survival
DCBLD2					up-no-survival	up-no-survival		up-no-survival	oncogene-like
SERPINB3			up-no-survival		down-no-survival				up-no-survival	up-no-survival	down-no-survival	up-no-survival	up-no-survival
SOAT1
PKP2									oncogene-like	up-no-survival		up-no-survival
MSH4			up-no-survival	up-no-survival			oncogene-like				up-no-survival
F7		up-no-survival	up-no-survival						up-no-survival			up-no-survival
GDI2
PRDM1	down-no-survival				down-no-survival		Up-no-survival				down-no-survival	Up-no-survival
ATG5
TMCC3		down-no-survival	down-no-survival						down-no-survival			up-no-survival	down-no-survival
PITHD1
MTA3
USP13						down-no-survival
ATP11B										up-regulated-saver			down-no-survival
LAMC2	up-no-survival	down-no-survival			up-no-survival	up-no-survival	down-no-survival			up-no-survival	up-no-survival	up-no-survival	up-no-survival
CDK14					up-no-survival	up-no-survival							down-no-survival
SEC61A1													up-no-survival
PPP1R12A	down-no-survival												down-no-survival
RASGRF1	up-no-survival	up-no-survival	up-no-survival	up-no-survival	up-no-survival	up-no-survival			down-no-survival	down-no-survival		up-no-survival	up-no-survival
CAMK2B	up-no-survival			down-no-survival	down-no-survival	down-no-survival		up-regulated-saver	up-no-survival	up-no-survival			up-no-survival
CROCC
POLR3E
ATP2B4	down-no-survival	down-no-survival	down-no-survival										down-no-survival
ZC3H11A							oncogene-like
RIOK2
YIPF1
NDC1	up-no-survival								up-no-survival	up-no-survival	up-no-survival
DGKG	down-no-survival				up-no-survival						down-no-survival		down-no-survival
FLYWCH1
UNKL				up-no-survival
TBXAS1							up-no-survival	up-no-survival		down-no-survival
PARP12	up-no-survival	up-regulated-saver			up-no-survival	up-no-survival
ALDH18A1		up-no-survival							up-no-survival	up-no-survival			up-no-survival
TARBP1	up-no-survival		up-no-survival	up-no-survival						up-no-survival	up-no-survival		up-no-survival
GATB
MXD1			down-no-survival		down-no-survival						down-no-survival
CDK17													down-no-survival
DNAJC25				down-no-survival
SLC2A3	down-no-survival						up-no-survival		down-no-survival	down-no-survival			down-no-survival
PSD	down-no-survival		down-no-survival		up-no-survival	up-no-survival			up-no-survival	up-no-survival	down-no-survival	up-no-survival	down-no-survival
CTDP1
YBX3							oncogene-like	oncogene-like
STYK1			down-no-survival		down-no-survival		down-regulated-saver		oncogene-like	up-no-survival		up-no-survival	up-no-survival
WNK1							down-no-survival	down-no-survival
CCAR1
OGFR							up-no-survival
GNA15			up-no-survival				oncogene-like	up-no-survival			down-no-survival		up-regulated-saver
CREB3L3		up-no-survival	down-no-survival		up-no-survival		up-regulated-saver				down-no-survival		up-no-survival
PIGV
PTPRU			up-no-survival					up-no-survival			up-no-survival	up-no-survival
SNRNP40
RIMBP2		down-no-survival					down-no-survival	down-no-survival	up-no-survival	up-no-survival		up-no-survival
COL11A1	up-no-survival	up-no-survival	up-no-survival	oncogene-like	up-no-survival	up-no-survival	oncogene-like	up-no-survival	up-no-survival	up-no-survival	up-no-survival	up-no-survival	up-no-survival
QSER1										up-no-survival
MPC1			down-no-survival	down-no-survival	down-no-survival	down-no-survival	down-no-survival				down-no-survival
ACAA1				down-no-survival	down-no-survival		suppressor-like	suppressor-like			down-no-survival
BCAT1	oncogene-like			up-no-survival		up-no-survival	up-no-survival				up-no-survival	up-no-survival	up-regulated-saver
HDAC7
LZTS1			up-no-survival	up-no-survival			up-no-survival					up-no-survival
PRDM6	down-no-survival		down-no-survival						down-no-survival	down-no-survival
WNT8A		down-no-survival					up-no-survival					up-no-survival
SPAG4	up-regulated-saver	up-no-survival		oncogene-like	up-no-survival		up-no-survival	up-no-survival	up-no-survival	up-no-survival	down-no-survival		up-no-survival
NCKAP1
GUCY1B1					up-no-survival	up-no-survival	up-no-survival					up-no-survival	down-no-survival
SFSWAP
TNK2							up-no-survival			up-no-survival
MON2
CDH3	up-no-survival		up-no-survival		up-no-survival	up-no-survival	down-no-survival	down-regulated-saver	up-no-survival	up-no-survival	up-no-survival	up-no-survival
ARSF	down-no-survival				down-no-survival	down-no-survival		down-no-survival	down-no-survival		down-no-survival	up-no-survival	up-no-survival
GPBP1
DGAT2		down-no-survival	up-no-survival		down-no-survival								oncogene-like
ZNF112
CS
LTK			down-no-survival	down-no-survival		down-no-survival				down-no-survival		up-no-survival	up-no-survival
ELMO2
WAPL
VMP1							oncogene-like	up-no-survival	up-no-survival
APPBP2
POLD1	Up-no-survival		Up-no-survival	Up-no-survival						Up-no-survival			Up-no-survival
SEZ6		up-no-survival	down-no-survival	up-no-survival
EIF4B													down-no-survival
SLC6A16			down-no-survival							down-no-survival		down-no-survival
BICRA
SPHK2							down-regulated-saver	suppressor-like
CA11											down-no-survival	up-no-survival	down-no-survival
ISOC2													up-no-survival
U2AF2
EPN1
MED29
AHRR				up-no-survival			oncogene-like		up-regulated-saver	up-no-survival
GSC2		up-no-survival			up-no-survival					up-no-survival
ZNF275					up-no-survival
MTMR1										up-no-survival
GPC1										up-no-survival
ADCK1
HAGH
RNF4
CASP8
LIMCH1		down-regulated-saver			down-no-survival	down-no-survival		down-no-survival	suppressor-like	down-no-survival
INTS13			up-no-survival						up-no-survival	up-no-survival
TM7SF3
DLX3	up-no-survival	up-no-survival	up-no-survival	up-no-survival			down-no-survival	down-no-survival	up-no-survival	up-no-survival			up-no-survival
SPA17					down-no-survival					down-no-survival
TSPAN32							up-no-survival		down-no-survival	down-no-survival			down-no-survival
CCN5	down-no-survival	down-no-survival	down-no-survival	down-no-survival			oncogene-like	up-no-survival	down-no-survival	down-no-survival	down-regulated-saver		down-no-survival
DMRT3	up-no-survival	down-no-survival	up-no-survival				oncogene-like		up-no-survival	up-no-survival
ST3GAL6				down-no-survival				down-no-survival		down-no-survival
ATP2C2		oncogene-like					down-regulated-saver	down-no-survival		down-no-survival		down-no-survival	up-regulated-saver
NGFR		down-no-survival	down-regulated-saver	down-no-survival			up-no-survival			up-no-survival		up-no-survival	down-no-survival
CDON	down-no-survival		down-no-survival			down-no-survival	up-no-survival					down-no-survival	down-no-survival
TAF2
HIPK2
TNPO3
BORCS8-MEF2B							oncogene-like	up-no-survival	up-no-survival
RFXANK				oncogene-like									up-no-survival
TMEM161A			up-no-survival
LPAR2	up-no-survival	up-regulated-saver							up-no-survival	up-no-survival			up-no-survival
CTSA													up-no-survival
SUGP2
SLC12A2			up-no-survival			down-no-survival		down-no-survival				up-no-survival
SNX24			down-no-survival		down-no-survival						down-no-survival
EYA2			down-no-survival	down-no-survival	down-no-survival	down-no-survival	down-no-survival		up-no-survival	up-no-survival			up-no-survival
CNN2			up-no-survival
ABCA7						down-no-survival							up-no-survival
SNCAIP		down-no-survival	up-no-survival	up-no-survival				down-no-survival					down-no-survival
DDX20
BTBD1
FAR2									down-no-survival	down-no-survival	up-no-survival
BCAS1		up-no-survival	down-no-survival	up-no-survival	down-no-survival	down-no-survival	down-regulated-saver	suppressor-like	up-no-survival		down-no-survival
POU1F1									down-no-survival	down-no-survival
CHI3L2			down-no-survival			down-no-survival	oncogene-like	up-no-survival	down-no-survival	down-no-survival			up-no-survival
SBNO2							oncogene-like
PMS1
HMG20B													up-no-survival
CALCRL		down-no-survival						down-no-survival	down-no-survival	down-no-survival			down-no-survival
TAF11
ANKS1A									suppressor-like	down-no-survival
AP3D1
ZNF76
SLC9A3R2								down-no-survival		down-no-survival
NTHL1		Up-no-survival	Up-no-survival
UHRF1BP1
GNAI3
IPO5			up-no-survival
OAT	down-no-survival					down-no-survival	down-no-survival	down-no-survival	up-regulated-saver		down-no-survival
WDR3										up-no-survival
PKN2
WDR18													up-no-survival
TRAM2					up-no-survival	up-no-survival
NTN1	down-no-survival		down-no-survival					down-no-survival		up-no-survival	down-no-survival	down-regulated-saver
GLP2R	down-no-survival	down-no-survival	down-no-survival	down-no-survival					down-no-survival	down-no-survival	down-no-survival	down-no-survival	down-no-survival
MCM10	up-no-survival	up-no-survival	up-no-survival	up-no-survival		up-no-survival	up-no-survival	up-no-survival	up-no-survival	up-no-survival	up-no-survival		up-no-survival
DGKA							up-no-survival	up-no-survival		up-no-survival	down-no-survival
ERBB3					down-no-survival	down-no-survival						Up-no-survival	Up-no-survival
ROPN1	up-no-survival		down-no-survival					up-no-survival		up-no-survival	up-no-survival	down-no-survival	up-no-survival
ANKRD44	down-no-survival		down-no-survival							down-no-survival			down-no-survival
KARS1
ADAT1
PDIA5					up-no-survival	up-no-survival	up-no-survival
TBC1D22B
NDUFB4										up-no-survival
SPEN
MYLK	down-regulated-saver	down-no-survival	down-no-survival		up-no-survival			down-no-survival	down-no-survival	down-no-survival	down-no-survival		down-no-survival
ZC3H15
MAP2K4
PACC1	up-no-survival	up-no-survival	up-no-survival	up-no-survival		up-no-survival				up-no-survival			up-no-survival
SNAP91			down-no-survival	up-no-survival				up-no-survival		up-no-survival
SLK					down-no-survival								down-no-survival
CYB5R4
COL17A1		down-no-survival	down-no-survival			up-no-survival	up-no-survival	up-no-survival	up-no-survival	up-no-survival			up-no-survival
GSTO2							down-no-survival
SEC61A2									up-no-survival	up-no-survival	up-no-survival
PRKCQ							down-no-survival		down-no-survival	down-no-survival		down-no-survival
TLE2					down-no-survival	down-no-survival				down-no-survival
ASB1	down-no-survival	down-no-survival											down-no-survival
FAM107B			down-no-survival		down-no-survival	down-no-survival				down-no-survival
ME1	down-no-survival	down-no-survival	up-no-survival							up-no-survival	down-no-survival
TBC1D1								suppressor-like					down-no-survival
CDK13
MTHFD2		up-no-survival	up-no-survival		up-no-survival		oncogene-like		up-no-survival	up-no-survival			up-no-survival
SLC9A7	up-no-survival		up-no-survival		up-no-survival				up-no-survival	up-no-survival
FOXJ2													down-no-survival
YBX1
PDE4A										down-regulated-saver
PPP2R5A
CTNNA2		Up-no-survival		Up-no-survival					Up-no-survival	Up-no-survival			Up-no-survival
ELAVL1
TIE1		down-no-survival						down-no-survival	down-no-survival	down-no-survival			down-no-survival
DIP2B										up-no-survival
SMARCD1
KDM4A
NFYC
ZMYND12						down-no-survival	suppressor-like			down-no-survival
SLC9A3			suppressor-like	up-no-survival		down-regulated-saver	down-no-survival	down-no-survival	up-no-survival	up-no-survival
NGEF									oncogene-like	up-no-survival		up-no-survival
ASPM	up-no-survival	up-no-survival	up-no-survival	up-no-survival		up-no-survival	oncogene-like	oncogene-like	oncogene-like	up-no-survival	up-no-survival		up-no-survival
CD84							up-no-survival	up-no-survival
ELOVL1
SPI1							oncogene-like	up-no-survival	down-no-survival	down-no-survival			up-no-survival
ZNRD1			up-no-survival
MPPED2	down-no-survival	down-no-survival	down-no-survival	up-no-survival		down-no-survival	suppressor-like	down-no-survival		up-no-survival	down-no-survival	down-no-survival
CLDN18	up-no-survival	down-no-survival	up-no-survival	up-no-survival	up-no-survival				down-no-survival	down-no-survival
ZBTB11
ATXN3
GOLGA5
FGFR2			down-no-survival			down-no-survival	down-no-survival	down-no-survival	down-no-survival			down-no-survival
LRRC40
ISOC1						down-no-survival
EML1	down-no-survival		down-no-survival						down-no-survival		down-no-survival		down-no-survival
TRMT11
THUMPD1
MSANTD3					up-no-survival	up-no-survival
KIF26A	down-no-survival	down-no-survival						down-no-survival	down-no-survival	down-no-survival			down-no-survival
ATG2B
ARFGEF1
ACSM2B		down-no-survival	down-no-survival					down-no-survival	down-no-survival	down-no-survival		down-no-survival	down-no-survival
ZFAT								down-no-survival
MTFR1		oncogene-like							up-no-survival	up-no-survival
STAG3							up-no-survival	up-no-survival	up-no-survival
FECH							suppressor-like	suppressor-like
MYO9A	down-no-survival									down-no-survival			down-no-survival
DDX3Y								down-no-survival
PFKP				oncogene-like			up-regulated-saver		oncogene-like	up-no-survival
IDI1							suppressor-like	down-no-survival
SP100
KLF6	down-regulated-saver	down-no-survival		down-no-survival	down-no-survival				down-no-survival	down-no-survival		down-no-survival	down-no-survival
PLPP1		down-no-survival	down-no-survival					down-no-survival					down-no-survival
NEO1			down-no-survival
TRAM1
PHKA1			up-no-survival			down-no-survival			up-no-survival	up-no-survival
TNFRSF1A
CACNB1	up-no-survival		down-no-survival				oncogene-like					up-no-survival
EVI5										down-no-survival
STOML1
PKM				oncogene-like					up-no-survival	up-no-survival			up-no-survival
DHX29
DNTTIP2
METTL22
TP53BP1
TRO										up-no-survival			down-no-survival
RRP15
RHOA
DHX8
PRKCZ	up-no-survival									down-no-survival			up-no-survival
ZFY								down-no-survival
IARS2
SYT1		up-no-survival			up-no-survival		down-no-survival	down-no-survival	up-no-survival	up-no-survival		up-no-survival	down-no-survival
NAV3	down-no-survival			up-no-survival		up-no-survival		up-no-survival		down-no-survival			down-no-survival
IDH3G
ROGDI		up-no-survival											up-no-survival
PDZD4	down-no-survival		down-no-survival			down-no-survival			down-no-survival		down-no-survival		down-no-survival
ATP2B3		Up-no-survival	down-no-survival				down-regulated-saver	down-no-survival			down-regulated-saver
ROCK1	down-no-survival												down-no-survival
CBFB			Up-no-survival
PDK3
HYAL2									down-no-survival	down-no-survival
HDAC4	down-no-survival											down-no-survival	down-no-survival
RASSF1										down-no-survival
FGFR3		Up-no-survival								Up-no-survival		Up-no-survival	Up-no-survival
IFI35		up-regulated-saver			up-no-survival	up-no-survival
HEATR6
COASY													up-no-survival
PLEKHH3
MEF2A	down-regulated-saver												down-no-survival
OTUD5
TFE3
TBC1D25
ACSL4		down-no-survival		up-no-survival			down-no-survival		down-regulated-saver	down-no-survival
INPP5A	down-no-survival				down-no-survival								down-no-survival
GPKOW
GRIPAP1
FTSJ1			up-no-survival
PRR11	up-no-survival	up-no-survival	up-no-survival	up-no-survival	up-no-survival	up-no-survival	oncogene-like	oncogene-like	up-no-survival	up-no-survival	up-no-survival		up-no-survival
REEP1	down-regulated-saver	up-no-survival	down-no-survival						down-no-survival	down-no-survival	down-no-survival		down-no-survival
ATP11A			up-no-survival				up-regulated-saver			down-no-survival	up-no-survival	up-no-survival
POLR1A
LAPTM4A
TTC7A
IP6K2
STON1-GTF2A1L	down-no-survival	down-no-survival	down-regulated-saver				up-no-survival			down-no-survival		down-no-survival	down-no-survival
SRBD1
KIF2A
RASGRP2	down-no-survival		down-no-survival				up-no-survival		down-no-survival	down-no-survival	down-no-survival	down-no-survival	down-no-survival
PSME4										up-no-survival
IFT80
SIRT2
ERLEC1
PPP2R5B
PYGM	down-no-survival	down-no-survival	down-regulated-saver		down-no-survival	down-no-survival		down-no-survival	down-no-survival	down-no-survival	down-no-survival		down-no-survival
PAGE1	up-no-survival	up-no-survival		up-no-survival					up-no-survival	up-no-survival	up-no-survival		up-no-survival
PITX1	down-no-survival	up-no-survival	up-no-survival	up-no-survival	down-no-survival	down-no-survival	oncogene-like	up-no-survival	up-no-survival	up-no-survival	suppressor-like		up-no-survival
TRPC7		oncogene-like	down-no-survival	up-no-survival			down-no-survival		up-no-survival	up-no-survival		up-no-survival
MAST4					down-no-survival						down-no-survival		down-no-survival
ADGRF5		down-regulated-saver						down-no-survival	suppressor-like	down-no-survival			down-no-survival
SDK2				up-no-survival	up-regulated-saver	up-no-survival				up-no-survival		down-no-survival
ADAM7								up-no-survival		up-no-survival
NUP133
NUCKS1
VPS35
DNAJA2
BCL3		Up-no-survival
KCNAB2					up-no-survival				down-no-survival	down-no-survival
ABCC9	down-regulated-saver	down-regulated-saver	down-no-survival	down-no-survival					down-no-survival	down-no-survival			down-no-survival
GAL	up-no-survival	up-no-survival	up-no-survival	up-no-survival	up-no-survival	up-no-survival	down-no-survival		oncogene-like	up-no-survival	up-no-survival		up-no-survival
CLEC2D					up-no-survival		oncogene-like	up-no-survival
FUNDC1
MAOB	down-regulated-saver		down-no-survival			down-no-survival			down-no-survival	down-no-survival	down-no-survival		down-no-survival
RORA	down-no-survival				down-no-survival	down-no-survival			down-no-survival		down-no-survival		down-no-survival
DRD4		up-no-survival		up-no-survival	up-no-survival		up-no-survival	up-no-survival		up-no-survival
TGFBR3	down-no-survival	down-no-survival	down-no-survival	suppressor-like	down-no-survival	down-no-survival	suppressor-like	down-no-survival	down-no-survival	down-no-survival	down-no-survival	down-no-survival	down-no-survival
PLA2G10		up-no-survival	down-no-survival			down-no-survival	up-no-survival		up-no-survival	down-no-survival	down-no-survival	up-no-survival	up-no-survival
HES2	up-no-survival	up-no-survival		up-no-survival		up-no-survival				up-no-survival		up-no-survival	up-no-survival
ATP1B3					up-no-survival					up-no-survival
NEDD4													down-no-survival
PIGB
MAPK6										up-no-survival
GNB5						up-no-survival
RAB27A	down-no-survival		down-no-survival		down-no-survival					down-no-survival	down-no-survival	up-no-survival
HDHD5										up-no-survival
UFD1										up-no-survival
LRP6
GUCY2C				oncogene-like	down-no-survival				up-no-survival	up-regulated-saver
SCT		up-no-survival						up-no-survival	up-no-survival	up-no-survival
PHRF1
ELP1
NUCB2					down-no-survival	down-no-survival
PFN2					up-no-survival		down-no-survival		up-no-survival	up-no-survival
PTPN3							suppressor-like						up-no-survival
SPTB		down-no-survival					down-no-survival	down-no-survival	up-no-survival
DAPP1					down-no-survival						down-no-survival		down-no-survival
FGF10	down-regulated-saver		down-no-survival			down-no-survival	down-no-survival	down-no-survival	down-no-survival	down-no-survival		down-no-survival	down-no-survival
SLC44A1					up-no-survival
TMEM260
SMG6													down-no-survival
EXOC5
CLTCL1				Up-no-survival		down-no-survival				Up-no-survival
FGF22	up-no-survival			up-regulated-saver
FSTL3			oncogene-like		Up-no-survival	Up-no-survival	Up-no-survival			down-no-survival		Up-no-survival	down-no-survival
DGCR2
RNF126
MNT
ZXDC
JMJD6
POLB		up-no-survival	up-no-survival						up-no-survival	up-no-survival
ST6GALNAC1			down-no-survival	down-no-survival	down-no-survival	down-no-survival			up-no-survival		down-no-survival		up-no-survival
WIPI1													up-no-survival
FRMPD1		down-no-survival		up-no-survival		down-no-survival			down-no-survival			down-no-survival
GBA2
NDST1									down-no-survival	down-no-survival
ASNS			up-no-survival	up-no-survival	up-no-survival	up-no-survival	up-no-survival	up-no-survival	up-no-survival	up-no-survival
AP3M2					up-no-survival						up-no-survival
CNGB1	up-no-survival		down-no-survival		up-no-survival	up-no-survival		oncogene-like	up-regulated-saver	up-no-survival		up-no-survival
ST6GALNAC2				up-no-survival			suppressor-like		down-no-survival
CHAT		up-no-survival	down-regulated-saver		up-no-survival		oncogene-like	up-no-survival	up-no-survival	up-no-survival		up-no-survival	up-no-survival
PABPC1									up-no-survival	up-no-survival
TESK2			down-no-survival
CFAP20
CSNK2A2
PTPN21	down-regulated-saver	down-no-survival	down-no-survival						down-no-survival	down-no-survival			down-no-survival
EIF2B3
CAMK2A	down-no-survival	up-no-survival	down-no-survival	up-no-survival	down-no-survival	down-no-survival	down-regulated-saver	down-no-survival	down-no-survival	down-no-survival	down-no-survival		down-no-survival
TCOF1			up-no-survival	up-no-survival
CDC42
OSBPL3			oncogene-like	up-no-survival							up-no-survival
EPHA8	up-no-survival	up-no-survival	up-no-survival		up-no-survival	up-no-survival			up-no-survival	up-no-survival			up-no-survival
SLC12A3		up-no-survival					down-no-survival	down-no-survival				down-no-survival	up-no-survival
RAD18	up-no-survival		up-no-survival
ATP2B1			down-no-survival		up-no-survival
TRPM5		up-no-survival		up-no-survival			down-no-survival	down-no-survival	up-no-survival	up-no-survival	up-no-survival	down-no-survival
NCK2
MAP4K4							up-no-survival
MGAT4A			down-no-survival			down-no-survival				down-no-survival
WDR1
SNX13
MS4A12			down-no-survival				oncogene-like					up-no-survival
ARHGAP10	down-no-survival	down-no-survival	down-no-survival	down-no-survival	down-no-survival						down-no-survival		down-no-survival
ING3
VASH1							up-no-survival		down-no-survival	down-no-survival
LMCD1	down-no-survival					down-no-survival			down-no-survival	down-no-survival			down-no-survival
BUD23													up-no-survival
SEL1L
TRIP13	up-no-survival	up-no-survival	up-no-survival	oncogene-like	up-no-survival	up-no-survival	oncogene-like	oncogene-like	up-no-survival	up-regulated-saver	up-no-survival		oncogene-like
ATP6AP1		oncogene-like											up-no-survival
TCF3				up-no-survival						up-no-survival			up-no-survival
TRIB2								down-no-survival
DAZAP1
MBD3
PRLH		up-no-survival							down-no-survival	down-no-survival			up-no-survival
HLTF					up-no-survival				up-no-survival	up-no-survival
FAM50A				oncogene-like				up-no-survival					up-no-survival
FAM3A
CPSF1
MYO3B		up-no-survival	up-no-survival		up-no-survival	up-no-survival	down-no-survival	down-no-survival	up-no-survival	up-no-survival		up-no-survival	up-no-survival
CYBRD1	down-no-survival	down-no-survival	down-no-survival					down-no-survival	down-no-survival	down-no-survival	down-no-survival		down-no-survival
CDH19	down-no-survival		down-no-survival	down-no-survival		down-no-survival	down-no-survival	down-no-survival	down-no-survival	down-no-survival	down-no-survival	down-no-survival	down-no-survival
PDCD2
SLC6A15		up-regulated-saver		up-no-survival				oncogene-like	up-no-survival	up-no-survival	down-no-survival	down-no-survival
RDH11
PRKACA
ADGRL1				up-no-survival
SPP2				down-no-survival					up-no-survival	up-no-survival
ACTN1	down-no-survival				up-no-survival	up-no-survival						up-no-survival	down-no-survival
ZFYVE26
EPN2
PTPN18
LIMS2	down-no-survival	down-no-survival	down-no-survival					down-no-survival	down-no-survival	down-no-survival	down-no-survival		down-no-survival
ASIC4			up-no-survival	up-no-survival	up-no-survival		oncogene-like	up-no-survival
SPEG	down-no-survival		down-regulated-saver		down-no-survival	down-no-survival					down-no-survival		down-no-survival
LNX1					down-no-survival	down-no-survival	suppressor-like	down-no-survival		up-no-survival	down-no-survival
ALDH3A2						down-no-survival					down-no-survival
TFRC	up-no-survival	oncogene-like			up-no-survival					up-no-survival			up-no-survival
SREBF1	up-no-survival	up-no-survival										up-no-survival	up-no-survival
TRPC5		down-no-survival		down-no-survival			down-no-survival	down-no-survival				up-no-survival
AFF4
UBE2D1
MPP5			down-no-survival				suppressor-like
RHOBTB1				up-no-survival						down-no-survival
SMC1A
HSD17B10													oncogene-like
MARK2
HMMR	up-no-survival	up-no-survival	up-no-survival	up-no-survival		up-no-survival	oncogene-like	oncogene-like	up-no-survival	up-no-survival	up-no-survival		up-no-survival
CHFR							oncogene-like	up-no-survival					up-no-survival
TRHDE		down-no-survival	down-no-survival						down-no-survival	down-no-survival		down-no-survival
P4HA2				up-no-survival	up-no-survival	up-no-survival	up-no-survival					up-no-survival
FCGR2B			down-no-survival	down-no-survival			Up-no-survival	Up-no-survival
NFATC3
TRNT1
ACADVL						down-no-survival							up-no-survival
STK10						up-no-survival	up-no-survival			down-no-survival
FBXW11													down-no-survival
ACAP1	down-no-survival						oncogene-like
CRMP1					up-no-survival			up-regulated-saver					down-no-survival
EVC	down-no-survival						suppressor-like						down-no-survival
DERL2
SIDT1			down-no-survival		down-no-survival	down-no-survival							up-no-survival
NDE1					up-no-survival	up-no-survival				up-no-survival
IRAG1	down-no-survival	down-no-survival	down-no-survival					down-no-survival		down-no-survival			down-no-survival
TMEM38A					down-no-survival	down-no-survival					down-no-survival		up-no-survival
AP1M1
PVR			up-no-survival
XRCC1
SCARB1			up-no-survival		up-no-survival		up-no-survival	up-no-survival
CYP2W1		up-regulated-saver	up-no-survival	up-no-survival						up-no-survival	up-no-survival	up-no-survival	up-no-survival
MCM2	up-no-survival	up-no-survival	up-no-survival	up-no-survival	up-no-survival	up-no-survival			up-no-survival	up-no-survival	up-no-survival		up-no-survival
MOV10L1					up-no-survival	up-no-survival	up-no-survival	down-no-survival	up-no-survival	up-no-survival	up-no-survival
PANX2	up-no-survival	up-no-survival	up-no-survival						up-no-survival	up-no-survival
SELENOO
TP63		down-no-survival						down-no-survival		up-no-survival	up-no-survival	up-no-survival	up-no-survival
ALPK1
LLGL2		up-no-survival			down-no-survival		suppressor-like						up-no-survival
PDE8A			down-no-survival
CLCN4			oncogene-like		down-no-survival	down-no-survival				down-no-survival	up-regulated-saver
NLE1			up-no-survival							up-no-survival
SDHA													Up-no-survival
SMARCE1
FNDC8										up-no-survival
GSDMB						up-no-survival	oncogene-like	up-no-survival	up-no-survival	up-no-survival		up-no-survival	up-no-survival
KDM5A
ADAM11			down-regulated-saver	up-no-survival		down-no-survival	oncogene-like	oncogene-like	up-no-survival	up-no-survival			down-no-survival
PPP2R3A			down-no-survival
FERMT2	down-regulated-saver	down-no-survival	down-no-survival	down-no-survival					down-no-survival	down-no-survival			down-no-survival
ABCB11		down-no-survival	down-no-survival		down-no-survival		oncogene-like		oncogene-like		up-no-survival	down-no-survival
DHRS9		down-no-survival	down-no-survival		down-no-survival	down-no-survival	up-no-survival	up-no-survival
CD5L			down-no-survival	down-no-survival			up-no-survival	up-no-survival	down-no-survival	down-no-survival		up-no-survival
PTGS2	down-no-survival	down-no-survival		down-no-survival		up-no-survival	down-no-survival	down-no-survival
IGF2BP2	Up-no-survival			Up-no-survival	Up-no-survival	Up-no-survival		Up-no-survival		Up-no-survival	Up-no-survival	Up-no-survival
MAP3K13										up-no-survival
ST6GAL1							down-no-survival	down-no-survival
TBX21			down-no-survival				up-no-survival			down-no-survival
FRY	down-no-survival					down-no-survival	suppressor-like	down-no-survival	down-no-survival	down-no-survival			down-no-survival
PICALM
NSF
GLI2	down-no-survival						oncogene-like	down-no-survival		up-no-survival			down-no-survival
CLASP1
NOTCH3			up-no-survival	up-no-survival			up-no-survival	down-no-survival		up-no-survival		up-no-survival
CLNS1A										up-no-survival
PPP2R2C		up-no-survival	up-no-survival	oncogene-like			oncogene-like	up-no-survival	up-no-survival	up-no-survival		up-no-survival
TEAD2				up-no-survival	up-no-survival	up-no-survival
EED
CDHR2	up-no-survival	up-no-survival	down-no-survival	down-no-survival	up-no-survival				up-no-survival		down-no-survival		up-no-survival
SNCB	up-no-survival	up-no-survival	down-regulated-saver		up-no-survival		up-no-survival	up-no-survival		up-no-survival			up-no-survival
TSG101
NCBP3
ATP2A3		up-no-survival	down-no-survival			down-no-survival					down-no-survival		up-no-survival
CA12		up-no-survival	down-no-survival	up-no-survival				down-no-survival	up-no-survival	up-no-survival		up-no-survival
MGLL	down-no-survival	down-no-survival	down-no-survival		down-no-survival	down-no-survival				down-no-survival
NTN4		down-no-survival	down-no-survival	down-no-survival	down-no-survival		suppressor-like	down-no-survival	down-no-survival	down-regulated-saver			down-no-survival
BCS1L
NUAK1					up-no-survival	up-no-survival		down-no-survival					down-no-survival
DPP8
SLC24A1
ZNF532
SCARF1		down-no-survival					up-no-survival		suppressor-like	down-regulated-saver			down-no-survival
LMAN1
HACD3			up-no-survival				down-no-survival	down-no-survival
IPCEF1			down-no-survival		down-no-survival	down-no-survival	down-no-survival	down-no-survival	up-no-survival			down-no-survival
ZZEF1			down-no-survival
NOX3
ENO1									up-no-survival	up-no-survival			up-no-survival
SLC12A1		up-no-survival		up-no-survival			down-no-survival	down-no-survival	down-no-survival				up-no-survival
MYDGF							oncogene-like						up-regulated-saver
ANO8					down-no-survival								up-no-survival
TUBE1				down-no-survival
ARHGEF10L					down-no-survival	down-no-survival
TXK										down-no-survival			up-no-survival
WSCD2		down-no-survival	down-no-survival				suppressor-like	down-no-survival		up-no-survival	down-no-survival	down-no-survival	down-no-survival
KCNQ2				up-no-survival			down-regulated-saver		up-no-survival	up-no-survival
TACR2	down-no-survival		down-no-survival										down-no-survival
ACTR6
TIPIN										up-no-survival
SRI			down-no-survival
EIF4G3
NUP37										up-no-survival
SEMA3A	down-no-survival	down-no-survival		up-no-survival					oncogene-like				up-no-survival
GTSE1	up-no-survival	up-no-survival	up-no-survival	up-no-survival	up-no-survival	up-no-survival	oncogene-like	oncogene-like	oncogene-like	up-no-survival	up-no-survival		up-no-survival
SEMA3C					up-no-survival	up-no-survival
TTC38								down-no-survival
ACAT1	down-regulated-saver		down-no-survival	down-no-survival		down-no-survival	suppressor-like
GRAMD4			down-no-survival				up-no-survival						up-no-survival
CELSR1		up-no-survival	up-no-survival
WNT8B			up-no-survival	up-no-survival	up-no-survival		down-no-survival	down-no-survival	up-no-survival	up-regulated-saver	up-no-survival
ZNF638
SLC25A40
TIMM21
ADD2			down-no-survival		up-no-survival		up-no-survival	up-no-survival		up-no-survival
FGF4		up-no-survival	up-regulated-saver	up-no-survival			down-no-survival			up-no-survival		up-no-survival	up-no-survival
RASAL2					down-no-survival
VPS9D1
ZNF37A
MARK3
SLC25A3
FNDC3B					up-no-survival	up-no-survival
FOSL2													down-no-survival
CACNG5		up-no-survival	down-no-survival		oncogene-like			down-no-survival	up-no-survival	up-no-survival			up-no-survival
CACNG4	up-no-survival	up-no-survival	up-no-survival	up-no-survival	up-no-survival			down-no-survival		down-no-survival		up-no-survival
FRYL
TMEM131			down-no-survival
FSCN1	up-no-survival		up-no-survival		up-no-survival	up-no-survival	up-no-survival		oncogene-like	up-no-survival
ACTB
MOCOS	up-no-survival											up-no-survival
PLD1			down-no-survival							up-no-survival	down-no-survival		down-no-survival
ATP12A	up-no-survival				down-no-survival		down-no-survival	down-no-survival		up-no-survival		up-no-survival	up-no-survival
WDR62	up-no-survival	up-no-survival	up-no-survival	up-no-survival			oncogene-like	oncogene-like	up-no-survival	up-no-survival	up-no-survival		up-no-survival
DLG1										up-no-survival
RAB7A
BCAP29
SEC31B							oncogene-like
SART3
ARHGAP15			down-no-survival				up-no-survival			down-no-survival
TUBA3D	up-no-survival	up-no-survival					up-no-survival		up-no-survival	up-no-survival
PAX2	up-no-survival	up-no-survival	up-no-survival		up-no-survival					up-no-survival	up-no-survival
EXOSC7			up-no-survival
KIFAP3
MKRN2
MCM6		up-no-survival		up-no-survival					up-no-survival	up-no-survival
REXO2
RBM7
RBMS2		down-no-survival							down-no-survival	down-no-survival
BAZ2A
PTPN23
MLH1
UNG										up-no-survival
FMO4			down-no-survival				suppressor-like	down-no-survival			down-no-survival
KLHL20													down-no-survival
RGS11						down-no-survival						up-no-survival
SLC46A1			down-no-survival								down-no-survival
PLXNA2			down-no-survival							down-no-survival
SPAG5	up-no-survival	up-no-survival	up-no-survival	up-no-survival	up-no-survival	up-no-survival		down-regulated-saver	oncogene-like	up-no-survival	up-no-survival	down-no-survival	up-no-survival
ANKRD13A
TPD52		oncogene-like						down-no-survival	up-no-survival	up-no-survival			up-no-survival
ACACB	down-no-survival	down-no-survival	down-no-survival	down-no-survival	down-no-survival	down-no-survival		suppressor-like	down-no-survival	down-no-survival	down-no-survival	down-no-survival	down-regulated-saver
TRAF4		up-no-survival							up-no-survival	up-no-survival			up-no-survival
PAG1			down-no-survival		up-no-survival	up-no-survival	up-no-survival			down-no-survival
GPATCH1
ICAM3			down-no-survival				up-no-survival				down-no-survival
NT5C2					down-no-survival
MCAM	down-regulated-saver	down-no-survival		up-no-survival	up-no-survival		up-regulated-saver			down-no-survival		up-no-survival	down-no-survival
GPC4		up-no-survival
MBNL3	down-no-survival				down-no-survival
CAMSAP3					down-no-survival	down-no-survival							up-no-survival
RAP1GAP	up-no-survival						down-no-survival	down-no-survival		down-no-survival		down-no-survival	up-no-survival
XAB2
ARHGEF1							up-no-survival
STXBP2		up-regulated-saver											up-no-survival
MAP2K7
NMRK2	down-no-survival	down-no-survival	down-no-survival		down-no-survival		up-no-survival	up-no-survival	suppressor-like	down-regulated-saver
DGKD							up-no-survival				down-no-survival
CTTNBP2		down-no-survival	up-no-survival			down-no-survival					down-no-survival		down-no-survival
ACTL6B		up-no-survival	down-no-survival	up-regulated-saver			oncogene-like	up-no-survival		up-no-survival
RARB	down-no-survival	down-no-survival				down-no-survival
TOP2B
TM9SF3
NFKB2							oncogene-like
UBE2T	up-no-survival	up-no-survival	up-no-survival	up-no-survival	up-no-survival	up-no-survival		oncogene-like	oncogene-like	up-no-survival	up-no-survival		up-no-survival
PPP1R12B	down-no-survival	down-no-survival	down-no-survival		down-no-survival	down-no-survival		down-no-survival		down-no-survival			down-no-survival
DNAJC10													up-regulated-saver
GTF3C1
IL4R							oncogene-like	up-no-survival
USP33
PAK3		down-no-survival	down-no-survival	up-no-survival					up-no-survival			down-no-survival	down-no-survival
CAPN6						suppressor-like	down-no-survival					down-no-survival	up-no-survival
DCX			down-no-survival	up-no-survival						up-no-survival		down-no-survival
SNRPA										up-no-survival
SPAG6	up-no-survival	up-no-survival	down-no-survival	up-no-survival				up-no-survival	down-no-survival	down-no-survival		up-no-survival
EXOSC5			up-no-survival				up-no-survival		up-no-survival	up-no-survival
DYNC1I2
APBB1IP		suppressor-like	down-no-survival				up-no-survival	up-no-survival		down-no-survival
LRCH4
FAM76B
SIRT6													up-no-survival
TYR			up-no-survival			down-no-survival	up-no-survival	up-no-survival				up-no-survival
POLD3
ACTN2	down-no-survival	up-no-survival		up-no-survival	down-no-survival		oncogene-like		down-no-survival	down-no-survival		down-no-survival
CAPZB
GPR137B
NAALAD2	down-no-survival	down-no-survival	down-no-survival					down-no-survival	down-no-survival	down-no-survival		down-no-survival	down-no-survival
JADE1	down-no-survival	down-no-survival				down-no-survival				down-no-survival
SLC25A43
UBE2A
FGFR1	down-regulated-saver		down-no-survival
FKBP6				up-no-survival			up-no-survival	up-no-survival			up-no-survival
SMC1B	up-no-survival	up-no-survival	up-no-survival	up-no-survival	oncogene-like	up-no-survival	oncogene-like	up-no-survival	up-no-survival	up-no-survival	up-no-survival		up-no-survival
FBLN1		down-no-survival	down-no-survival	up-no-survival			down-regulated-saver	down-no-survival	down-no-survival		down-no-survival	down-no-survival
ITGA8	down-no-survival		down-no-survival					down-no-survival	down-no-survival	down-no-survival	down-no-survival		down-no-survival
CST7							up-no-survival	up-no-survival		down-no-survival
MAP2			down-no-survival	oncogene-like				oncogene-like				up-no-survival
PIAS2
AMPH	down-no-survival		down-no-survival		up-no-survival		down-no-survival	down-no-survival	up-no-survival				down-no-survival
ARAF
MCCC1							down-no-survival
LAMP3		up-no-survival			up-no-survival	up-no-survival	up-no-survival		suppressor-like	down-no-survival	up-no-survival	up-no-survival	up-no-survival
FAP	up-no-survival	up-no-survival	up-no-survival	up-no-survival	up-no-survival	up-no-survival	up-no-survival		up-no-survival	up-no-survival	up-no-survival	up-no-survival	down-no-survival
NEBL			up-no-survival		down-no-survival	down-no-survival	suppressor-like	down-no-survival	down-no-survival	down-no-survival
ACER3
UBE2K
PIK3C3
N4BP2
TIGAR
TULP3
SYNJ2									up-no-survival	up-no-survival
ADCY2	down-no-survival		down-no-survival		down-no-survival		up-no-survival	up-regulated-saver		up-no-survival			down-no-survival
PPP2R5C
RBFOX1			down-no-survival		down-no-survival	down-no-survival	down-regulated-saver		up-no-survival	up-no-survival	up-no-survival	up-no-survival	down-no-survival
GNB1
HOXA9		down-no-survival	up-no-survival	up-no-survival	up-no-survival	up-no-survival			up-no-survival	up-no-survival	up-no-survival
EDN1		down-no-survival					up-regulated-saver		down-no-survival	down-no-survival			suppressor-like
MLLT10
ZCWPW1													suppressor-like
ADCYAP1R1	down-no-survival	down-regulated-saver	down-no-survival				up-no-survival		down-no-survival	down-no-survival	down-no-survival
FGF20		down-no-survival	up-no-survival			down-no-survival	up-no-survival	up-no-survival	up-no-survival		up-no-survival	up-no-survival	up-no-survival
P2RY10		up-no-survival	down-no-survival				up-no-survival				down-no-survival	down-no-survival
ITM2A	down-no-survival	down-no-survival	down-no-survival		down-no-survival	down-no-survival		down-no-survival	down-no-survival	down-no-survival	down-no-survival		down-no-survival
NRDC
VDAC3										up-no-survival
PCM1						down-no-survival
TNRC6C	down-no-survival												down-no-survival
CBFA2T2				up-no-survival
BRINP1		down-no-survival		down-no-survival		down-no-survival			up-no-survival			up-no-survival
ITCH
PKD2L2
TP53INP2	down-no-survival		down-no-survival		down-no-survival						down-no-survival
SDF4
MYH7B		down-no-survival	oncogene-like			down-no-survival	oncogene-like						up-no-survival
BPIFB2	up-no-survival	up-no-survival	up-no-survival	up-no-survival		down-no-survival	oncogene-like		up-no-survival		down-no-survival		up-no-survival
TP73	up-no-survival		up-no-survival	up-no-survival			oncogene-like	up-no-survival		up-no-survival
TOLLIP
UBE2D4
CLUL1				up-no-survival	down-no-survival	down-no-survival	down-no-survival	down-no-survival			down-no-survival	down-no-survival	up-no-survival
RUNX1T1	down-regulated-saver	down-no-survival	down-no-survival					down-no-survival	down-no-survival	down-no-survival		suppressor-like	down-no-survival
CDH17				Up-no-survival				Up-no-survival	Up-no-survival	Up-no-survival
THOC1
FKBP7													down-no-survival
OSBPL6						down-no-survival	down-regulated-saver	down-no-survival	down-no-survival
SLC1A3		down-no-survival		up-no-survival			up-no-survival	up-no-survival
XRCC5
LXN			down-no-survival
SP140		up-no-survival	down-no-survival		up-no-survival		oncogene-like	up-no-survival				down-no-survival	up-no-survival
MKNK1
TNS1	down-no-survival	down-no-survival	down-no-survival		down-no-survival	down-no-survival		down-no-survival	down-no-survival	down-regulated-saver	down-no-survival		down-no-survival
REXO1
SAR1A
CDC14A			down-no-survival					down-no-survival	down-no-survival	down-no-survival
RAPGEF3		down-no-survival					down-no-survival	down-no-survival		down-no-survival
CEACAM1			suppressor-like		down-no-survival	down-no-survival	suppressor-like	down-no-survival	up-no-survival				up-no-survival
SENP1
DUSP13		oncogene-like	up-no-survival	oncogene-like	down-no-survival	down-no-survival		up-no-survival	up-no-survival	up-no-survival		up-no-survival
CIC
LIPE		down-no-survival			down-no-survival	down-no-survival		down-no-survival
FDFT1
PAFAH1B3	up-no-survival	up-no-survival	up-no-survival	oncogene-like				up-no-survival	up-no-survival	up-no-survival		up-no-survival	up-no-survival
OPHN1							suppressor-like	down-no-survival					down-no-survival
AFM				down-no-survival			suppressor-like	down-no-survival
KIF22	up-no-survival	up-no-survival		oncogene-like					up-no-survival	up-no-survival			up-no-survival
SCGN			down-no-survival	up-no-survival		down-no-survival	up-regulated-saver	up-no-survival		down-no-survival
CARMIL1							down-no-survival
PGM1		down-no-survival	down-no-survival	down-no-survival		down-no-survival
DDX1
DNM2
EPB41L2	down-no-survival	down-no-survival							down-no-survival	down-no-survival
RIMS1		up-no-survival	down-no-survival			down-no-survival
MOXD1		up-no-survival					down-no-survival	down-no-survival
STX7
RABL2B
KEAP1
DDX43							up-no-survival	up-no-survival
PTPRH			down-no-survival				oncogene-like	oncogene-like	oncogene-like	up-no-survival			up-no-survival
DCT	down-no-survival	down-no-survival	up-no-survival			down-no-survival							down-no-survival
SLC35C2
CRYBG3	down-regulated-saver	down-no-survival	down-no-survival		down-no-survival			down-no-survival				down-no-survival	down-no-survival
EPHA6	down-regulated-saver		down-regulated-saver				up-no-survival		up-no-survival	up-no-survival	down-regulated-saver	down-no-survival	down-no-survival
SCTR		down-no-survival	down-no-survival				down-no-survival	down-no-survival		down-no-survival			up-no-survival
RFX3
RIF1
RAB21
SLC4A4		down-no-survival	down-no-survival	down-no-survival		down-no-survival		down-no-survival		down-no-survival		down-no-survival
SMARCA2								suppressor-like					down-no-survival
RDH8	up-no-survival			up-no-survival	up-no-survival	up-no-survival	down-regulated-saver	down-no-survival		up-no-survival	up-no-survival
SESN1		down-no-survival				down-no-survival			down-no-survival	down-no-survival			down-no-survival
MID2	down-no-survival												down-no-survival
DNAAF6		up-no-survival					down-no-survival		down-no-survival	down-no-survival		down-no-survival
COL5A3	up-no-survival		up-no-survival	up-no-survival	up-no-survival	up-no-survival	up-no-survival				up-no-survival	up-no-survival
SRCAP
PUM3			up-no-survival
CPB2	up-no-survival		up-no-survival	down-no-survival	up-no-survival		up-no-survival		down-no-survival	down-no-survival	up-no-survival		up-no-survival
CHRNA3			down-no-survival	up-no-survival									up-no-survival
KCNN2	down-no-survival			down-no-survival		down-no-survival		down-no-survival		down-no-survival		up-no-survival	down-no-survival
CNOT4
PSEN1
CPOX										up-no-survival
CLDND1										up-no-survival
MOK			up-no-survival
HSP90AA1
RBL1	up-no-survival		up-no-survival	up-no-survival						up-no-survival	up-no-survival
DLGAP4
IGSF9B	down-no-survival		down-no-survival						up-no-survival			down-no-survival	suppressor-like
CFHR2
NDC80	up-no-survival	up-no-survival		up-no-survival	up-no-survival	up-no-survival	oncogene-like	up-no-survival	up-no-survival	up-no-survival	up-no-survival		up-no-survival
AP4E1
RSBN1
MAGI3			down-no-survival		down-no-survival	down-no-survival	suppressor-like	down-no-survival	down-no-survival	down-no-survival
CXCL2	down-no-survival	down-no-survival	up-no-survival	down-no-survival			oncogene-like	up-no-survival	down-no-survival	down-no-survival			down-no-survival
AFP		down-no-survival	up-no-survival	up-no-survival	up-no-survival	up-no-survival	down-regulated-saver	down-regulated-saver	up-no-survival	up-no-survival	up-no-survival
COL4A4	down-no-survival						suppressor-like	down-no-survival	down-no-survival	down-no-survival			down-no-survival
TCF7			up-no-survival
OSTM1													down-no-survival
CDH7		up-no-survival	up-no-survival	up-no-survival			oncogene-like		up-no-survival	up-no-survival	up-no-survival
IMPG2				up-no-survival			down-no-survival	down-regulated-saver					down-no-survival
PCNP
EXD2
ARG2	down-no-survival		up-no-survival	up-no-survival	down-no-survival	down-no-survival	down-no-survival	down-no-survival	up-regulated-saver	up-no-survival
MEF2C	down-regulated-saver	down-no-survival	down-no-survival				up-regulated-saver			down-no-survival			down-no-survival
PTPRC			down-no-survival				Up-no-survival			down-no-survival		down-no-survival
CACNA1S				up-no-survival	down-no-survival	down-no-survival	suppressor-like	down-regulated-saver	down-no-survival	down-no-survival			up-no-survival
PKP1			up-no-survival				up-no-survival		up-no-survival	up-no-survival	up-no-survival	up-no-survival	up-no-survival
UBA5
STK17B			down-no-survival
CDC14B		down-no-survival
ZNF510
LRP2	up-no-survival		oncogene-like							down-no-survival	up-no-survival	down-no-survival	up-no-survival
ZNF506
JMJD4				up-no-survival
DUSP12
AACS													up-no-survival
DELE1
SLC13A1			suppressor-like				suppressor-like
CADPS2						down-no-survival	down-no-survival	down-no-survival		down-no-survival
PCDHB4	down-no-survival	down-no-survival	down-no-survival						down-no-survival				down-no-survival
PCDHA6				up-no-survival					up-no-survival			oncogene-like
PCDHGA2	down-no-survival	down-no-survival		up-no-survival	down-no-survival	down-no-survival				down-no-survival			down-no-survival
HSPB11
PHLPP1
ATP8B1			suppressor-like				down-no-survival
IL12RB2	up-no-survival	up-no-survival			up-no-survival	up-no-survival	up-no-survival	up-no-survival	up-no-survival	up-no-survival
SMARCD3	down-no-survival			up-no-survival		down-no-survival		up-no-survival
WDR70
FYB1			down-no-survival			up-regulated-saver	up-no-survival
MPP4			up-no-survival	up-no-survival	up-no-survival	up-no-survival	oncogene-like				up-no-survival
STRADB			down-no-survival		down-no-survival	down-no-survival						up-regulated-saver
BZW1
PGR	down-no-survival		down-no-survival			down-no-survival		down-no-survival	down-no-survival	down-no-survival	down-no-survival	up-no-survival	down-no-survival
C1QTNF3			down-no-survival	up-no-survival	down-no-survival		up-no-survival	up-no-survival			down-no-survival
ME2
C5orf22										up-no-survival
CCNT2
FAM135A					down-no-survival	down-no-survival
COL19A1	down-no-survival		down-no-survival				down-no-survival	down-no-survival		up-no-survival	down-no-survival	up-no-survival
EPB41L3			down-no-survival		down-no-survival				down-no-survival	down-no-survival	down-no-survival		down-no-survival
COBLL1		down-no-survival		suppressor-like			down-no-survival
DLG3					down-no-survival	down-no-survival
KCNK2	down-no-survival		down-no-survival						up-no-survival	up-no-survival		down-no-survival
SERTAD4			down-no-survival	up-no-survival		down-no-survival							down-no-survival
TRAF5			up-no-survival	up-no-survival					up-no-survival
GEMIN5
OPRK1		up-no-survival			up-no-survival				up-no-survival	up-no-survival		down-no-survival	up-no-survival
NFE2L1													suppressor-like
SEMA5B		up-no-survival		up-no-survival	up-no-survival	up-no-survival	up-no-survival	up-no-survival		up-no-survival	up-no-survival
GSK3B
ITGB5
ERC1	down-no-survival
XPO1										Up-no-survival
LINC01587		up-no-survival			down-no-survival		up-no-survival	up-no-survival	up-no-survival	up-no-survival
RNF13
TRPM3	down-regulated-saver	down-no-survival		up-no-survival			suppressor-like	down-no-survival				down-no-survival	down-no-survival
PALB2										Up-no-survival
DOP1A
LYRM2
BCKDHB				down-no-survival	down-no-survival	down-no-survival	suppressor-like
KAT6A
TUT7
ULK2
GRHL2							down-no-survival	down-no-survival		up-no-survival			up-no-survival
TNPO1
PLOD1					up-no-survival	up-no-survival	up-no-survival			up-no-survival			up-no-survival
P2RX5		up-no-survival					oncogene-like		up-no-survival	up-no-survival		down-no-survival	up-no-survival
ITGAE
DIS3
PIBF1
TDRD3
AC000061.1			up-no-survival								up-no-survival		up-no-survival
NUFIP1			up-no-survival
PDS5B													down-no-survival
OXCT1				up-no-survival			down-no-survival			up-no-survival
RRAGB													down-no-survival
EPYC	up-no-survival	up-no-survival	up-no-survival		up-no-survival	up-no-survival	up-no-survival		up-no-survival	up-no-survival	up-no-survival	up-no-survival	up-no-survival
CYLD
SLC27A5			up-no-survival	down-no-survival
ZNF324
ZNF671	down-no-survival		down-no-survival							down-no-survival
ZNF416
ZNF586
ZNF446
ZNF264
FAT1						Up-no-survival			Up-no-survival	Up-no-survival
YTHDC1
CHMP2B
SMAP2
PPIE
ZMPSTE24
STARD7
NOA1
REST
HAL		up-no-survival					up-no-survival	up-no-survival	up-no-survival		up-no-survival		up-no-survival
SSH1
GSTP1			up-no-survival										up-no-survival
APLP2										down-no-survival
FAM234B		up-no-survival						down-no-survival
SLCO1A2	up-no-survival	down-no-survival	oncogene-like		up-no-survival		down-no-survival		down-no-survival		up-no-survival		up-no-survival
WBP11
EIF3I
NKAIN1	up-no-survival	up-regulated-saver				down-no-survival	oncogene-like	up-no-survival	up-no-survival	up-no-survival			up-no-survival
COL16A1					up-no-survival	up-no-survival				up-no-survival			down-no-survival
TXLNA
APOB		down-no-survival					up-no-survival				down-no-survival	up-no-survival
NCOA1						down-no-survival
AGBL5
EFR3B	down-no-survival	up-no-survival							down-no-survival	down-no-survival
KIF3C	up-no-survival				up-no-survival	up-no-survival			up-no-survival	up-no-survival
RAB10					down-no-survival
GCKR	up-no-survival		up-no-survival	down-no-survival		down-no-survival	oncogene-like	oncogene-like	up-no-survival	up-no-survival		up-no-survival
HADHA
MAPRE3
CAD			up-no-survival	up-no-survival					up-no-survival	up-no-survival	up-no-survival
CD59
CD82							down-regulated-saver	down-no-survival
BCORL1
ATRX
AK6
FCN1	down-no-survival		down-no-survival	down-no-survival			up-no-survival		down-no-survival	down-no-survival	down-regulated-saver		down-no-survival
MYNN										up-no-survival
MECOM		down-no-survival			down-no-survival		down-no-survival	down-no-survival				Up-no-survival	Up-no-survival
SCAMP1
PREP
HACE1								down-no-survival
SEH1L
WDR47
WDFY1
OVGP1			up-no-survival					up-no-survival	up-no-survival
SLC25A24
MAP3K4
PILRA					up-no-survival	up-no-survival	up-no-survival	up-no-survival	down-no-survival	down-no-survival
IGSF9	up-no-survival	up-no-survival	down-no-survival		up-no-survival		down-no-survival	down-no-survival	up-no-survival	up-no-survival		up-no-survival	up-no-survival
ABCB1	down-no-survival	down-no-survival	down-no-survival				suppressor-like		down-no-survival	down-no-survival			down-no-survival
ZNF213
AKR1B1	up-no-survival				up-no-survival
CPNE3
RRN3
CTTN						up-no-survival
WNT11		down-no-survival	oncogene-like	down-no-survival			down-no-survival	down-no-survival	down-no-survival	up-no-survival	up-no-survival	down-no-survival	up-no-survival
MTIF2										up-regulated-saver
DDHD2
TTC39A		up-no-survival		oncogene-like	down-no-survival		up-no-survival	up-no-survival				up-no-survival	up-no-survival
EPS15
ORC1	up-no-survival	up-no-survival	up-no-survival	oncogene-like		up-no-survival			up-no-survival	up-no-survival	up-no-survival		oncogene-like
MGST2					down-no-survival	down-no-survival					down-no-survival
CHERP
ATG16L1
USP40
POMGNT1
RAD54L	up-no-survival	up-no-survival	up-no-survival	up-no-survival	up-no-survival	up-no-survival	oncogene-like	oncogene-like	up-no-survival	up-no-survival	up-no-survival		up-no-survival
MAST2			down-no-survival	up-no-survival					up-no-survival
DNAJA1
B4GALT1													up-no-survival
CHMP5
NFX1
AQP6			up-no-survival	up-no-survival			down-no-survival	down-no-survival	up-no-survival	up-no-survival		up-no-survival	up-no-survival
DIMT1
IPO11
FOLH1				suppressor-like		down-no-survival	up-no-survival	down-regulated-saver		up-no-survival		up-no-survival	up-regulated-saver
EIF2AK1									up-no-survival				up-no-survival
NME8		up-regulated-saver					oncogene-like	up-no-survival				up-no-survival
EPDR1	down-regulated-saver	down-no-survival	up-no-survival			down-no-survival				down-regulated-saver			down-no-survival
SNX10	up-no-survival				up-no-survival	up-no-survival	oncogene-like	up-no-survival			up-no-survival
SEPHS1
HBQ1	up-no-survival		up-no-survival		up-no-survival			up-no-survival					up-no-survival
ITPKC					down-no-survival	down-no-survival			down-no-survival	down-no-survival
CEACAM6		up-no-survival		down-no-survival	down-no-survival	down-no-survival		up-no-survival	up-no-survival	down-no-survival		up-no-survival	up-no-survival
FAT2		down-no-survival					down-no-survival		up-no-survival	up-no-survival	down-no-survival	up-no-survival	up-no-survival
RBM22
TMED2
ERO1B									up-regulated-saver		down-no-survival		down-no-survival
ZFAND6
HSD17B2		down-no-survival	down-no-survival						up-no-survival	up-no-survival	down-no-survival		up-no-survival
TXLNG			up-no-survival
PPEF1	up-no-survival	up-no-survival	up-no-survival	up-no-survival	oncogene-like	up-no-survival	oncogene-like	oncogene-like	up-no-survival	up-no-survival	up-no-survival	up-no-survival	up-no-survival
LAT2							oncogene-like	up-regulated-saver		down-no-survival
HUWE1
ZW10
ALG9	down-no-survival
MYBPC2			down-no-survival	up-no-survival				up-no-survival	up-no-survival	up-no-survival			up-no-survival
NOX4			up-no-survival	up-no-survival	up-no-survival	up-no-survival	down-no-survival	down-no-survival	up-no-survival	up-no-survival	up-no-survival	up-no-survival	down-no-survival
ACOX3					down-no-survival						down-no-survival
MTMR2
PPP1R15A	down-no-survival	down-no-survival							down-no-survival	down-no-survival		down-no-survival	down-no-survival
HSD17B14					up-no-survival
TRIP6			oncogene-like
ACHE							oncogene-like	up-no-survival	up-no-survival
FTL					up-no-survival	up-no-survival
SRRT
BAX		up-regulated-saver					Up-no-survival	Up-no-survival				Up-no-survival	Up-no-survival
NLK
PIGS
ADAMTS2			up-no-survival		up-no-survival	up-regulated-saver	up-no-survival	up-no-survival			up-no-survival	oncogene-like
TMPRSS11E	down-regulated-saver		up-no-survival		down-no-survival	down-no-survival			up-no-survival	up-no-survival	down-no-survival	up-no-survival	oncogene-like
ATXN7L3
PGS1
PSMC5
UIMC1
CETP		down-no-survival		down-no-survival	up-no-survival	up-no-survival	up-no-survival		down-no-survival	down-no-survival			up-no-survival
MMP2					up-no-survival	up-regulated-saver
MT3		up-regulated-saver		up-no-survival		down-no-survival	up-no-survival			up-no-survival			up-no-survival
LPCAT2		down-no-survival				up-no-survival
GNAO1	down-no-survival		down-no-survival	down-no-survival							down-no-survival		down-no-survival
OGFOD1
SH3BP2	up-regulated-saver						up-no-survival
NOP14
ADD1													down-no-survival
L2HGDH							suppressor-like	down-no-survival		up-no-survival
TXNDC16
RTRAF
NID2					up-no-survival	up-no-survival					up-no-survival		down-no-survival
GMCL1
SF3B2
KLHL42	down-no-survival												down-no-survival
GNAS													Up-no-survival
DNM1L
PTHLH	up-no-survival			up-no-survival	up-no-survival	up-no-survival	up-no-survival		up-no-survival	up-no-survival
PHACTR3			up-no-survival	down-no-survival		up-no-survival				down-no-survival		up-no-survival	down-no-survival
ERGIC2
TFAP2C							down-regulated-saver		up-no-survival	up-no-survival			up-no-survival
AURKA	up-no-survival	up-no-survival	up-no-survival	up-no-survival	up-no-survival	up-no-survival		oncogene-like	up-no-survival	up-no-survival	up-no-survival		up-no-survival
CASS4				down-no-survival			up-no-survival		down-no-survival	down-no-survival
PIR										up-no-survival			up-no-survival
AAMDC
RFX2	down-no-survival	down-no-survival					up-no-survival	up-no-survival	down-no-survival	down-no-survival			down-no-survival
METTL2A
SULT2B1		up-no-survival	up-no-survival		down-no-survival	down-no-survival	down-regulated-saver	down-no-survival			suppressor-like	up-no-survival	up-no-survival
ALG6
CNOT3
GP6	up-no-survival			down-no-survival	down-no-survival		up-no-survival			down-no-survival
PTPN4							suppressor-like	down-no-survival
DDX18
KHSRP
GNA11			suppressor-like								down-no-survival
ASAP3			down-no-survival		suppressor-like	down-no-survival	down-regulated-saver				down-no-survival
EDEM2													up-no-survival
DNMT3B	up-no-survival	up-no-survival	up-no-survival	up-no-survival	up-no-survival	up-no-survival		oncogene-like	up-no-survival	up-no-survival	up-no-survival		up-no-survival
REM1								down-no-survival	down-no-survival	down-no-survival			down-no-survival
TPX2	up-no-survival	up-no-survival	up-no-survival	up-no-survival	up-no-survival	up-no-survival	oncogene-like	oncogene-like	oncogene-like	up-no-survival	up-no-survival		up-no-survival
PDRG1	up-no-survival	up-no-survival	up-no-survival							up-no-survival
EPB41L1					down-no-survival	down-no-survival
SLC15A1	up-no-survival	up-no-survival	suppressor-like					up-no-survival	up-no-survival	up-no-survival	down-no-survival		up-no-survival
DOCK9					down-no-survival					down-no-survival		up-no-survival
ANKRD10
TGDS			up-no-survival
DOCK3			down-no-survival	up-no-survival	down-no-survival	down-no-survival	down-no-survival		up-no-survival	up-no-survival	down-no-survival		down-no-survival
C3orf18	down-no-survival		down-no-survival			down-no-survival				down-no-survival	down-no-survival		down-no-survival
COQ9
TMEM40			up-no-survival	oncogene-like	down-no-survival	down-no-survival	down-regulated-saver		up-no-survival	up-no-survival	down-no-survival	up-no-survival
KIF9			up-regulated-saver		down-no-survival	down-no-survival				down-no-survival
ARHGAP28	down-no-survival		down-no-survival	oncogene-like	up-no-survival			down-no-survival					down-regulated-saver
CRLS1			up-no-survival					up-no-survival		down-no-survival
DEFB127							down-no-survival
PPP1R13B
ATRN
SMOX			oncogene-like		up-no-survival		up-no-survival		oncogene-like	up-no-survival
SIGLEC1			down-no-survival	down-no-survival		up-no-survival	oncogene-like	up-no-survival	down-no-survival	down-no-survival
FKBP1A
NSFL1C
SLC4A11	up-no-survival		up-no-survival	up-no-survival		down-no-survival	down-no-survival	down-no-survival	up-no-survival	up-no-survival	up-no-survival		up-no-survival
C20orf194	down-no-survival	down-no-survival	down-no-survival						down-no-survival				down-no-survival
ZNF343
EBF4													down-no-survival
CPXM1			up-no-survival	up-no-survival	up-no-survival	up-no-survival			up-no-survival	up-no-survival	up-no-survival	down-no-survival
MAVS
LZTS3			oncogene-like			suppressor-like	down-no-survival				up-no-survival
F11				down-no-survival			down-no-survival	down-no-survival	down-no-survival	down-no-survival	down-no-survival	down-no-survival
XRN2
KIZ	down-no-survival
DYNLL1
TESC		down-no-survival	up-no-survival	up-no-survival		suppressor-like		up-no-survival	up-no-survival			up-no-survival	up-no-survival
SNX5
SIRPG		up-no-survival					up-no-survival	up-no-survival	up-no-survival			down-no-survival	up-regulated-saver
MAPKAPK5
P2RX7	down-no-survival		down-no-survival				up-no-survival	up-no-survival		down-no-survival			down-no-survival
ESF1											up-no-survival
RBBP9
ANAPC5
SLC23A2													down-no-survival
SLC8B1
TMEM230
DZANK1
KDM2B
CFAP61		up-no-survival		up-no-survival	down-no-survival	down-no-survival	down-regulated-saver		down-no-survival	down-no-survival	up-no-survival	down-no-survival
LHX5	up-no-survival	up-no-survival	up-no-survival		up-no-survival	up-no-survival		up-no-survival	oncogene-like	up-no-survival		up-no-survival	up-no-survival
TASP1
OAS1	up-regulated-saver	up-no-survival				up-no-survival	up-no-survival	up-no-survival	up-no-survival				up-no-survival
GCN1
PXN						up-no-survival
SIRT4
RPH3A			down-no-survival				up-no-survival		down-no-survival	down-no-survival		up-no-survival
KIF16B
TRMT6			up-no-survival							up-no-survival	up-no-survival
CHGB		up-no-survival	down-no-survival	up-no-survival	up-no-survival		down-no-survival	down-no-survival	up-no-survival	up-no-survival		up-no-survival
PEBP1						down-no-survival	down-no-survival
TBX5	down-no-survival		up-no-survival				oncogene-like		down-no-survival	down-regulated-saver
BRAP
ERP29
NOS1		down-no-survival	down-no-survival			down-no-survival	down-no-survival	down-no-survival	suppressor-like		down-no-survival	down-no-survival
FUS
IGBP1
FXYD5			up-no-survival			up-no-survival	oncogene-like	up-no-survival				up-no-survival
ZNF302													down-no-survival
GRAMD1A		up-no-survival	up-no-survival	oncogene-like	up-no-survival		oncogene-like
FXYD3	up-no-survival			up-no-survival	up-no-survival	up-no-survival	oncogene-like			up-no-survival			up-no-survival
HEPH	down-no-survival				up-no-survival			down-no-survival					down-no-survival
CDIP1	down-no-survival		down-no-survival										down-no-survival
CMTM1	up-no-survival				up-no-survival	up-no-survival			up-no-survival
KCNH4			up-no-survival	up-no-survival			up-no-survival		up-no-survival		up-no-survival
GANAB
GMIP							up-no-survival	up-no-survival					up-no-survival
RBM41
BIRC5	up-no-survival	up-no-survival	up-no-survival	oncogene-like	up-no-survival	up-no-survival	oncogene-like	oncogene-like	up-no-survival	up-no-survival	up-no-survival		up-no-survival
LAG3		up-no-survival			up-no-survival	up-no-survival	oncogene-like		up-no-survival	up-no-survival
MLF2										up-no-survival
OTUB2		up-no-survival	up-regulated-saver	oncogene-like					up-no-survival	up-no-survival			up-no-survival
DDX24
ZBTB25
NECAP1
ARHGAP4				up-no-survival	up-no-survival		oncogene-like
ANKRD24						down-no-survival
DHX32
RCOR1
GPATCH2L
LTBP4	down-no-survival	down-no-survival	down-no-survival			down-no-survival		down-no-survival	down-no-survival	down-no-survival	down-no-survival		down-no-survival
BLVRB											down-no-survival
SLC9A1			down-no-survival								down-no-survival
SPTLC1
PAPOLA
CCNK
PCBP4				up-no-survival									up-no-survival
RGS1	down-no-survival						up-no-survival	up-no-survival
YPEL3
NDUFB2
NUDC
MAEA
ICAM1						up-no-survival	up-no-survival		down-no-survival	down-no-survival		up-no-survival
STRN4
IRAK3	down-no-survival	down-no-survival								down-no-survival			down-no-survival
LYZ		up-no-survival	up-no-survival	up-no-survival	down-no-survival	down-no-survival	up-no-survival	up-no-survival	down-no-survival	down-no-survival
SI			down-no-survival	up-no-survival			oncogene-like				down-no-survival
MUL1
TFAP4	up-no-survival		up-no-survival						up-no-survival	up-no-survival
PDCD7
SPG21
FETUB			down-no-survival	down-no-survival			down-regulated-saver		oncogene-like	up-no-survival	down-no-survival	up-no-survival
DNAJB11										up-no-survival			up-no-survival
P3H2		down-no-survival	down-no-survival	down-no-survival	up-no-survival	up-no-survival			down-no-survival		down-no-survival		down-no-survival
THPO		up-no-survival							up-no-survival	up-no-survival	up-no-survival
CHRD	down-no-survival	up-no-survival							up-no-survival				down-no-survival
FLT3LG				up-no-survival			oncogene-like
RAB11FIP3
GNPTG
ZNF268
GOLGA3
PABPC4
CD209		down-no-survival	down-no-survival			up-no-survival							down-no-survival
CERS4													up-no-survival
MCOLN1									down-no-survival	down-no-survival
USP48
EFNB1		down-no-survival			up-no-survival	up-no-survival			down-no-survival
PDPR
AARS1
GLG1
KIF4A	up-no-survival	up-no-survival	up-no-survival	up-no-survival	up-no-survival	up-no-survival	oncogene-like	oncogene-like	up-no-survival	up-no-survival	up-no-survival		up-no-survival
TNRC6A
PLEKHG2				up-no-survival			up-no-survival					up-no-survival
DLL3	up-no-survival	up-no-survival	up-no-survival	up-no-survival	up-no-survival	up-no-survival	oncogene-like	up-no-survival	up-no-survival	up-no-survival	up-no-survival		up-no-survival
NAT14	up-no-survival	up-no-survival		up-no-survival	up-no-survival			up-no-survival
PITPNM2	down-no-survival
EXOC1
RBM27
POU4F3		oncogene-like
OSBPL8													down-no-survival
DTX2							oncogene-like	up-no-survival	up-no-survival	up-no-survival			up-no-survival
NLRC4							up-no-survival		down-no-survival	down-no-survival
PUS7			up-no-survival						up-no-survival	up-no-survival	up-no-survival
LAMB4				up-no-survival	down-no-survival	down-no-survival	down-no-survival	down-no-survival			down-no-survival		up-no-survival
NRCAM	up-no-survival	up-no-survival	oncogene-like	up-no-survival	up-no-survival					up-no-survival	up-no-survival	up-no-survival	up-no-survival
LAMB1					up-no-survival	up-no-survival		up-no-survival
SLC26A4		down-no-survival				down-no-survival	down-no-survival	down-no-survival	up-no-survival			down-no-survival
SLC26A3	down-no-survival	down-no-survival	suppressor-like	up-no-survival					down-no-survival	down-no-survival	down-no-survival
DLD
WDR7			down-no-survival
TXNL1
IL5RA			down-no-survival	down-no-survival			down-no-survival	down-no-survival	down-no-survival	down-no-survival	down-no-survival	down-no-survival
ABCC6		down-no-survival				down-no-survival				down-no-survival
CMTM6				down-no-survival
ITGA6				up-no-survival	up-no-survival	up-no-survival				up-no-survival
RAPGEF4								down-no-survival	down-no-survival	down-no-survival			down-regulated-saver
MAP3K20	down-no-survival	down-no-survival											down-no-survival
SMPX	down-no-survival		down-no-survival	oncogene-like	down-no-survival				up-no-survival	up-no-survival		up-no-survival
FH
SEL1L3					up-no-survival		up-no-survival	up-no-survival				up-no-survival	up-no-survival
TF		down-no-survival			down-no-survival	down-no-survival	oncogene-like		up-no-survival	up-no-survival
CDV3
MYO15A					up-no-survival
ALKBH5
APOH	up-no-survival						down-regulated-saver	down-no-survival		down-no-survival	up-no-survival	up-no-survival
NLRP1		down-no-survival					up-no-survival						down-no-survival
PITPNM3	down-no-survival		down-no-survival	suppressor-like	suppressor-like		down-no-survival	down-no-survival			down-no-survival
SPAG7
ORC6	up-no-survival	up-no-survival	up-no-survival	up-no-survival	up-no-survival	up-no-survival	oncogene-like	up-no-survival	up-no-survival	up-no-survival	up-no-survival		oncogene-like
ZFHX4	down-regulated-saver	down-no-survival	down-no-survival					oncogene-like	up-no-survival	up-no-survival			down-no-survival
SLC17A6
CPA1		down-no-survival		up-no-survival			down-regulated-saver	down-no-survival	down-no-survival	down-no-survival
ZC3HC1								up-no-survival
ESR1	down-no-survival	Up-no-survival	down-no-survival	down-no-survival								Up-no-survival
RGS17				up-no-survival			oncogene-like	oncogene-like	up-no-survival	up-no-survival
ANGPT2			up-no-survival		up-no-survival	up-no-survival	up-no-survival				up-no-survival
TMEM101													up-no-survival
CD200	down-regulated-saver	down-no-survival		up-no-survival	up-no-survival		up-no-survival	up-no-survival					down-no-survival
CCDC80	down-regulated-saver	down-no-survival	down-no-survival	up-no-survival									down-no-survival
CMA1	down-no-survival	down-no-survival	down-no-survival		down-no-survival			up-no-survival	down-no-survival	down-no-survival	down-no-survival	up-no-survival	down-no-survival
PSME1
PPP2R3C
HAUS4
JPH4	down-no-survival	down-no-survival	down-no-survival				suppressor-like	down-no-survival	down-no-survival	down-no-survival	down-no-survival		down-no-survival
MYH7		up-no-survival			down-no-survival	down-no-survival	down-no-survival	down-no-survival	up-no-survival	up-no-survival	down-no-survival	down-no-survival	up-no-survival
CEBPE			down-no-survival		up-no-survival	up-no-survival	up-no-survival			down-no-survival
SLC7A8		up-no-survival		down-no-survival	up-no-survival	up-no-survival	down-no-survival	down-no-survival		up-no-survival	down-no-survival		down-no-survival
OSGEP
SLC22A17	down-no-survival		down-no-survival			down-no-survival					down-no-survival		down-no-survival
RNF31				up-no-survival			oncogene-like
SCFD1
G2E3
HECTD1					down-no-survival
HNRNPC
RPGRIP1
SUPT16H
TOX4
GEMIN2										up-no-survival
TGM1	up-no-survival				down-no-survival	down-no-survival		down-no-survival	down-no-survival	up-no-survival	up-no-survival	up-no-survival	down-no-survival
TINF2
DAZL		up-regulated-saver			up-no-survival		down-no-survival		up-regulated-saver	up-no-survival
TBL1Y							down-no-survival	down-no-survival
SEMA6A		down-no-survival	down-no-survival			down-no-survival	up-regulated-saver	oncogene-like	down-no-survival
TRPM7
TYRO3		down-no-survival	up-no-survival	oncogene-like	down-no-survival	down-no-survival	down-no-survival	down-regulated-saver				up-no-survival	down-no-survival
WDR76	up-no-survival	up-no-survival		up-no-survival					up-no-survival	up-no-survival			up-no-survival
CAPN3		down-no-survival			down-no-survival	down-no-survival	oncogene-like		down-no-survival	down-no-survival		up-no-survival
SNAP23
TBX15		down-no-survival	up-no-survival	down-no-survival	down-no-survival	down-no-survival	oncogene-like	oncogene-like	up-no-survival	up-no-survival	up-no-survival		up-no-survival
PHGDH			up-no-survival	down-no-survival		down-no-survival	down-no-survival	down-no-survival		up-regulated-saver
COL9A3		up-no-survival	up-no-survival				down-regulated-saver		up-no-survival	up-no-survival	up-no-survival		up-no-survival
EZR		up-no-survival											up-no-survival
MYL6
AGO1
TEKT2	up-no-survival								down-no-survival	down-no-survival
CLSPN	up-no-survival	up-no-survival	up-no-survival	oncogene-like	up-no-survival	up-no-survival	oncogene-like	up-no-survival	up-no-survival	up-no-survival	up-no-survival		up-no-survival
RFFL
UNC13D	up-no-survival	up-no-survival					oncogene-like	up-no-survival		down-no-survival
MFSD11
DPYSL2	down-no-survival	down-no-survival							suppressor-like	down-no-survival			down-no-survival
TGFB2								down-no-survival	down-no-survival	down-no-survival	up-no-survival	up-no-survival
GPATCH2
NUP50
CDC45	up-no-survival	up-no-survival	up-no-survival	up-no-survival	up-no-survival	up-no-survival	oncogene-like	up-no-survival	up-no-survival	up-no-survival	up-no-survival	up-no-survival	up-no-survival
COMT			up-no-survival
ADA2			down-no-survival						suppressor-like	down-no-survival
AC016026.1		down-no-survival			up-no-survival	up-no-survival	oncogene-like	up-no-survival		up-no-survival			down-no-survival
VNN3		up-no-survival	up-no-survival				up-no-survival	up-no-survival		down-no-survival		down-no-survival
ECHDC1		down-no-survival
LRRFIP2								up-no-survival
SEC22C										down-no-survival
XYLB	up-no-survival						suppressor-like	down-no-survival	up-no-survival	up-no-survival			oncogene-like
HDAC6
OR1I1							up-no-survival				up-no-survival	down-no-survival
GABRP			up-no-survival	down-no-survival	down-no-survival	down-no-survival	down-no-survival	down-regulated-saver	up-no-survival	up-no-survival	up-no-survival	up-no-survival
KRT31	up-no-survival	up-no-survival	up-no-survival		down-no-survival	down-no-survival		up-no-survival		up-no-survival		up-no-survival	up-no-survival
CDC6	up-no-survival	up-no-survival	up-no-survival	up-no-survival	up-no-survival	up-no-survival	oncogene-like	up-no-survival	oncogene-like	up-no-survival	up-no-survival		up-no-survival
UPRT					down-no-survival
CDC23
AAAS
CBX5
FMO2	down-no-survival	down-no-survival	down-no-survival	down-no-survival	down-no-survival	down-no-survival			down-no-survival	down-no-survival	down-no-survival	down-no-survival	down-no-survival
SUCO				up-no-survival
MSH2				Up-no-survival						Up-no-survival	Up-no-survival
MAP3K1
DHPS			up-no-survival	up-no-survival	up-no-survival		oncogene-like	up-no-survival		up-no-survival
HOOK2													up-no-survival
NXPE1		down-no-survival	down-no-survival
ARCN1
EPB41L4B		down-no-survival	down-no-survival	down-no-survival			down-regulated-saver	down-no-survival					up-no-survival
TMEM38B								down-no-survival		up-no-survival			down-no-survival
PSMD5
PTGS1	down-no-survival		down-no-survival					down-no-survival			down-no-survival
NUP188													up-no-survival
CRAT			down-no-survival		down-no-survival	down-no-survival
[truncated: 34,612 more rows]

## Sheet: Suppl.Table S5
Suppl. Table S5. Genes and parameters for SAHR model
BLCA					BRCA					COAD					HCC					KIRC					KIRP					LC					LUAD					LUSC					STAD
Gene Name	Gene Type	Cut Off	HR		Gene Name	Gene Type	Cut Off	HR		Gene Name	Gene Type	Cut Off	HR		Gene Name	Gene Type	Cut Off	HR		Gene Name	Gene Type	Cut Off	HR		Gene Name	Gene Type	Cut Off	HR		Gene Name	Gene Type	Cut Off	HR		Gene Name	Gene Type	Cut Off	HR		Gene Name	Gene Type	Cut Off	HR		Gene Name	Gene Type	Cut Off	HR
ZBBX	oncogene-like	0	1.87941		LINC01508	oncogene-like	0.0688	2.89382		AC034213.1	oncogene-like	0.0393	2.84667		GAGE2A	oncogene-like	0	3.99966		LINC00524	oncogene-like	0	3.79201		ELOVL2	oncogene-like	0.2337	5.86443		MS4A15	oncogene-like	0.0466	4.20778		DKK1	oncogene-like	0.8825	2.26559		AC096589.1	oncogene-like	0	1.89834		PRR9	oncogene-like	0	2.29462
TCHHL1	oncogene-like	0	1.78182		TRPC7	oncogene-like	0	2.25692		HOXC13	oncogene-like	0	2.42085		GAGE1	oncogene-like	0	4.03269		OMG	oncogene-like	0.1109	3.41737		IGF2BP3	oncogene-like	0.0142	5.37241		LINC01203	oncogene-like	0.0114	3.73037		ATP8B3	oncogene-like	0.3819	2.24854		POSTN	oncogene-like	50.8334	1.84424		AC237221.1	oncogene-like	0.031	2.32492
LINC02709	oncogene-like	0.1637	1.77772		MAL2	oncogene-like	62.7099	2.36308		BAMBI	oncogene-like	7.8121	2.52231		U95743.1	oncogene-like	0	3.67539		AC080013.3	oncogene-like	0.1668	3.44057		MYBL1	oncogene-like	0.8327	4.81717		AL354953.1	oncogene-like	0.501	3.60837		MIR924HG	oncogene-like	0.0564	2.12909		AC011509.3	oncogene-like	0	1.76242		AL136981.3	oncogene-like	0.0148	2.18853
CLDN6	oncogene-like	0.0351	1.68759		USP41	oncogene-like	0.0621	2.23931		LBX2	oncogene-like	0.4991	2.5432		FLJ36000	oncogene-like	0	3.44845		SPC24	oncogene-like	1.0069	3.37249		HOXC13-AS	oncogene-like	0	4.79996		AL589182.1	oncogene-like	0	3.54588		AC107373.2	oncogene-like	0	2.00878		AC012363.1	oncogene-like	0	1.84934		SLC22A16	oncogene-like	0.022	2.11046
NXPH4	oncogene-like	1.3705	1.6419		ZIC2	oncogene-like	0.0958	2.18983		AC010378.1	oncogene-like	0.657	2.49091		BRSK1	oncogene-like	0.3495	3.49792		AC103703.1	oncogene-like	0.0395	3.33012		NPTX2	oncogene-like	0.1697	5.33232		AC025419.1	oncogene-like	0.0146	3.47545		GJB2	oncogene-like	8.3567	1.95219		AL353768.1	oncogene-like	0.0488	1.76921		STOML3	oncogene-like	0.0382	2.0662
KLK5	oncogene-like	0	1.72176		AL391650.2	oncogene-like	0	2.19207		AC012213.2	oncogene-like	0.0107	2.45881		AC093730.1	oncogene-like	0	3.21196		U47924.3	oncogene-like	0.2855	3.29665		EME1	oncogene-like	0.2967	4.89252		LINC02763	oncogene-like	0.0408	3.95177		LINC01913	oncogene-like	0.0198	1.9269		LINC02434	oncogene-like	0	1.77834		AC131956.2	oncogene-like	0.0261	2.04529
PURPL	oncogene-like	0.0072	1.63646		NKX2-3	oncogene-like	0	2.09042		AC012531.1	oncogene-like	0	2.40463		LINC01968	oncogene-like	0	3.73321		AL355999.1	oncogene-like	0.3598	3.24525		IKBIP	oncogene-like	9.4644	4.56387		MMP1	oncogene-like	75.9913	3.48143		AC087588.2	oncogene-like	0.1443	1.92559		SLC1A6	oncogene-like	0.0482	1.72623		HOXD-AS2	oncogene-like	0.0455	2.02363
CTSV	oncogene-like	1.6411	1.61967		AC012433.2	oncogene-like	0	2.14985		LINC01836	oncogene-like	0.5024	2.39477		RHOXF2B	oncogene-like	0	3.61882		CCNB2	oncogene-like	1.4564	3.25405		IL36B	oncogene-like	0	3.66839		NECTIN3-AS1	oncogene-like	0.171	3.35135		AC090192.2	oncogene-like	0.0446	1.93564		AL135937.1	oncogene-like	0	1.73711		SERPINE1	oncogene-like	21.9291	1.9911
CALR	oncogene-like	361.921	1.6148		IVL	oncogene-like	0.0194	2.14276		AC010789.2	oncogene-like	0	2.36277		Z98200.1	oncogene-like	0.0862	3.0085		TEDC2	oncogene-like	0.3358	3.19998		C1QTNF6	oncogene-like	2.3536	4.62204		TDRD5	oncogene-like	0.2381	3.41678		MDFI	oncogene-like	7.4102	1.90142		IER5L	oncogene-like	2.8448	1.70099		AC093895.1	oncogene-like	0.0494	1.98659
AL359091.4	oncogene-like	1.1209	1.61698		RNF139-AS1	oncogene-like	0.4475	2.09833		NPC1L1	oncogene-like	0.1787	2.30296		RHPN1-AS1	oncogene-like	0.3424	3.13587		WFDC3	oncogene-like	0.2166	3.23882		PLK1	oncogene-like	0.7001	4.59979		HOXB8	oncogene-like	0.1853	3.48816		C1QTNF6	oncogene-like	3.8935	1.90127		AC025284.1	oncogene-like	0	1.71196		AC096759.2	oncogene-like	0	1.98834
AC019211.1	oncogene-like	0	1.69556		ERVV-1	oncogene-like	0	2.324		AC083967.1	oncogene-like	0	2.29667		LINC01559	oncogene-like	0	2.97067		AC090192.2	oncogene-like	0.014	3.14382		NRG1	oncogene-like	1.127	4.48055		AL139220.2	oncogene-like	0.058	3.37958		SCAT1	oncogene-like	0.3247	1.86228		HMMR-AS1	oncogene-like	0	1.68724		LINC02465	oncogene-like	0	2.12944
DPF1	oncogene-like	0.1469	1.60545		AL355881.1	oncogene-like	0.0534	2.05795		DLX2	oncogene-like	0.0278	2.30973		LINC02008	oncogene-like	0	2.84542		TICRR	oncogene-like	0.169	3.12092		AC027228.2	oncogene-like	0.0461	4.04282		AL355916.1	oncogene-like	0.1954	3.33338		PTPRH	oncogene-like	2.4522	1.84395		AC010624.5	oncogene-like	0.0535	1.66845		CAMTA1-IT1	oncogene-like	0	1.97786
ELDR	oncogene-like	0	1.65054		PXDNL	oncogene-like	0.2988	2.07348		FJX1	oncogene-like	2.1093	2.27961		PFKFB4	oncogene-like	0.3717	2.82655		JAK3	oncogene-like	4.2116	3.17288		AC073140.2	oncogene-like	0	4.59947		AC107419.1	oncogene-like	0.0125	3.26014		VGF	oncogene-like	0.1816	1.84089		DPYSL5	oncogene-like	0.0138	1.67155		LINC00973	oncogene-like	0	1.92346
BEST2	oncogene-like	0.0129	1.60399		KRT86	oncogene-like	0.5075	2.07304		ITIH2	oncogene-like	0.0365	2.26252		AC114489.2	oncogene-like	0	2.64634		CCNF	oncogene-like	0.6056	3.15947		PTRH2	oncogene-like	3.5012	4.01586		PNMA6A	oncogene-like	0.2276	3.17592		AC007255.1	oncogene-like	0.1223	1.83976		HOXC5	oncogene-like	0.0281	1.66783		SPP1	oncogene-like	24.3301	1.91538
CTAG2	oncogene-like	0	1.57373		LINC01574	oncogene-like	0	2.05526		MYOSLID	oncogene-like	0.0325	2.24305		LASTR	oncogene-like	0.0479	2.84048		LINC00466	oncogene-like	0	3.03734		TRIP13	oncogene-like	1.3769	4.55326		SP8	oncogene-like	0.0405	3.23499		TFAP2A	oncogene-like	1.0131	1.82324		CBLN1	oncogene-like	0.0254	1.65454		CGB8	oncogene-like	0	1.89366
AL391704.1	oncogene-like	0	1.5794		SMIM41	oncogene-like	0	1.98585		AC002076.1	oncogene-like	0	2.14843		LINC02003	oncogene-like	0	2.64037		AC103769.1	oncogene-like	0	3.33874		FOXD2-AS1	oncogene-like	1.3763	4.49576		AC111197.1	oncogene-like	0.0504	3.01936		STRIP2	oncogene-like	1.0421	1.81172		ADAMTS18	oncogene-like	0.0675	1.66613		LGSN	oncogene-like	0.0187	1.89072
FOXD1	oncogene-like	0.1924	1.57927		LINC02200	oncogene-like	0	2.01881		NMB	oncogene-like	7.0018	2.21399		DHDH	oncogene-like	0.2377	2.69209		BIRC5	oncogene-like	1.4625	3.13981		TOP2A	oncogene-like	1.6876	4.09559		RAD54B	oncogene-like	0.4309	3.11014		AC011294.1	oncogene-like	0.3054	1.82117		AC093274.1	oncogene-like	0	1.67575		DCLK3	oncogene-like	0.1185	1.88274
RGS19	oncogene-like	11.4393	1.57151		LINC02492	oncogene-like	0	1.99159		AC020891.2	oncogene-like	0.2124	2.31064		AC145343.1	oncogene-like	0.2926	2.61377		CELSR3	oncogene-like	0.1209	3.03388		AC007387.2	oncogene-like	0	3.89259		SMC1B	oncogene-like	0.0476	3.21092		GREB1L	oncogene-like	0.2125	1.80189		AC078906.1	oncogene-like	0.0631	1.65503		AC068228.3	oncogene-like	0.0532	1.87937
HSD17B1	oncogene-like	1.1535	1.55134		AC018978.1	oncogene-like	0	2.06184		Z97192.1	oncogene-like	0	2.41743		LINC00160	oncogene-like	0	2.57759		AC116021.1	oncogene-like	0.0369	3.03797		AC005324.3	oncogene-like	0	4.84299		AC099506.1	oncogene-like	0.013	3.16039		HOXB7	oncogene-like	5.4569	1.78714		AC096589.2	oncogene-like	0.0262	1.64445		LINC00355	oncogene-like	0.0424	1.88181
FAM133A	oncogene-like	0.0142	1.55631		DRP2	oncogene-like	0.1234	1.99567		LRRN4	oncogene-like	0.0818	2.1787		LPCAT1	oncogene-like	3.8321	2.70279		KIF18B	oncogene-like	0.4604	3.07585		XRCC2	oncogene-like	0.309	3.87128		PRLR	oncogene-like	0.0542	2.87835		KAT2B	suppressor-like	4.2348	2.0237		TMEM196	oncogene-like	0	1.63146		AC064874.1	oncogene-like	0.0477	1.86731
AL136531.2	suppressor-like	0.0941	1.87963		AC007686.3	suppressor-like	0.2007	2.71938		SLC44A4	suppressor-like	84.4552	2.43645		CCDC38	suppressor-like	0.1542	3.38757		MPP7	suppressor-like	1.0417	3.33718		PRKN	suppressor-like	0.7524	3.7494		PERM1	suppressor-like	0.1354	6.05699		ADGRD1	suppressor-like	1.5776	1.95128		GUCA2A	suppressor-like	0	1.80632		NLRX1	suppressor-like	3.8889	2.44302
AL357033.4	suppressor-like	0.6988	1.7682		TP53AIP1	suppressor-like	0.0908	2.25879		LINGO4	suppressor-like	0.0343	2.35883		HMGCS2	suppressor-like	370.643	2.68465		SLC27A2	suppressor-like	13.5837	3.20987		AL031123.4	suppressor-like	0	3.22875		TRIP10	suppressor-like	14.3322	4.23739		AC124854.1	suppressor-like	0	1.85129		AC012409.3	suppressor-like	0.0303	1.77236		ZBED2	suppressor-like	0.3691	2.242
LINC01229	suppressor-like	0.0084	1.74114		IFNE	suppressor-like	0.0162	2.07901		CLCA1	suppressor-like	10.882	2.29091		CFHR3	suppressor-like	11.1574	2.61539		SOWAHB	suppressor-like	3.2048	3.15013		AC092295.2	suppressor-like	0.7113	3.64991		CFD	suppressor-like	10.1874	3.83334		CYP17A1	suppressor-like	0.0141	1.88778		RSPH10B	suppressor-like	0.0093	1.72046		GATD3B	suppressor-like	0.7391	2.26532
ZNF471	suppressor-like	0.4619	1.73043		PLEKHA4	suppressor-like	6.0866	2.01497		GPA33	suppressor-like	83.3416	2.26887		AMDHD1	suppressor-like	19.6001	2.45238		KL	suppressor-like	15.4301	2.96103		BCL2L10	suppressor-like	0.7833	3.41424		AC116407.1	suppressor-like	0.067	3.89398		CA4	suppressor-like	0.3126	1.87411		DNAH2	suppressor-like	0.2095	1.7057		TRIM29	suppressor-like	3.787	2.21103
AC097505.1	suppressor-like	0.0695	1.72803		LIFR-AS1	suppressor-like	0.1303	1.98262		GGT6	suppressor-like	21.6686	2.17189		CD69	suppressor-like	0.4734	2.33965		TSPYL1	suppressor-like	12.7633	2.96113		CYB5A	suppressor-like	12.3979	3.29466		GPT	suppressor-like	0.4983	3.80783		AC092078.3	suppressor-like	0.0079	1.84619		LINC02344	suppressor-like	0	3.05144		PGLYRP2	suppressor-like	0.0485	2.08104
KLF3-AS1	suppressor-like	0.2404	1.69013		NACAD	suppressor-like	0.4296	1.96499		CPT2	suppressor-like	1.847	2.16124		FOLH1	suppressor-like	1.6205	2.36937		TLN2	suppressor-like	4.7213	2.95206		AL118556.2	suppressor-like	0	2.96872		LINC00957	suppressor-like	0.3704	4.11167		CCDC13-AS1	suppressor-like	0.044	1.83488		LINC00570	suppressor-like	0	1.64116		BTNL2	suppressor-like	0	2.01911
SYT15	suppressor-like	0.0244	1.68632		PPP2R2B	suppressor-like	0.0511	1.96208		TEX11	suppressor-like	0.0884	2.19814		PDE2A	suppressor-like	0.8663	2.30705		SLC16A12	suppressor-like	16.5011	2.95903		TREH	suppressor-like	0.95	3.24814		VILL	suppressor-like	1.0621	3.64494		KHDRBS2-OT1	suppressor-like	0	1.81749		AC011444.2	suppressor-like	0	1.61025		TTC9	suppressor-like	2.0231	2.0426
CALCOCO1	suppressor-like	7.3621	1.67347		OVAAL	suppressor-like	0	1.916		AP002498.1	suppressor-like	0.2307	2.15256		BEND4	suppressor-like	0	2.26489		PCCA	suppressor-like	5.2456	2.84657		SFTPD	suppressor-like	0.1834	3.10387		THRSP	suppressor-like	0	3.46327		AL078645.1	suppressor-like	0	1.80444		AC011997.2	suppressor-like	0	1.80003		KRT15	suppressor-like	0.7071	2.05211
HTR4	suppressor-like	0	1.65239		LRRC2	suppressor-like	0.0753	1.92486		KBTBD11	suppressor-like	4.5416	2.1436		CD302	suppressor-like	1.9633	2.35442		LRRC19	suppressor-like	3.3456	2.73672		SOCS2-AS1	suppressor-like	0.1892	3.25815		RNF39	suppressor-like	3.7153	3.8848		AC011444.3	suppressor-like	0	1.81292		ZRANB2-AS1	suppressor-like	0.035	1.63309		CTNNBIP1	suppressor-like	6.6609	1.97445
RGL4	suppressor-like	0.0639	1.64813		TPM1-AS	suppressor-like	0.0307	1.97591		TRPC7-AS1	suppressor-like	0.3271	2.10354		DNASE1L3	suppressor-like	2.5047	2.25511		PANK1	suppressor-like	2.5591	2.68336		FECH	suppressor-like	4.3458	3.2011		TCEA3	suppressor-like	6.0483	3.40485		GNG7	suppressor-like	1.7838	1.80029		GSTA2	suppressor-like	0.1331	1.57812		ID1	suppressor-like	56.6764	1.97921
RNASE4	suppressor-like	0.0824	1.65711		BEND5	suppressor-like	1.0805	1.93769		SLC13A2	suppressor-like	1.1561	2.09817		CCL23	suppressor-like	0.2753	2.26316		CRYL1	suppressor-like	33.6487	2.67043		AC024022.1	suppressor-like	0.0829	3.02285		TCP11L2	suppressor-like	1.1942	3.25504		AC091607.2	suppressor-like	0.0449	1.77005		AC013470.2	suppressor-like	0.0554	1.57372		BFSP2	suppressor-like	0.0861	1.92846
LARGE1	suppressor-like	1.5471	1.65057		AL512358.2	suppressor-like	0	3.73089		SELENBP1	suppressor-like	64.7305	2.07925		MMUT	suppressor-like	25.3939	2.26541		SUCLA2	suppressor-like	5.0603	2.66366		RCAN2	suppressor-like	5.6365	3.10119		NIPSNAP3B	suppressor-like	0.1994	3.26451		COL6A6	suppressor-like	0.4193	1.77473		LINC02580	suppressor-like	0.088	1.55093		XDH	suppressor-like	1.9776	1.91601
AL035653.1	suppressor-like	0.0911	1.63738		AC053545.1	suppressor-like	0.0209	1.87264		AC135012.3	suppressor-like	0.0428	2.10389		TCF21	suppressor-like	0.0741	2.20007		ACADM	suppressor-like	16.0182	2.67401		SORL1	suppressor-like	4.4265	3.08879		RNF225	suppressor-like	0.6149	3.22946		INMT-MINDY4	suppressor-like	0	2.18356		MICU3	suppressor-like	0.533	1.54311		AC005237.1	suppressor-like	0.0574	1.92362
AL139383.1	suppressor-like	0.0253	1.61709		GIMAP1	suppressor-like	0.8461	1.91496		CA2	suppressor-like	13.4729	2.05403		TMEM220-AS1	suppressor-like	0.6893	2.21068		IQGAP2	suppressor-like	6.1282	2.66241		NDRG2	suppressor-like	12.2363	2.86118		AC011442.1	suppressor-like	0.0771	3.07298		HACD4	suppressor-like	2.0491	1.75776		AC083805.2	suppressor-like	0.1362	1.5141		GNG8	suppressor-like	0.3372	1.89659
VSIG1	suppressor-like	0.2508	1.6201		PGM5P4-AS1	suppressor-like	0	1.85837		TMEM72	suppressor-like	0.2522	2.03447		SLC38A4	suppressor-like	56.0961	2.16682		ALDH6A1	suppressor-like	7.4052	2.7158		AC130371.2	suppressor-like	2.2152	3.0408		AC090241.2	suppressor-like	0.0065	3.16496		GGTLC3	suppressor-like	0.0291	1.76203		LINC02660	suppressor-like	0	1.53249		LINC01644	suppressor-like	0.083	1.8802
AQP3	suppressor-like	75.2103	1.61183		CBX7	suppressor-like	2.6355	1.88132		SLC7A3	suppressor-like	0	1.98575		TGFBR3	suppressor-like	1.8262	2.09403		MMUT	suppressor-like	13.1284	2.6315		DNAJC11	suppressor-like	6.3859	2.90444		ASAP3	suppressor-like	6.0444	3.13315		LRRK2-DT	suppressor-like	1.2582	1.73776		MPIG6B	suppressor-like	0.1522	1.51206		STARD5	suppressor-like	0.2787	1.86858
EFCAB6	suppressor-like	0.0605	1.60885		SCRN2	suppressor-like	7.6168	1.86421		LINC01571	suppressor-like	0	2.19415		MYOM2	suppressor-like	0.0926	2.08685		TRPM3	suppressor-like	0.7981	2.55646		AC025271.4	suppressor-like	0.0662	2.82058		FAXDC2	suppressor-like	0.727	2.99862		CACNA2D2	suppressor-like	3.1893	1.7479		AL355312.5	suppressor-like	0.0217	1.51201		SNX22	suppressor-like	0.2473	1.85029
AC092375.2	suppressor-like	0.0624	1.59333		LRIG2-DT	suppressor-like	0.1028	1.82274		AC104819.3	suppressor-like	0.243	2.00884		PPARGC1A	suppressor-like	2.7348	2.09195		GSTM3	suppressor-like	4.2045	2.55256		NAMA	suppressor-like	0	2.615		AC011751.1	suppressor-like	0	3.08714		AC005479.2	suppressor-like	0.6271	1.73208		EXPH5	suppressor-like	1.4763	1.50154		PDZD3	suppressor-like	0.4913	1.86168
ID2-AS1	suppressor-like	0.1126	1.58878		TMEM151B	suppressor-like	0.0066	1.83365		HRCT1	suppressor-like	5.5064	1.99934		ASPA	suppressor-like	0.3016	2.09887		AP003721.4	suppressor-like	0.3436	2.50594		NKAPL	suppressor-like	0.1659	2.98623		PCBP1-AS1	suppressor-like	0.3223	2.92271		KHDRBS2	suppressor-like	0.2999	1.72881		PHYHD1	suppressor-like	1.3875	1.51143		AL512631.1	suppressor-like	0.0515	1.85516
CHRM3-AS2	suppressor-like	0.0197	1.58303		AC005998.1	suppressor-like	0	2.3783		GLB1L3	suppressor-like	0.0047	2.04731		SLC2A2	suppressor-like	94.9126	2.06942		ABCD3	suppressor-like	9.0965	2.50484		SLC45A1	suppressor-like	0.5509	2.81379		MEIS1	suppressor-like	1.0266	3.00195		ZPBP2	up-regulated-saver	0	1.95659		PSMD6-AS2	suppressor-like	0.1211	1.51648		KHK	suppressor-like	1.5764	1.83309
AL353150.1	up-regulated-saver	1.3845	2.08549		AC087239.1	up-regulated-saver	0.2636	2.44095		LINC01555	up-regulated-saver	0.2863	2.54335		AC090360.1	up-regulated-saver	0.0438	2.25922		AC124854.1	up-regulated-saver	3.9994	2.95517		NXPE4	up-regulated-saver	0.0447	4.15296		KIFC2	up-regulated-saver	3.8797	6.38728		AC048383.1	up-regulated-saver	0	1.81855		AL355538.2	up-regulated-saver	0	2.11441		AC010476.2	up-regulated-saver	0	2.50324
AIFM3	up-regulated-saver	0.7695	2.10433		PYCARD	up-regulated-saver	13.9269	2.41631		CLCN1	up-regulated-saver	0.13	2.21136		RFX8	up-regulated-saver	0.1077	2.19093		SPATA18	up-regulated-saver	10.147	2.65262		CST6	up-regulated-saver	2.5663	4.43719		AC124852.1	up-regulated-saver	0.2065	4.75838		VXN	up-regulated-saver	0	1.8135		AP000842.3	up-regulated-saver	0.0215	1.88666		LCN12	up-regulated-saver	0.3486	2.38185
APOL1	up-regulated-saver	97.6783	2.04618		SMPDL3B	up-regulated-saver	3.99	2.30466		AP002387.1	up-regulated-saver	5.7268	2.11315		CCDC180	up-regulated-saver	0.0205	2.03336		RIT1	up-regulated-saver	20.2331	2.42844		GPC5-AS1	up-regulated-saver	0	3.14195		AC008870.2	up-regulated-saver	0.3254	4.13184		ERO1B	up-regulated-saver	3.1226	1.8001		AC002331.1	up-regulated-saver	0	1.88789		FOXC1	up-regulated-saver	5.8859	2.28427
MST1R	up-regulated-saver	5.5623	2.01503		PRSS2	up-regulated-saver	0.082	2.23707		LINC02159	up-regulated-saver	0.0786	2.06438		PROK1	up-regulated-saver	0	2.00346		AP003465.2	up-regulated-saver	0	2.33814		ADCY2	up-regulated-saver	0.4884	3.41628		ADGRD2	up-regulated-saver	0.0893	4.93971		CAPN13	up-regulated-saver	4.7172	1.73947		C21orf91-OT1	up-regulated-saver	0	1.85715		BHLHA9	up-regulated-saver	0	2.21563
SLC45A3	up-regulated-saver	3.1226	2.00304		AC121338.1	up-regulated-saver	0.0289	2.23713		AP001636.3	up-regulated-saver	0.0504	2.02903		TRIM73	up-regulated-saver	0.0179	2.0093		HHLA2	up-regulated-saver	18.6356	2.39454		AL035665.2	up-regulated-saver	0	4.3108		AC027601.1	up-regulated-saver	0.075	4.08027		AC125603.1	up-regulated-saver	0	1.70303		MAGEA8-AS1	up-regulated-saver	0	1.83066		AC079360.1	up-regulated-saver	0	2.14475
AL022322.1	up-regulated-saver	0.8324	1.97708		SHISAL2A	up-regulated-saver	0.1989	2.23144		AC079612.1	up-regulated-saver	0	1.95647		PPP4R1-AS1	up-regulated-saver	0.1022	2.024		TLR3	up-regulated-saver	16.3173	2.32782		AC008758.5	up-regulated-saver	0.0368	3.32313		ZAN	up-regulated-saver	0.1171	3.69919		AL121935.2	up-regulated-saver	0.0482	1.70989		CBR1	up-regulated-saver	32.9325	1.858		AC068946.1	up-regulated-saver	0.0565	2.10799
ABRACL	up-regulated-saver	46.1814	1.95992		COL6A5	up-regulated-saver	0.0078	2.22433		GLYATL2	up-regulated-saver	0.0797	2.00297		ACTL6B	up-regulated-saver	0.0385	1.97767		AC114316.1	up-regulated-saver	0.1004	2.30891		SCEL	up-regulated-saver	2.1917	3.18768		ABTB1	up-regulated-saver	4.7897	3.86466		AC093240.1	up-regulated-saver	0	1.64115		TMPRSS13	up-regulated-saver	5.6304	1.85102		AL354710.2	up-regulated-saver	0.0579	2.0893
C8orf44	up-regulated-saver	1.227	1.93904		AC244502.1	up-regulated-saver	0.0397	2.16541		ALDH4A1	up-regulated-saver	12.6184	1.95898		NKPD1	up-regulated-saver	0.0136	2.02696		AC002070.1	up-regulated-saver	1.4169	2.27325		SCN1B	up-regulated-saver	1.9212	3.16475		ASIC3	up-regulated-saver	0.192	3.51522		AC006946.2	up-regulated-saver	0.1114	1.64765		AC073365.1	up-regulated-saver	0.0352	1.84624		CLCN4	up-regulated-saver	1.7568	2.13384
AP003352.1	up-regulated-saver	0.7792	1.93369		CCDC24	up-regulated-saver	3.9136	2.14491		CBLIF	up-regulated-saver	0.235	1.91482		QRFPR	up-regulated-saver	0.0124	1.95029		LINC02747	up-regulated-saver	4.7819	2.29372		LINC02555	up-regulated-saver	0.701	3.22608		HDAC10	up-regulated-saver	0.1039	3.38627		AL121904.1	up-regulated-saver	0	1.62627		EIF3B	up-regulated-saver	35.5393	1.83119		LINC00106	up-regulated-saver	1.2666	2.18134
AL139234.1	up-regulated-saver	0.1157	1.93713		ELOVL2	up-regulated-saver	2.7122	2.16489		AC078852.1	up-regulated-saver	0	1.90143		AC005091.1	up-regulated-saver	0	1.96968		PRKAR1B-AS2	up-regulated-saver	8.1023	2.26945		PIGR	up-regulated-saver	387.744	3.45332		SCO2	up-regulated-saver	0.3031	3.34735		DNAJB4	down-regulated-saver	3.9974	1.80528		STK24-AS1	up-regulated-saver	0.2449	1.82035		CEP55	up-regulated-saver	10.6952	2.07496
GHR	down-regulated-saver	0.1333	1.95921		LINC02338	down-regulated-saver	0	3.01557		MPP2	down-regulated-saver	0.1984	2.41349		AL360014.1	down-regulated-saver	0	2.52175		MARCHF10	down-regulated-saver	0.0177	2.88877		MAP3K15	down-regulated-saver	0.249	5.75625		SERPINB6	down-regulated-saver	3.5128	3.68156		PDGFB	down-regulated-saver	5.4896	1.65659		AC097637.3	down-regulated-saver	0	2.6164		LINC01537	down-regulated-saver	0.0632	2.24131
OSBPL10	down-regulated-saver	1.7525	1.90033		OR6B1	down-regulated-saver	0	2.51764		CNTN2	down-regulated-saver	0.0055	2.16642		CD81	down-regulated-saver	59.371	2.40109		ATP6V1C2	down-regulated-saver	0.2751	2.84941		FMN2	down-regulated-saver	0.0057	4.30425		AL627171.2	down-regulated-saver	0.2235	3.21871		AC103591.4	down-regulated-saver	0.2877	1.65675		UPB1	down-regulated-saver	0.0309	2.22634		Z70719.1	down-regulated-saver	0	2.30256
MAP1A	down-regulated-saver	0.7884	1.89583		DUXA	down-regulated-saver	0	2.48504		RGS22	down-regulated-saver	0.0103	2.12407		CHST4	down-regulated-saver	0.02	2.20064		RBFOX3	down-regulated-saver	0.009	2.81876		ZNF488	down-regulated-saver	0.0358	4.38237		TSPAN6	down-regulated-saver	9.5432	3.06325		PTX3	down-regulated-saver	0.6703	1.61358		GDF2	down-regulated-saver	0	2.34893		ATP2B3	down-regulated-saver	0.0058	2.15554
EMP1	down-regulated-saver	11.6491	1.87642		LONRF3	down-regulated-saver	0.2358	2.39021		FABP4	down-regulated-saver	0.3437	2.0567		AC007221.1	down-regulated-saver	0.1249	2.06566		ATP2B3	down-regulated-saver	0.005	2.734		NGF-AS1	down-regulated-saver	0	3.28589		AP003721.2	down-regulated-saver	0.0504	3.05945		SRGAP2C	down-regulated-saver	0.7588	1.57566		ANO5	down-regulated-saver	0.1	2.04496		BTG2	down-regulated-saver	46.2411	2.16531
GABRG1	down-regulated-saver	0	1.9423		AC068418.3	down-regulated-saver	0	2.21832		AC064805.2	down-regulated-saver	0	1.99346		GPR180	down-regulated-saver	0.9347	2.01155		PLEKHG4B	down-regulated-saver	0.0569	2.65939		AL139002.1	down-regulated-saver	0	3.66989		PCOLCE2	down-regulated-saver	0.6774	2.6838		AC109466.1	down-regulated-saver	0	1.56096		AC008703.1	down-regulated-saver	0	2.03765		SOX17	down-regulated-saver	1.3703	2.17014
ITGA7	down-regulated-saver	1.5499	1.84285		AC009971.1	down-regulated-saver	0	2.58443		CCDC136	down-regulated-saver	0.2421	2.0058		LINC02512	down-regulated-saver	0	2.51879		TINCR	down-regulated-saver	0.0667	2.6608		RDH10-AS1	down-regulated-saver	0.0719	3.77666		LINC00390	down-regulated-saver	0.0116	2.72344		IL20RA	down-regulated-saver	1.4697	1.54974		ANK2	down-regulated-saver	0.2291	1.93767		C1QTNF4	down-regulated-saver	0.2113	2.10032
JAM3	down-regulated-saver	0.5386	1.83641		AL355474.1	down-regulated-saver	0	2.13471		HTR2B	down-regulated-saver	0.0683	2.00823		WNT2	down-regulated-saver	0	1.98337		PSAT1	down-regulated-saver	3.2866	2.61191		MAFA	down-regulated-saver	0.0104	3.76926		PART1	down-regulated-saver	0.0618	2.59785		SOX18	down-regulated-saver	3.2513	1.5345		PDLIM3	down-regulated-saver	1.7708	1.8944		AC104123.1	down-regulated-saver	0.0526	1.99441
ANXA1	down-regulated-saver	60.9133	1.83035		CD36	down-regulated-saver	2.4168	2.22718		ITGB1BP2	down-regulated-saver	0.3069	2.01461		LINC01505	down-regulated-saver	0	1.87183		SH3GL3	down-regulated-saver	0.0146	2.61667		GAL3ST2	down-regulated-saver	0.0427	3.68775		AL121899.1	down-regulated-saver	0.098	2.53501		B3GALNT1	down-regulated-saver	1.4639	1.50044		LINC01612	down-regulated-saver	0.0314	1.8817		SOCS3	down-regulated-saver	33.1608	1.98668
HSPB6	down-regulated-saver	0.436	1.83342		AL355073.1	down-regulated-saver	0	2.11201		KIAA0408	down-regulated-saver	0	2.00199		RAB20	down-regulated-saver	13.8347	1.84519		NECTIN4	down-regulated-saver	0.1249	2.55125		PSAT1	down-regulated-saver	6.9765	3.58464		BTC	down-regulated-saver	0.2921	2.42248		LINC00622	down-regulated-saver	0.196	1.49218		SLC8A3	down-regulated-saver	0.0228	1.91273		LINC02752	down-regulated-saver	0.027	1.96794
ST6GALNAC3	down-regulated-saver	0.1588	1.81093		LIMCH1	down-regulated-saver	6.4688	2.18818		PCDH9	down-regulated-saver	0.0102	1.96889		SLCO4C1	down-regulated-saver	0.0963	1.798		TFAP2A	down-regulated-saver	0.0974	2.54318		DLK1	down-regulated-saver	0	3.09158		FBXO34	down-regulated-saver	10.0633	2.36067							FAM187B	down-regulated-saver	0	1.85326		GATD3A	down-regulated-saver	0.1164	1.94843
[truncated: 12 more columns]

## Sheet: Suppl. Table S6
Suppl. Table S6. Genes and parameters for SAHR model construction in external dataset
Colon cancer (Smith et al.)					Lung adenocarcinama (Okayama et al.)
Gene Name	Gene Type	Cut Off	HR		Gene Name	Gene Type	Cut Off	HR
BAMBI	oncogene-like	8.58156	2.52231		ATP8B3	oncogene-like	75.7671	2.24854
DLX2	oncogene-like	5.13791	2.30973		C1QTNF6	oncogene-like	8.6205	1.90127
FJX1	oncogene-like	6.92074	2.27961		DKK1	oncogene-like	165.182	2.26559
HOXC13	oncogene-like	6.75463	2.42085		GJB2	oncogene-like	344.305	1.95219
ITIH2	oncogene-like	6.99801	2.26252		GREB1L	oncogene-like	56.5397	1.80189
LRRN4	oncogene-like	6.07131	2.1787		HOXB7	oncogene-like	128.707	1.78714
NMB	oncogene-like	8.11838	2.21399		MDFI	oncogene-like	54.2893	1.90142
NPC1L1	oncogene-like	6.87547	2.30296		MIR924HG	oncogene-like	27.9722	2.12909
CA2	suppressor-like	9.14686	2.05403		PTPRH	oncogene-like	55.3906	1.84395
CLCA1	suppressor-like	9.77624	2.29091		STRIP2	oncogene-like	51.129	1.81172
CPT2	suppressor-like	8.73129	2.16124		TFAP2A	oncogene-like	448.93	1.82324
GGT6	suppressor-like	8.09699	2.17189		VGF	oncogene-like	68.6422	1.84089
GLB1L3	suppressor-like	7.49547	2.04731		ADGRD1	suppressor-like	713.271	1.95128
GPA33	suppressor-like	10.9058	2.26887		CA4	suppressor-like	48.288	1.87411
HRCT1	suppressor-like	8.29042	1.99934		CACNA2D2	suppressor-like	1204.82	1.7479
KBTBD11	suppressor-like	7.85519	2.1436		CCDC13-AS1	suppressor-like	37.2987	1.83488
SELENBP1	suppressor-like	10.2418	2.07925		COL6A6	suppressor-like	583.236	1.77473
SLC13A2	suppressor-like	5.90504	2.09817		CYP17A1	suppressor-like	3.93802	1.88778
SLC44A4	suppressor-like	9.38039	2.43645		GNG7	suppressor-like	253.909	1.80029
SLC7A3	suppressor-like	6.48218	1.98575		HACD4	suppressor-like	17.6425	1.75776
TEX11	suppressor-like	6.1417	2.19814		KAT2B	suppressor-like	1974.75	2.0237
TMEM72	suppressor-like	5.02548	2.03447		KHDRBS2	suppressor-like	44.3931	1.72881
ALDH4A1	up-regulated-saver	7.36432	1.95898		CAPN13	up-regulated-saver	13.4799	1.73947
CLCN1	up-regulated-saver	6.6282	2.21136		ERO1B	up-regulated-saver	147.486	1.8001
GLYATL2	up-regulated-saver	6.83733	2.00297		ZPBP2	up-regulated-saver	12.6171	1.95659
LINC01555	up-regulated-saver	6.08156	2.54335		B3GALNT1	down-regulated-saver	291.362	1.50044
CCDC136	down-regulated-saver	6.36539	2.0058		DNAJB4	down-regulated-saver	1151.4	1.80528
CNTN2	down-regulated-saver	7.87011	2.16642		IL20RA	down-regulated-saver	143.686	1.54974
FABP4	down-regulated-saver	6.9524	2.0567		LINC00622	down-regulated-saver	159.014	1.49218
HTR2B	down-regulated-saver	5.28863	2.00823		PDGFB	down-regulated-saver	100.243	1.65659
ITGB1BP2	down-regulated-saver	5.93726	2.01461		PTX3	down-regulated-saver	250.291	1.61358
KIAA0408	down-regulated-saver	4.65547	2.00199		SOX18	down-regulated-saver	60.2447	1.5345
MPP2	down-regulated-saver	7.07361	2.41349		SRGAP2C	down-regulated-saver	1577.39	1.57566
PCDH9	down-regulated-saver	4.48902	1.96889
RGS22	down-regulated-saver	6.41978	2.12407
